# Supplementary material for: A cobalt-based metal–organic framework as a sustainable catalyst for base-free transfer hydrogenation of biomass-derived carbonyl compounds
Source: Royal Society of Chemistry journal article supplement (doi:10.1039/d4su00368c), 2024-01-01
Supplement: d4su00368c1.pdf [file d4su00368c1.pdf]

## Electronic Supplementary Information

### **A cobalt-based metal-organic framework as a sustainable catalyst for base-free transfer hydrogenation of biomass-derived carbonyl compounds**

Aashish, Ruchika Gupta and Rajeev Gupta\*

Department of Chemistry, University of Delhi, Delhi 110007, India

E-mail: [rgupta@chemistry.du.ac.in](mailto:rgupta@chemistry.du.ac.in)

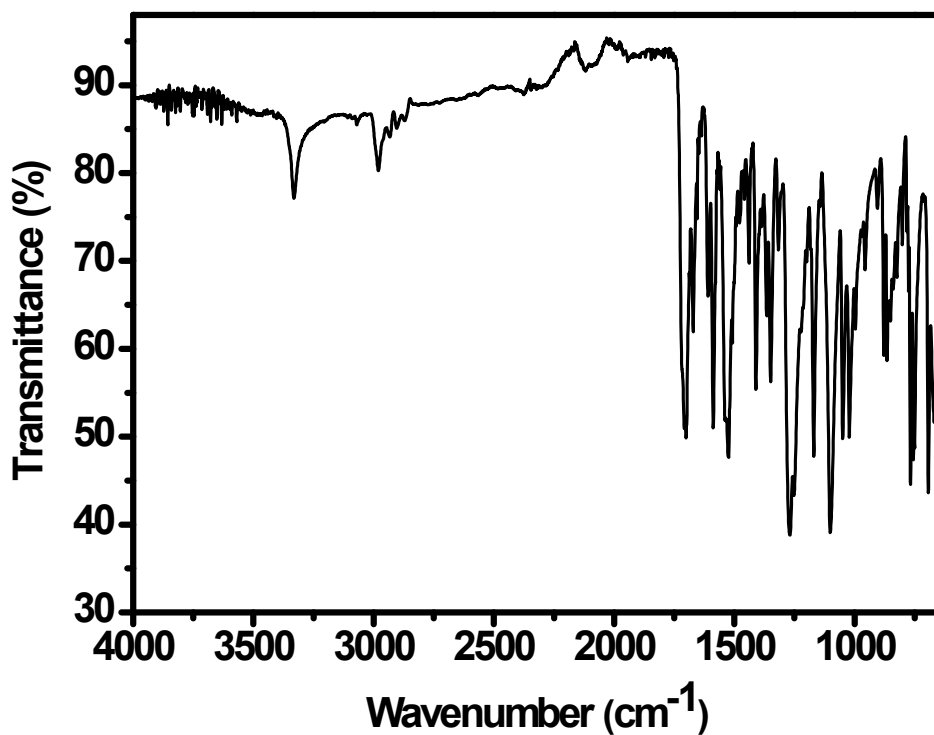

Figure S1. FTIR spectrum of L2.

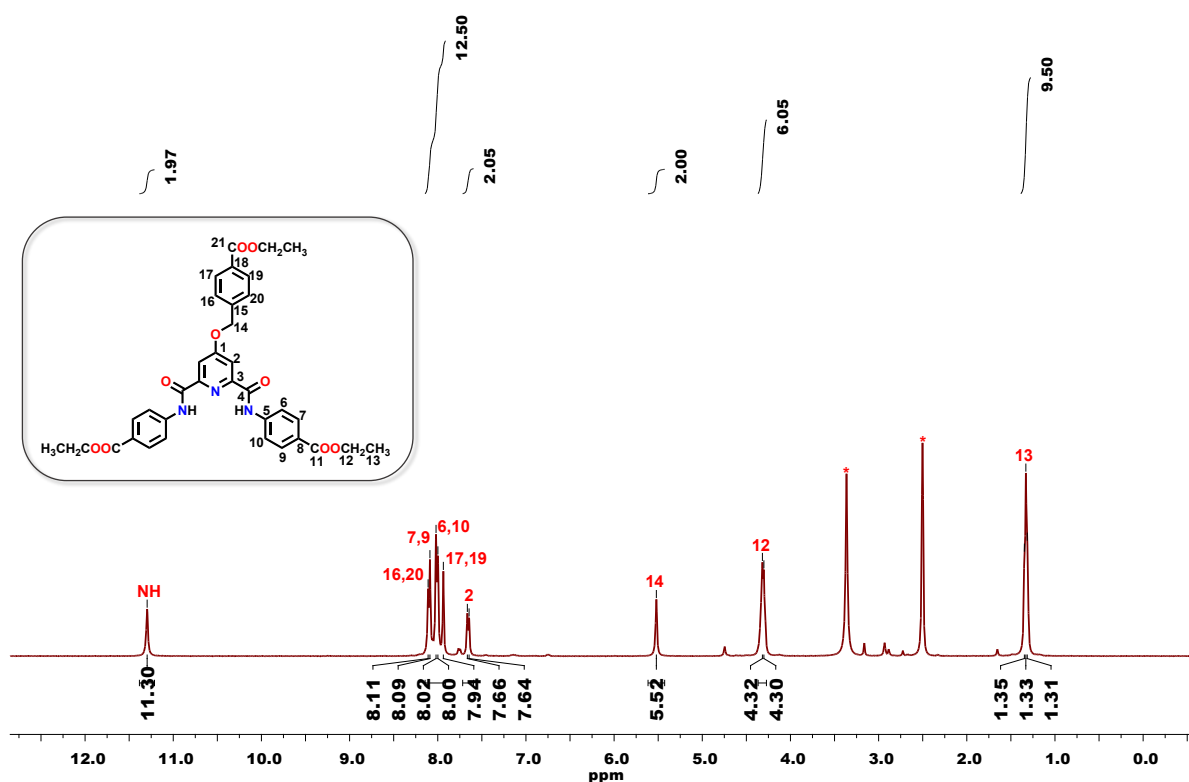

Figure S2.  $^1\text{H}$  NMR spectrum of L2 in  $\text{DMSO-}d_6$  solvent where \* represents the residual solvent and/or adventitious water peak.

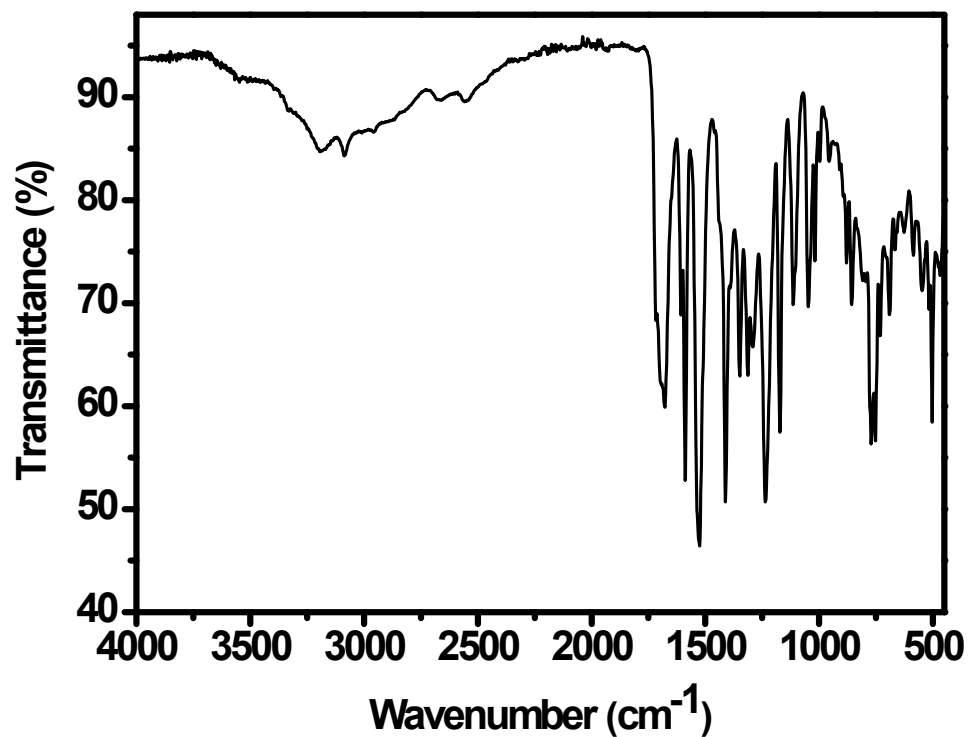

Figure S3. FTIR spectrum of ligand L3.

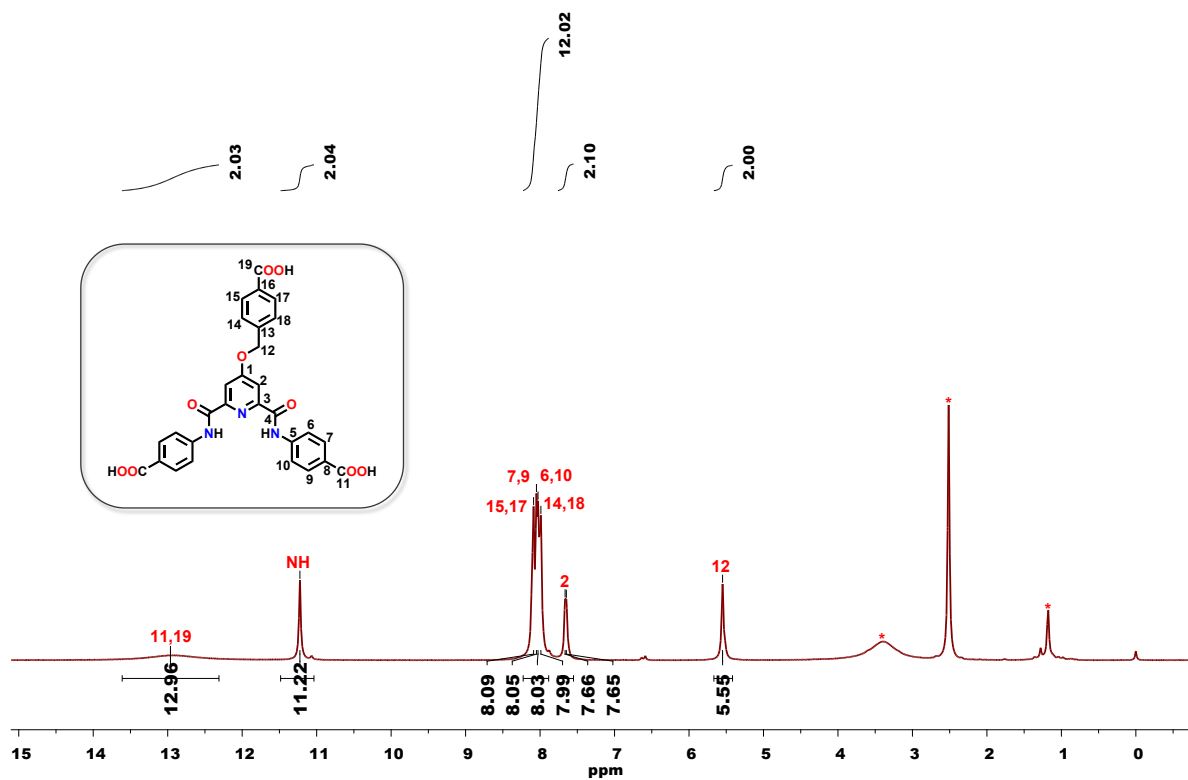

Figure S4. <sup>1</sup>H NMR spectrum of ligand L3 in DMSO-*d*<sub>6</sub> solvent where \* represents the residual solvent and/or adventitious water peak.

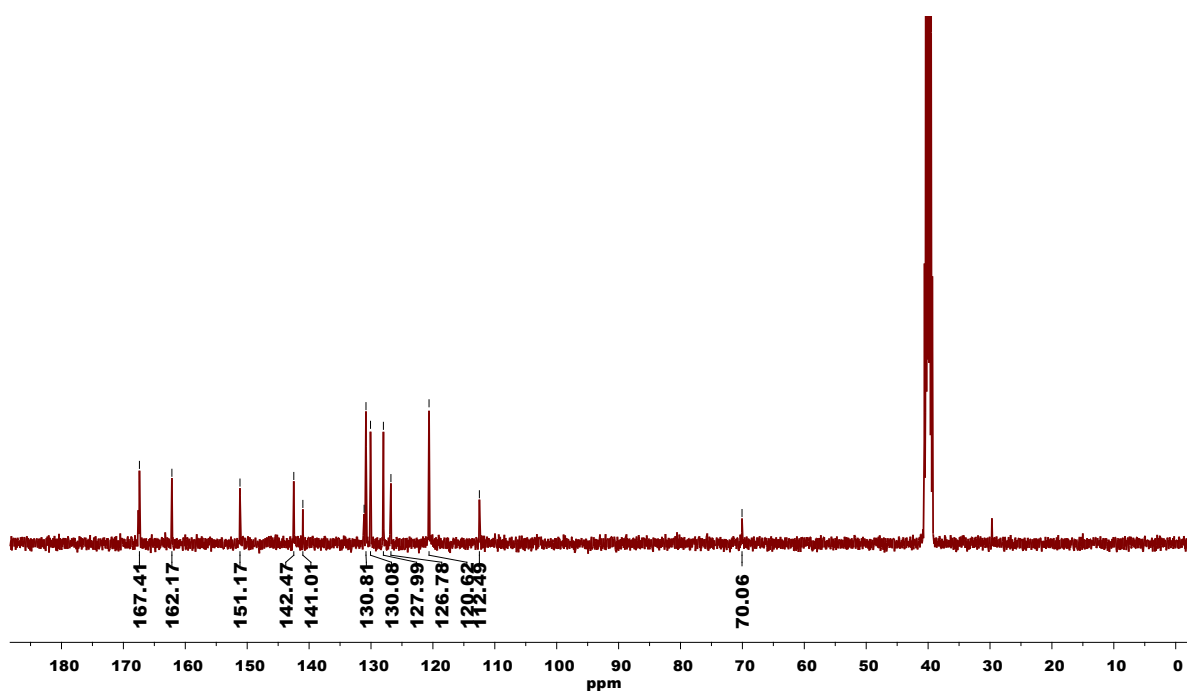

**Figure S5.**  $^{13}\text{C}$  NMR spectrum of ligand L3 in  $\text{DMSO-}d_6$  solvent where \* represents the residual solvent peak.

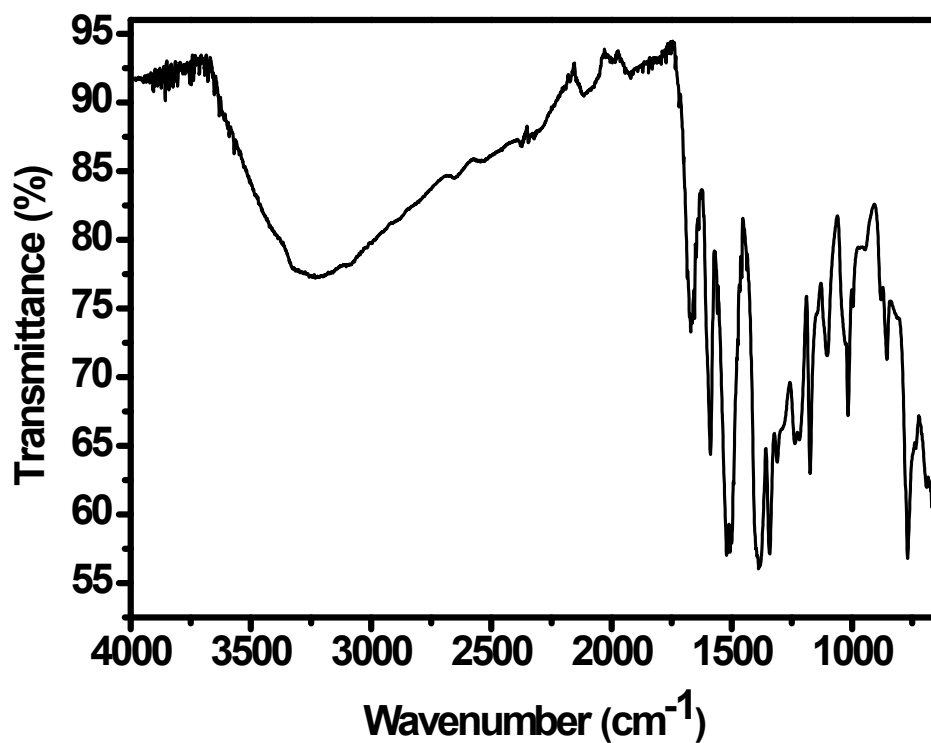

**Figure S6.** FTIR spectrum of MOF 1.

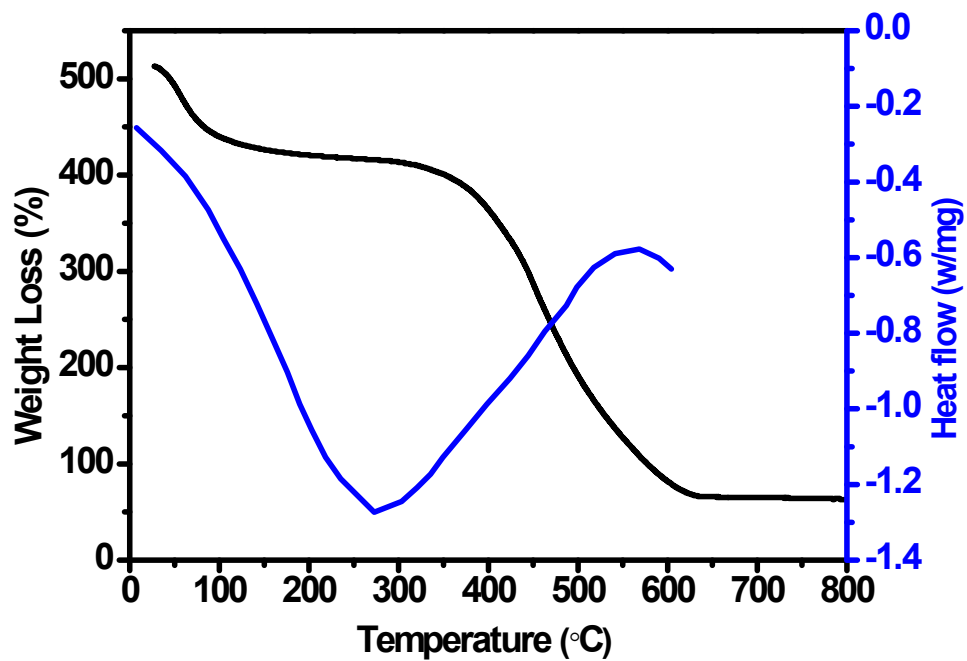

**Figure S7.** Thermal Gravimetric Analysis (TGA, black trace) and Differential Scanning Calorimetric (DSC, blue trace) plots for MOF 1.

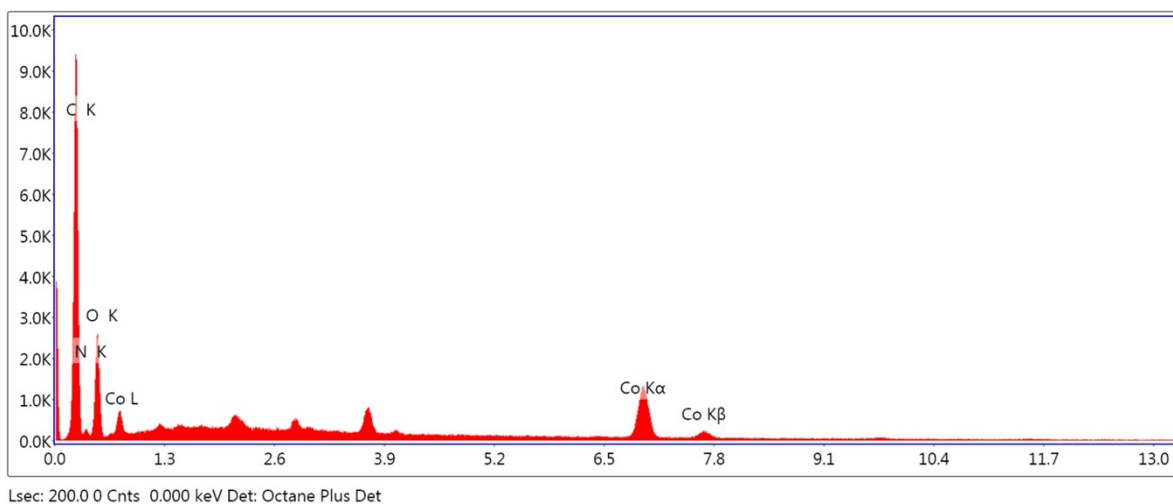

**Figure S8.** EDX spectrum of MOF 1.

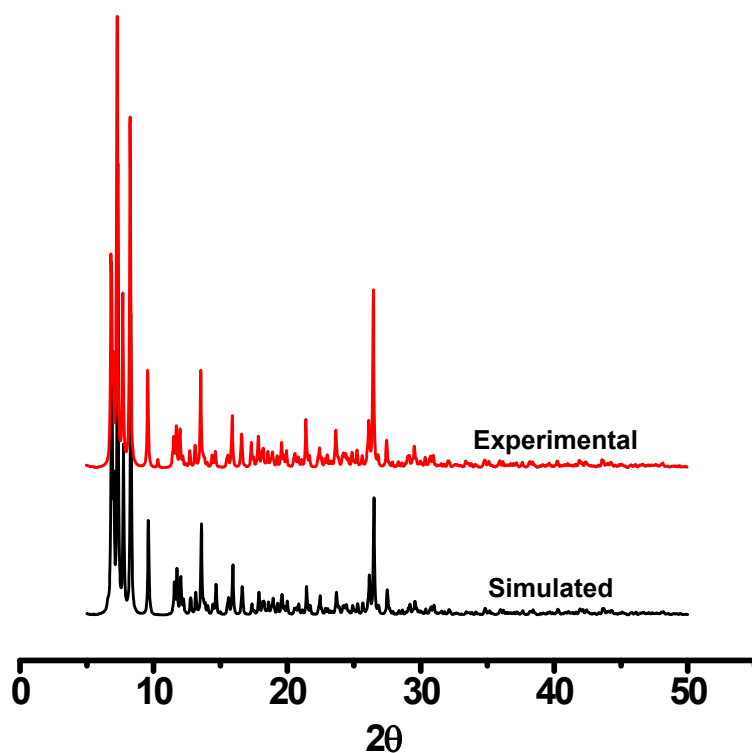

**Figure S9.** X-ray powder diffraction patterns for as-synthesized MOF **1** (red trace) and the one simulated from Mercury 3.0 using the single crystal diffraction data (black trace).

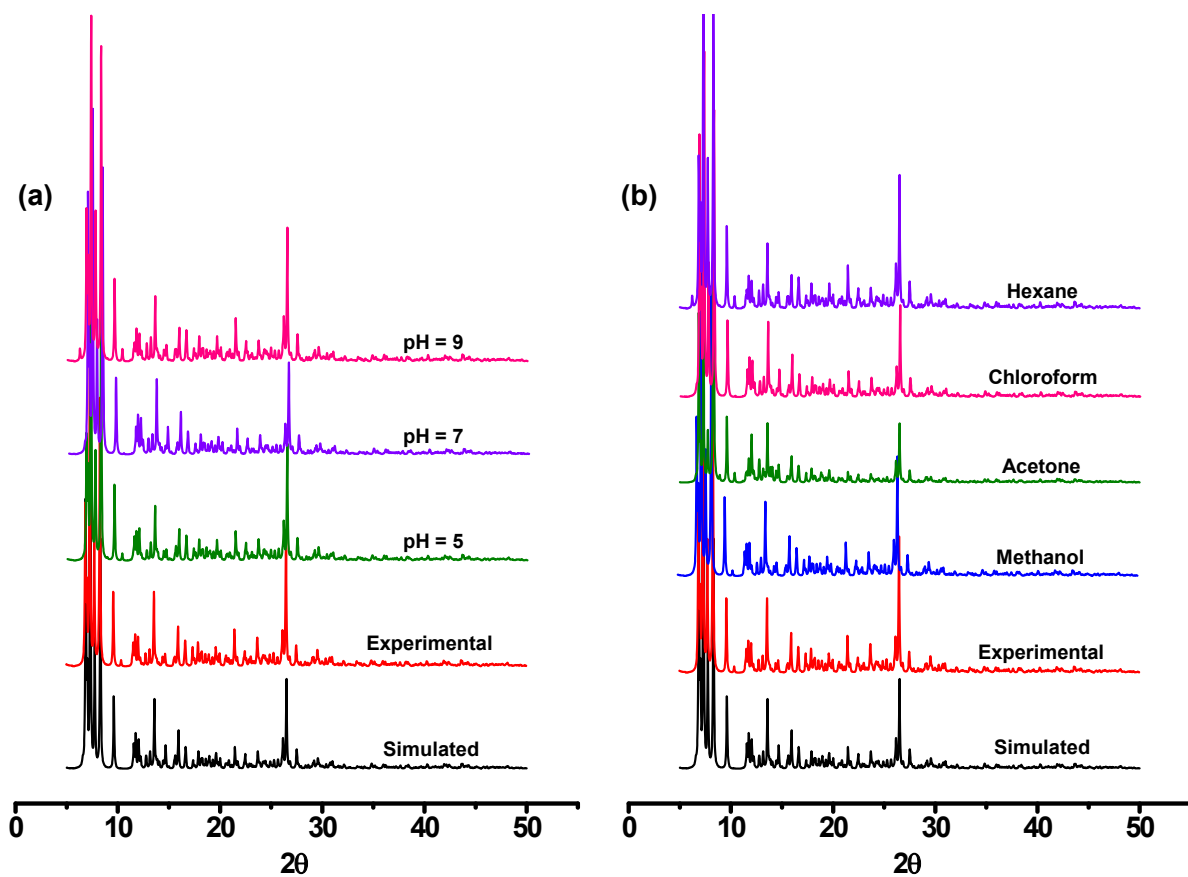

**Figure S10.** (a) X-ray powder diffraction patterns of as-synthesized MOF **1**, its simulated patterns, and after treatment with different (a) pHs and (b) organic solvents.

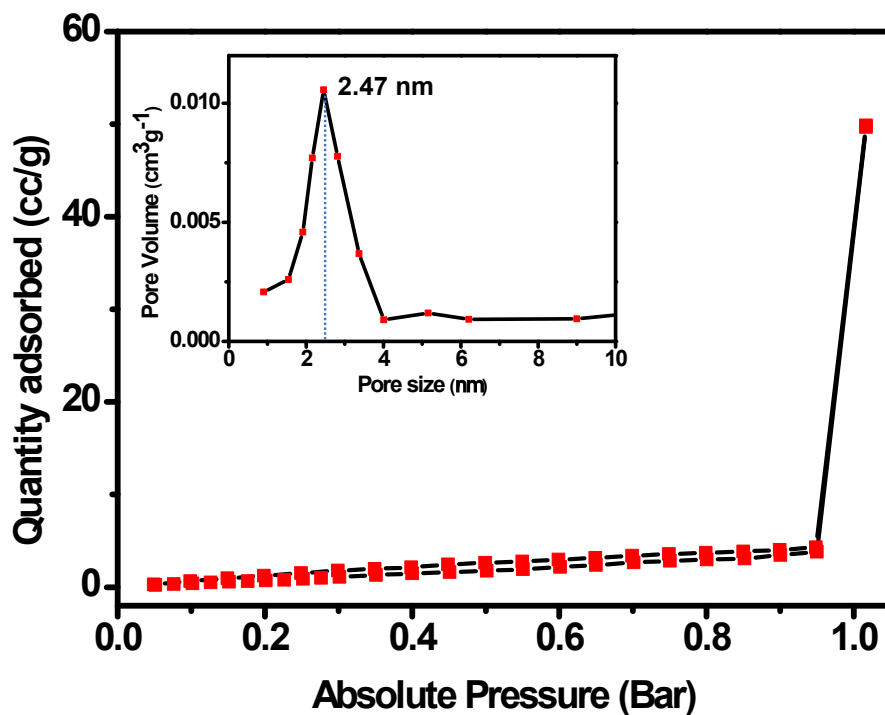

**Figure S11.**  $N_2$  sorption isotherm measured for MOF 1 at 77 K. Black and red traces respectively denote sorption and desorption plots. Inset shows the pore size distribution plot.

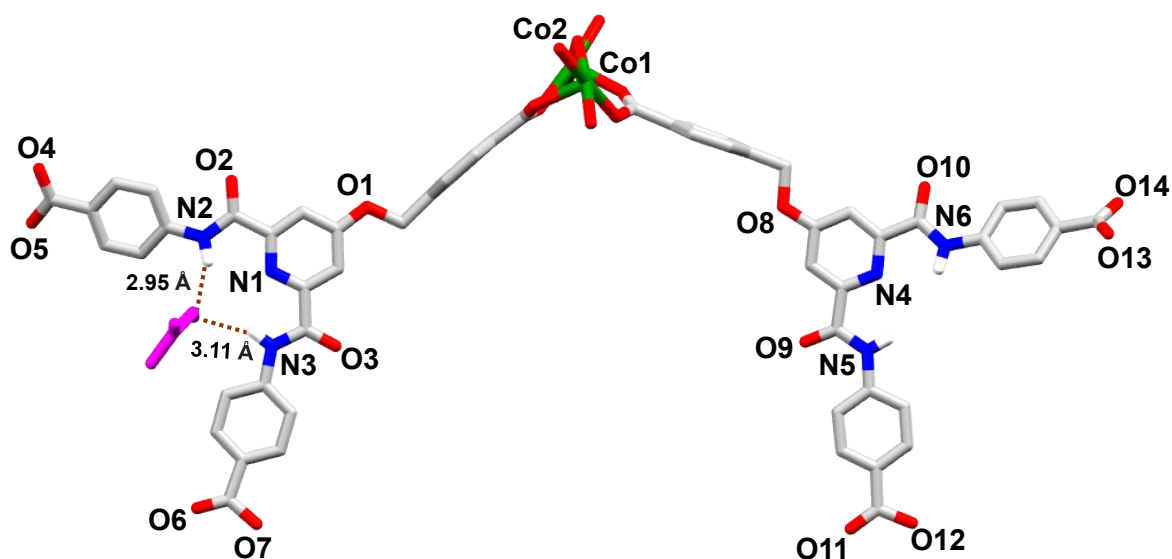

**Figure S12.** Asymmetric unit of MOF 1. Colour codes; green, Co; blue, N; red, O; grey, C; pink, DMF. The hydrogen atoms, except for amidic protons, have been omitted for clarity.

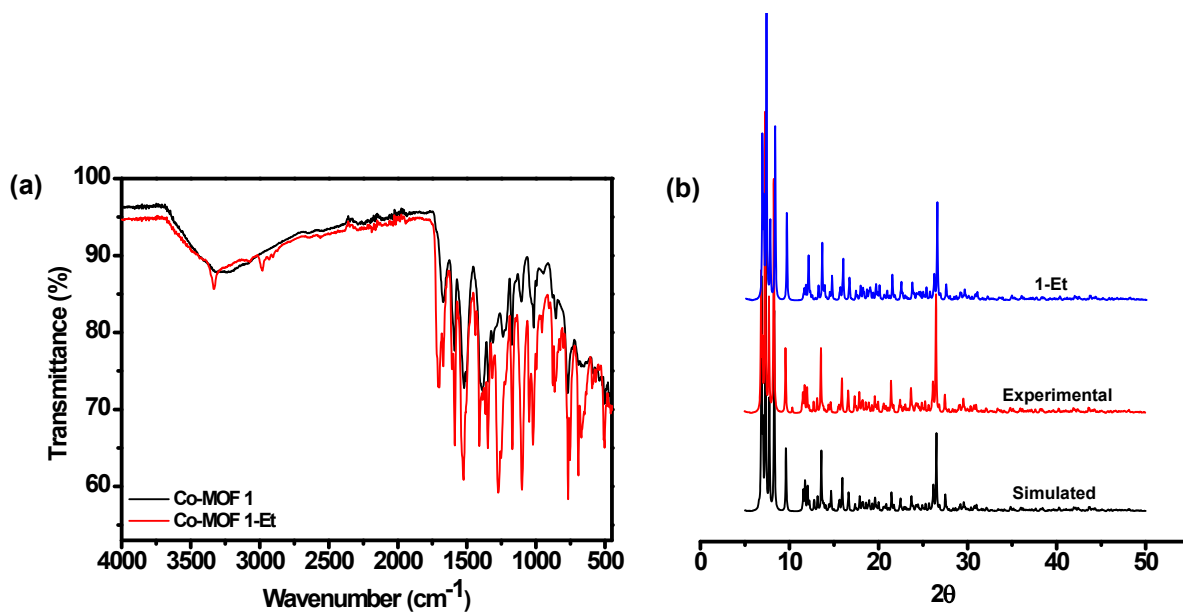

**Figure S13.** (a) FTIR spectra of MOF **1** (black trace) and **1-Et** (red trace); (b) X-ray powder diffraction patterns for as-synthesized **1** (red trace); its simulated one (black trace); and for **1-Et** (blue trace).

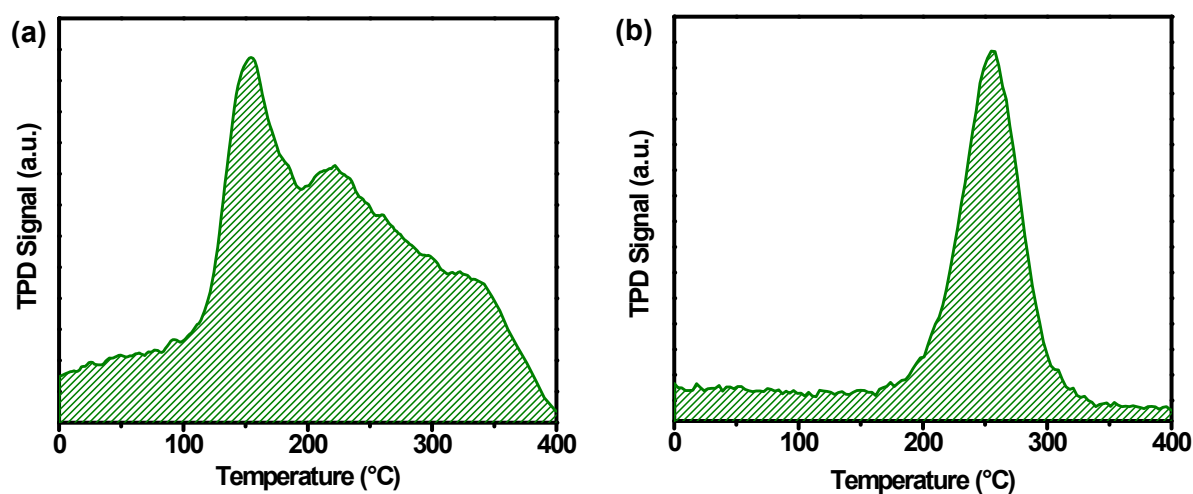

**Figure S14.** (a) NH<sub>3</sub>-TPD profile; and (b) CO<sub>2</sub>-TPD profile for MOF **1**. TDP: temperature-programmed desorption.



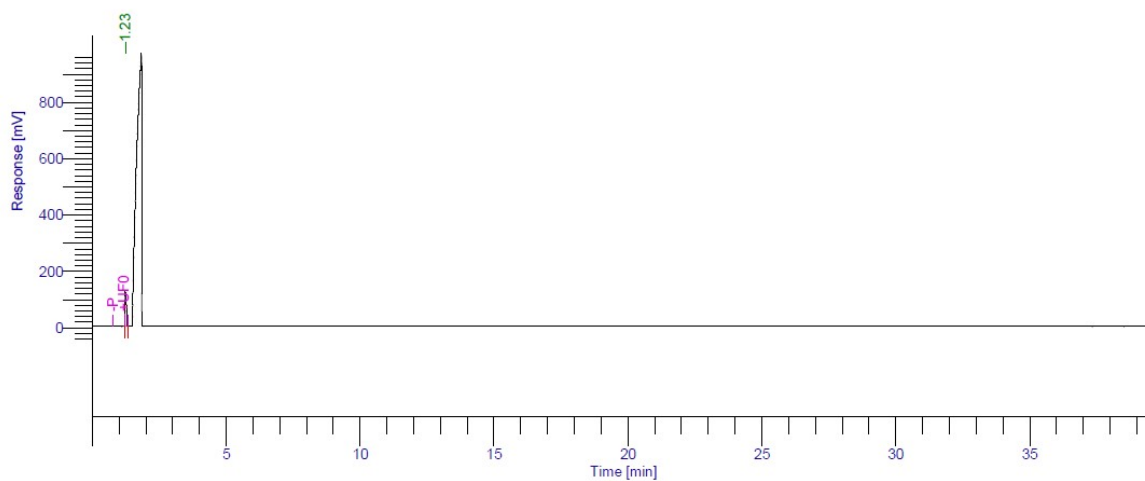

**Figure S15(a).** Gas chromatogram (in ethyl acetate) for the detection of in-situ generated acetone (at ca. 1.21 min.) in a catalytic reaction mixture.

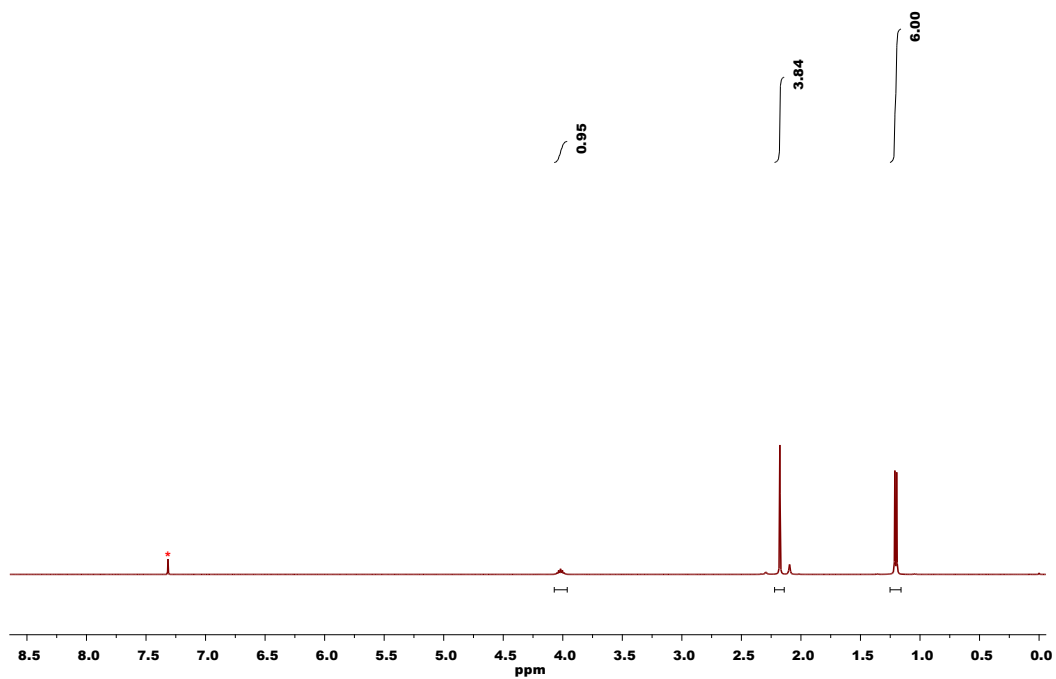

**Figure S15(b).**  $^1\text{H}$  NMR spectrum of in-situ formed acetone (at ca. 2.2 ppm) in  $\text{CDCl}_3$  solvent where \* represents the residual solvent peak. The spectrum also exhibits the presence of isopropyl alcohol used as a solvent.

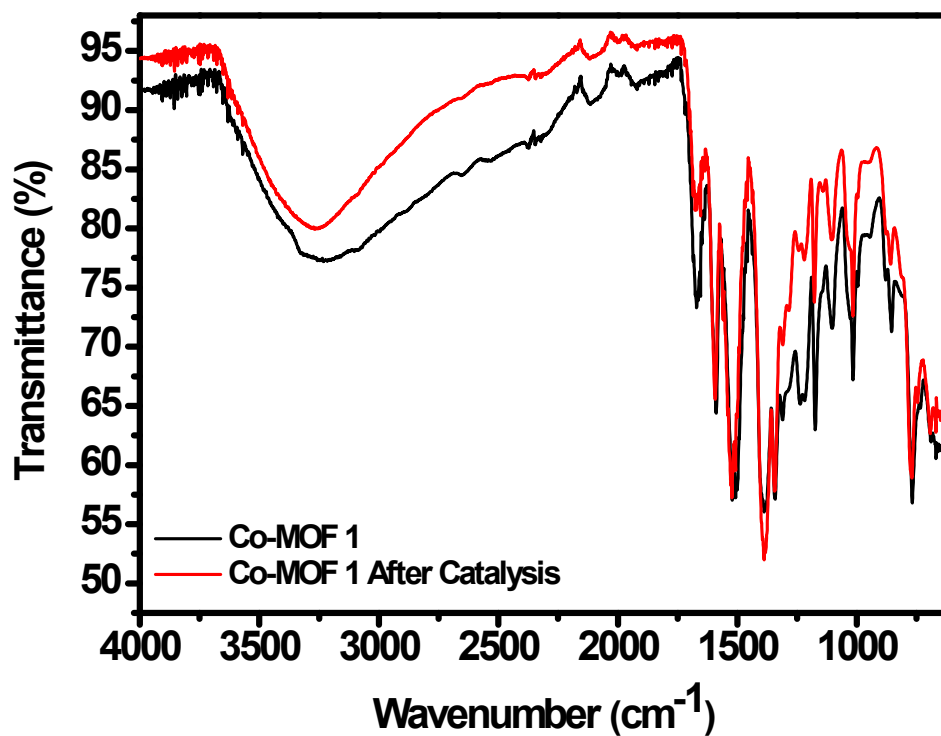

**Figure S16.** FTIR spectra of MOF 1 before (black trace) and after the TH reaction (red trace).

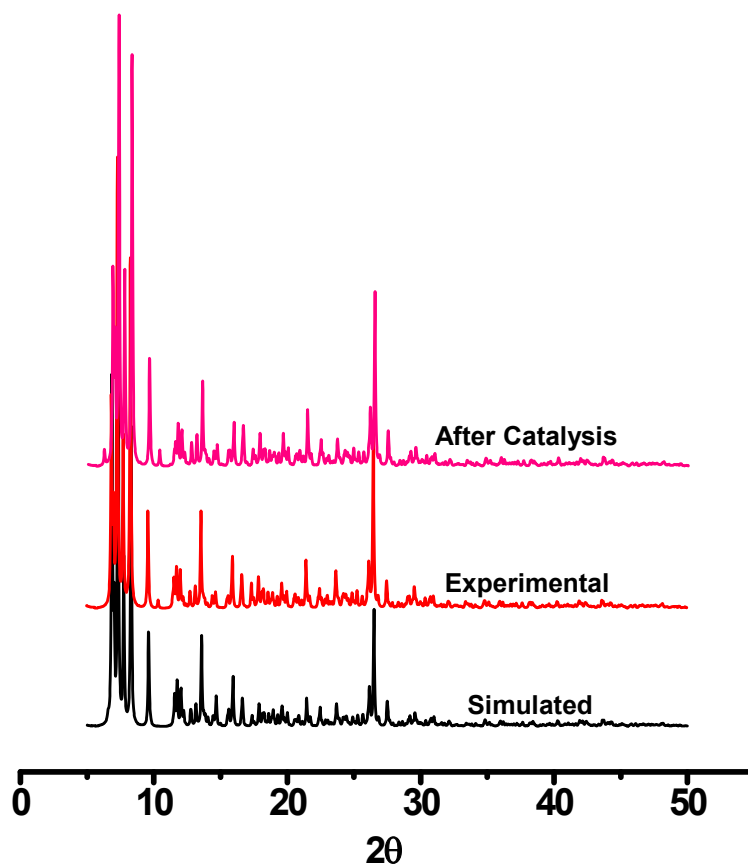

**Figure S17.** X-ray powder diffraction patterns for as-synthesized 1 (red trace); its simulated one (black trace); and after the TH reaction (pink trace).

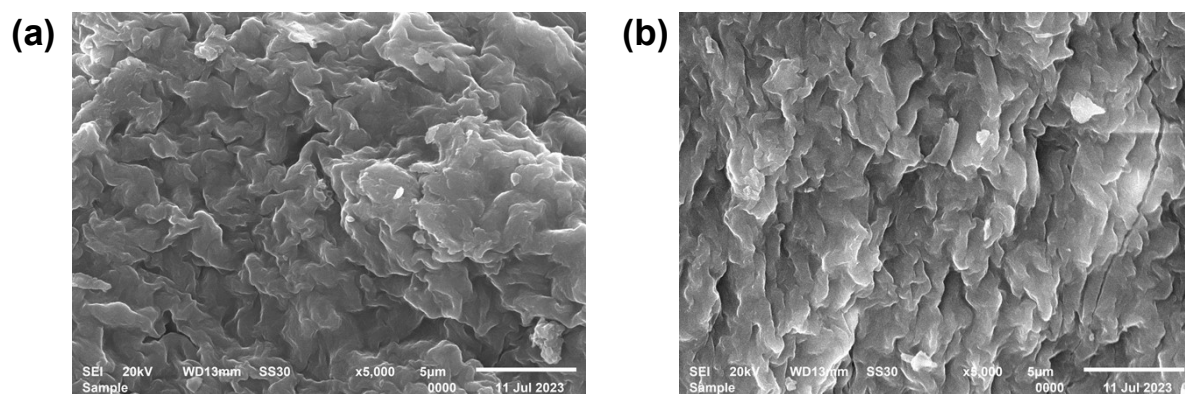

**Figure S18.** SEM images of (a) as-synthesized MOF 1 and (b) after the TH reaction.

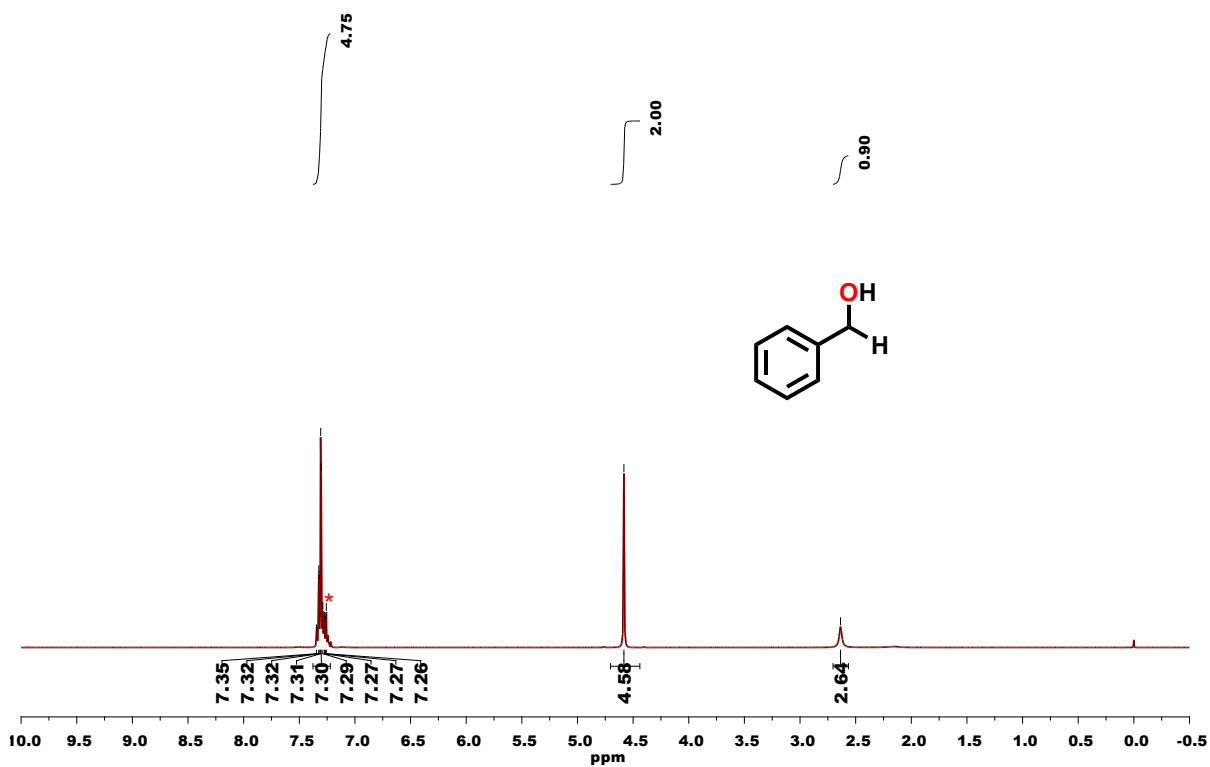

**Figure S19.** <sup>1</sup>H NMR spectrum of product 1 (benzyl alcohol) in CDCl<sub>3</sub> solvent where \* represents the residual solvent peak.

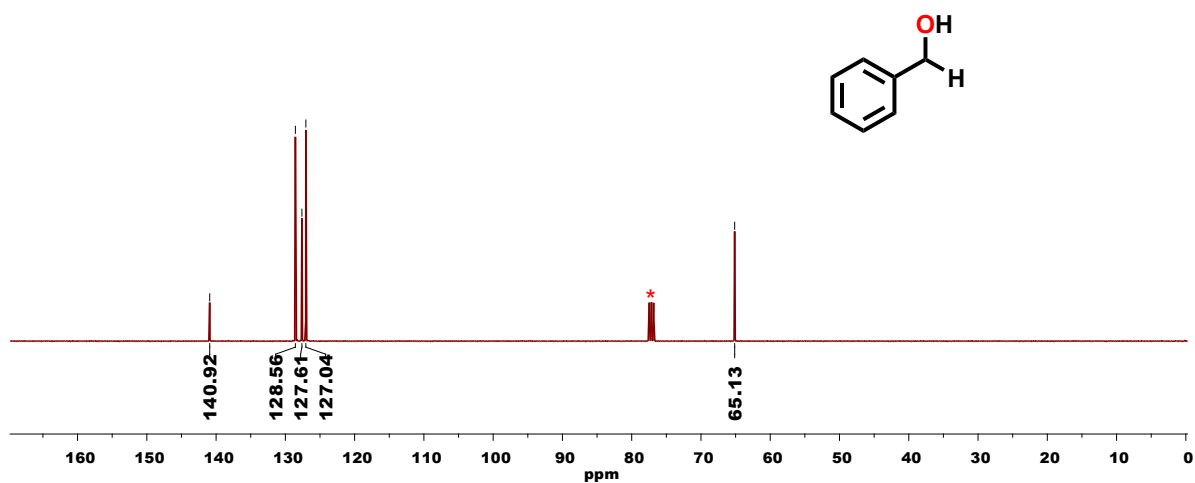

**Figure S20.**  $^{13}\text{C}$  NMR spectrum of product 1 (benzyl alcohol) in  $\text{CDCl}_3$  solvent where \* represents the residual solvent peak.

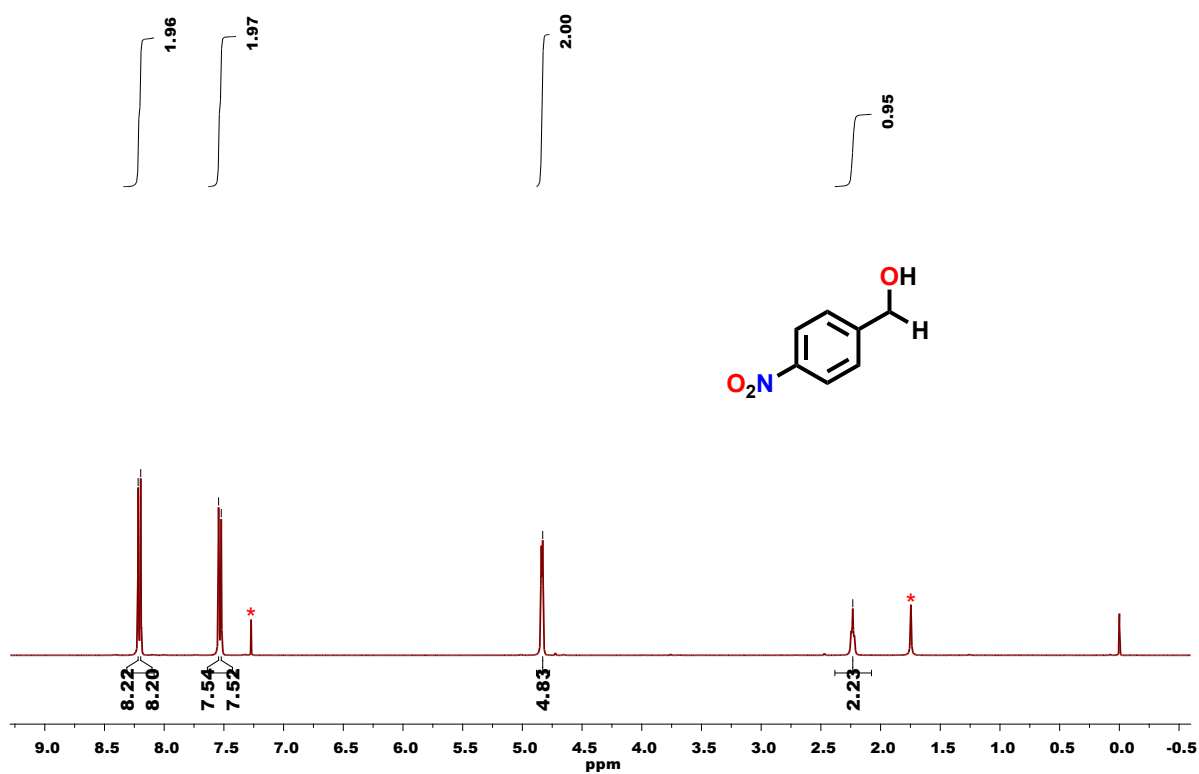

**Figure S21.**  $^1\text{H}$  NMR spectrum of product 2 (4-nitrobenzyl alcohol) in  $\text{CDCl}_3$  solvent where \* represents the residual solvent peak.

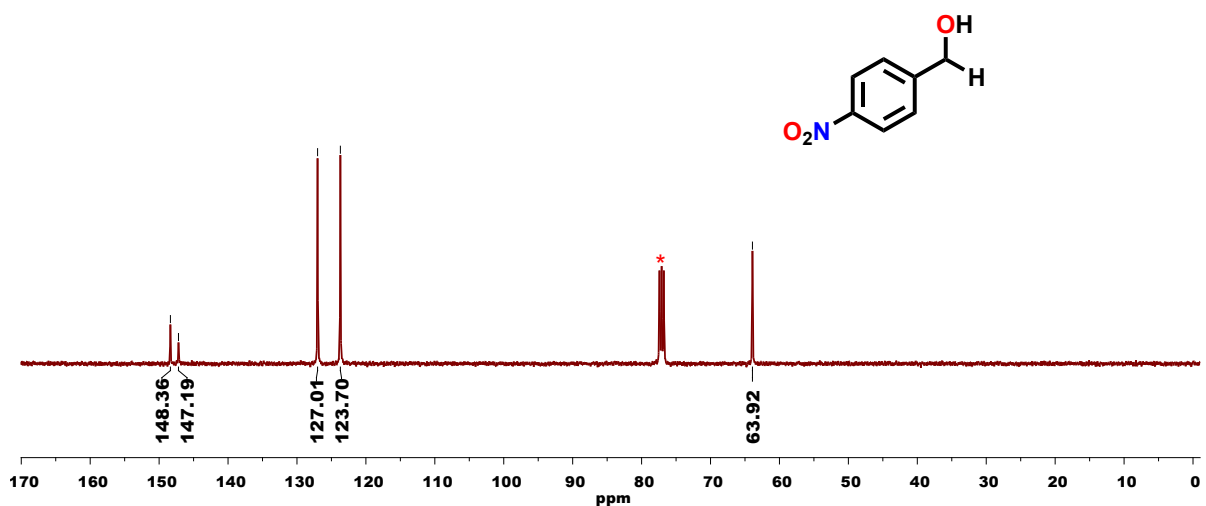

**Figure S22.**  $^{13}\text{C}$  NMR spectrum of product **2** (4-nitrobenzyl alcohol) in  $\text{CDCl}_3$  solvent where \* represents the residual solvent peak.

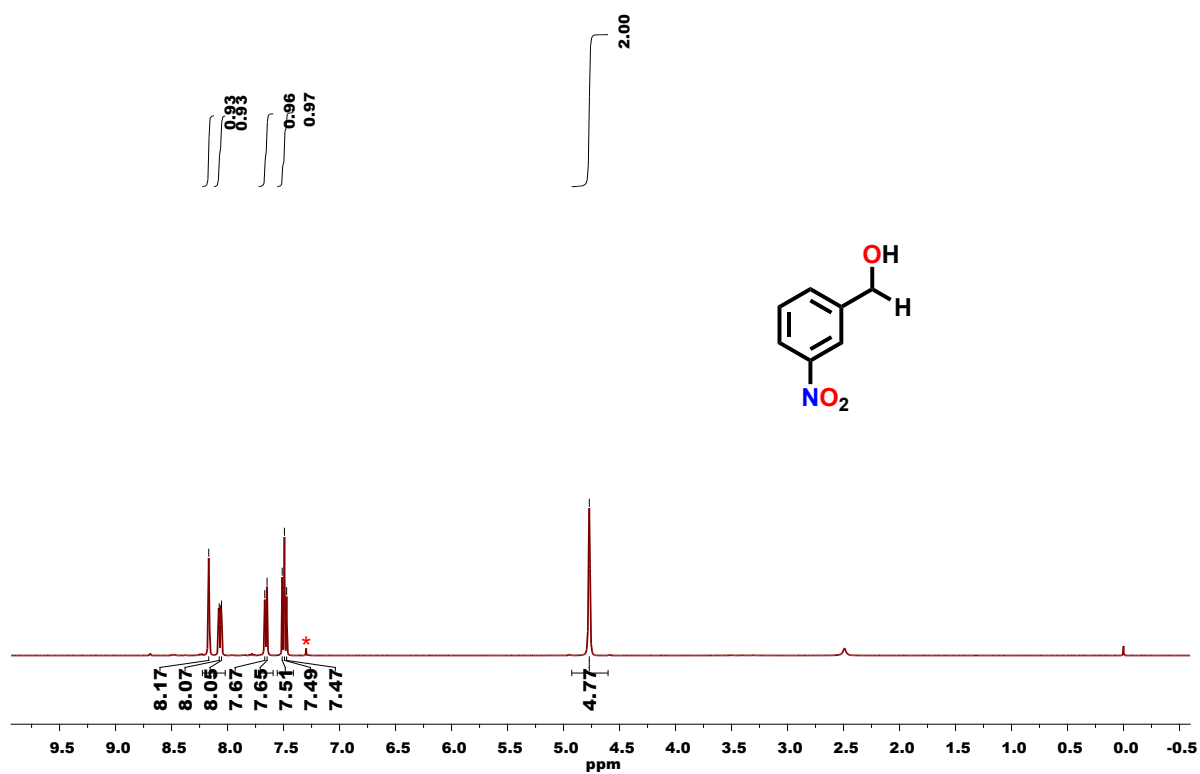

**Figure S23.**  $^1\text{H}$  NMR spectrum of product **3** (3-nitrobenzyl alcohol) in  $\text{CDCl}_3$  solvent where \* represents the residual solvent peak.

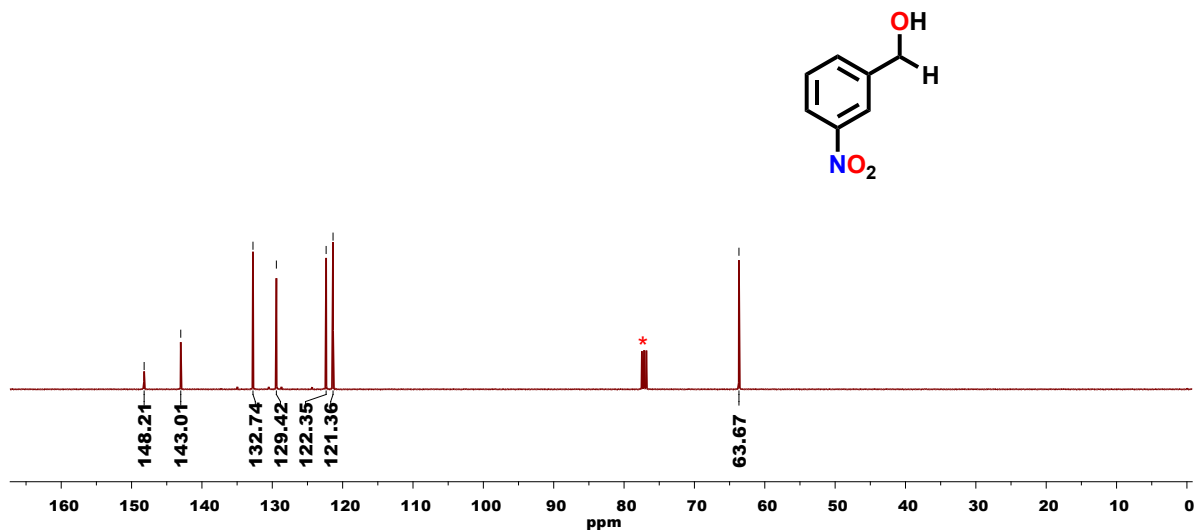

**Figure S24.**  $^{13}\text{C}$  NMR spectrum of product **3** (3-nitrobenzyl alcohol) in  $\text{CDCl}_3$  solvent where \* represents the residual solvent peak.

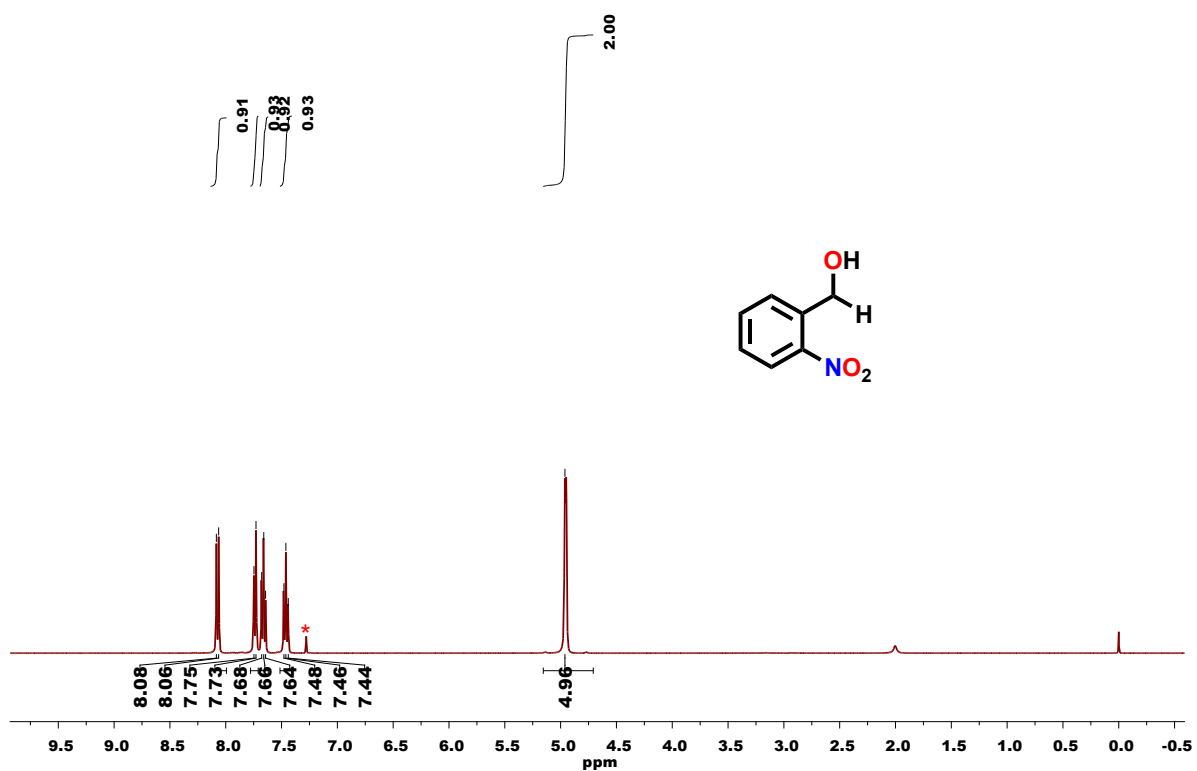

**Figure S25.**  $^1\text{H}$  NMR spectrum of product **4** (2-nitrobenzyl alcohol) in  $\text{CDCl}_3$  solvent where \* represents the residual solvent peak.

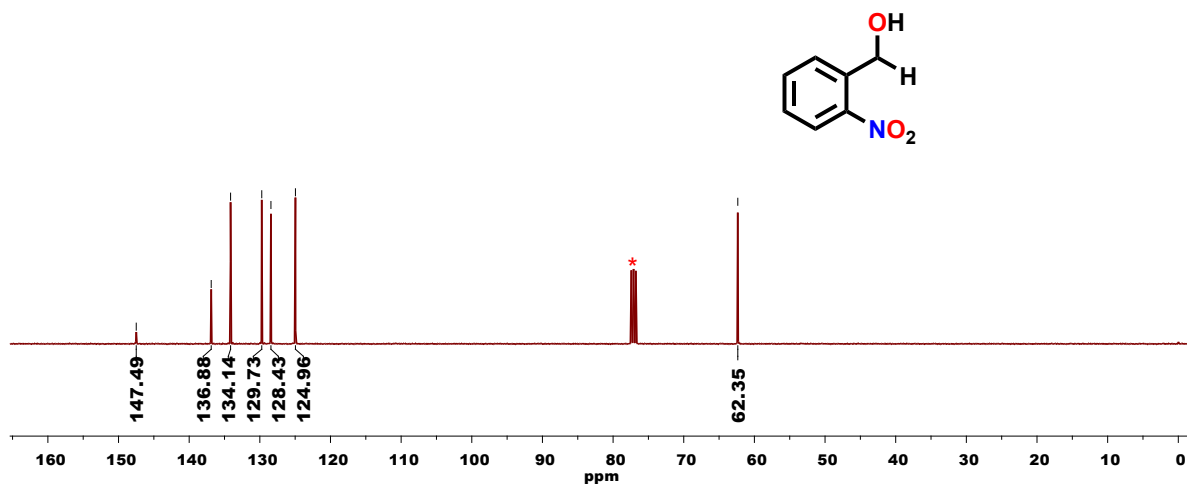

**Figure S26.** <sup>13</sup>C NMR spectrum of product 4 (2-nitrobenzyl alcohol) in CDCl<sub>3</sub> solvent where \* represents the residual solvent peak.

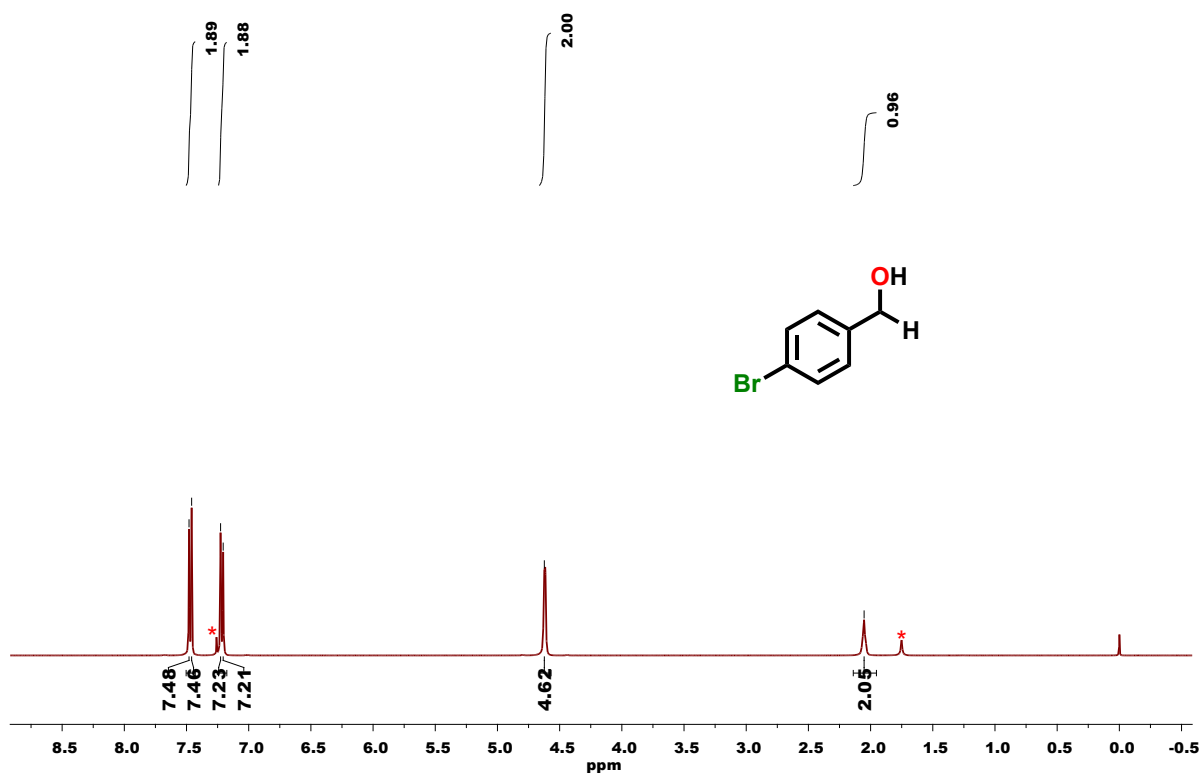

**Figure S27.** <sup>1</sup>H NMR spectrum of product 5 (4-bromobenzyl alcohol) in CDCl<sub>3</sub> solvent where \* represents the residual solvent peak.

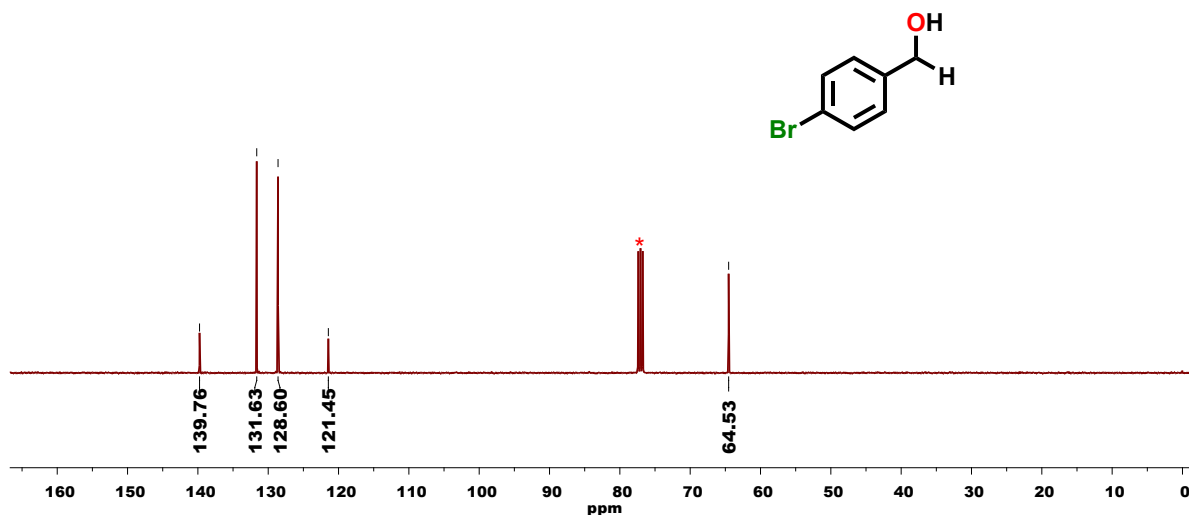

**Figure S28.**  $^{13}\text{C}$  NMR spectrum of product **5** (4-bromobenzyl alcohol) in  $\text{CDCl}_3$  solvent where \* represents the residual solvent peak.

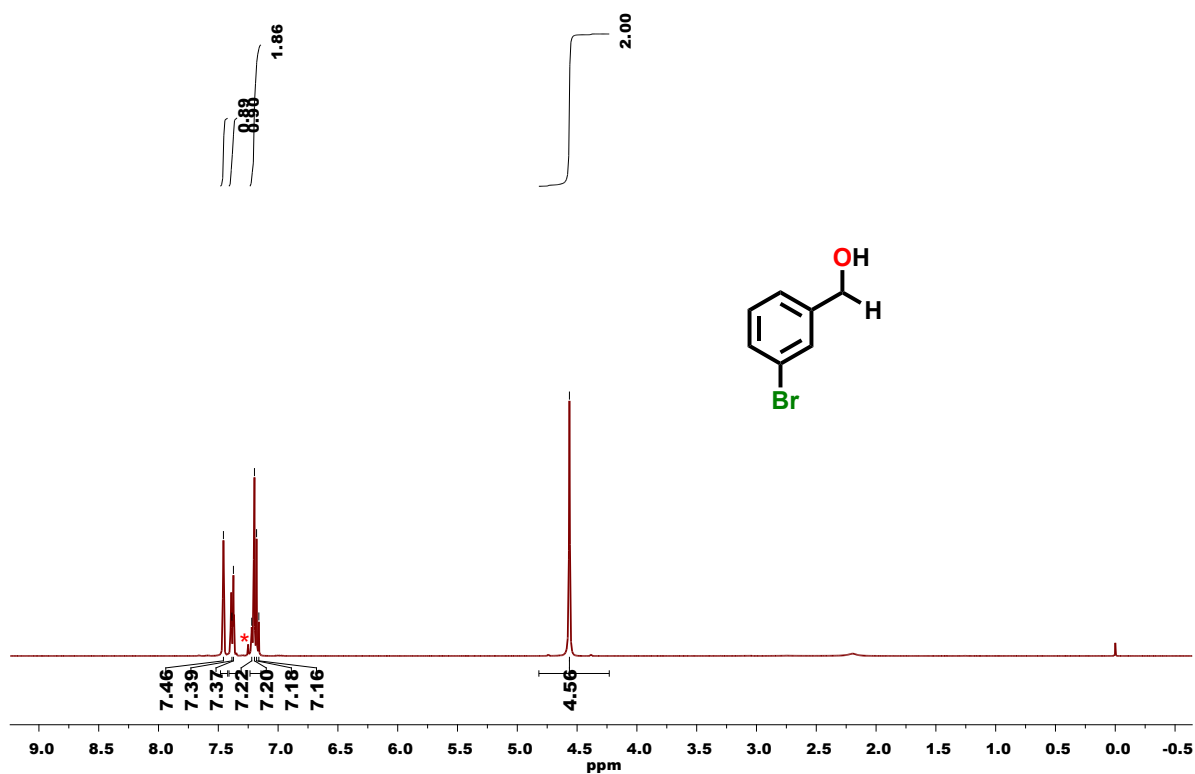

**Figure S29.**  $^1\text{H}$  NMR spectrum of product **6** (3-bromobenzyl alcohol) in  $\text{CDCl}_3$  solvent where \* represents the residual solvent peak.



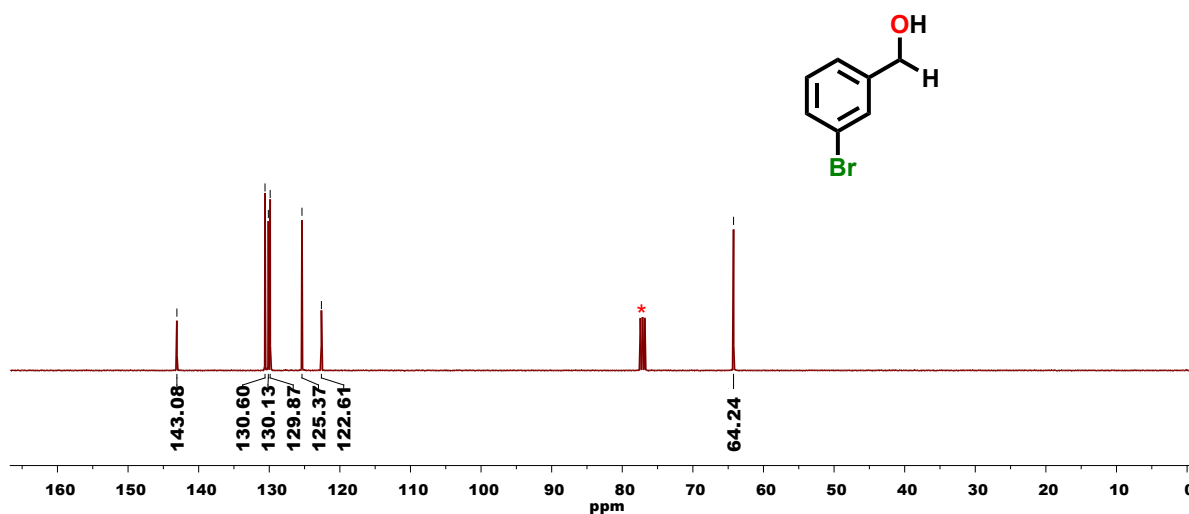

**Figure S30.**  $^{13}\text{C}$  NMR spectrum of product **6** (3-bromobenzyl alcohol) in  $\text{CDCl}_3$  solvent where \* represents the residual solvent peak.

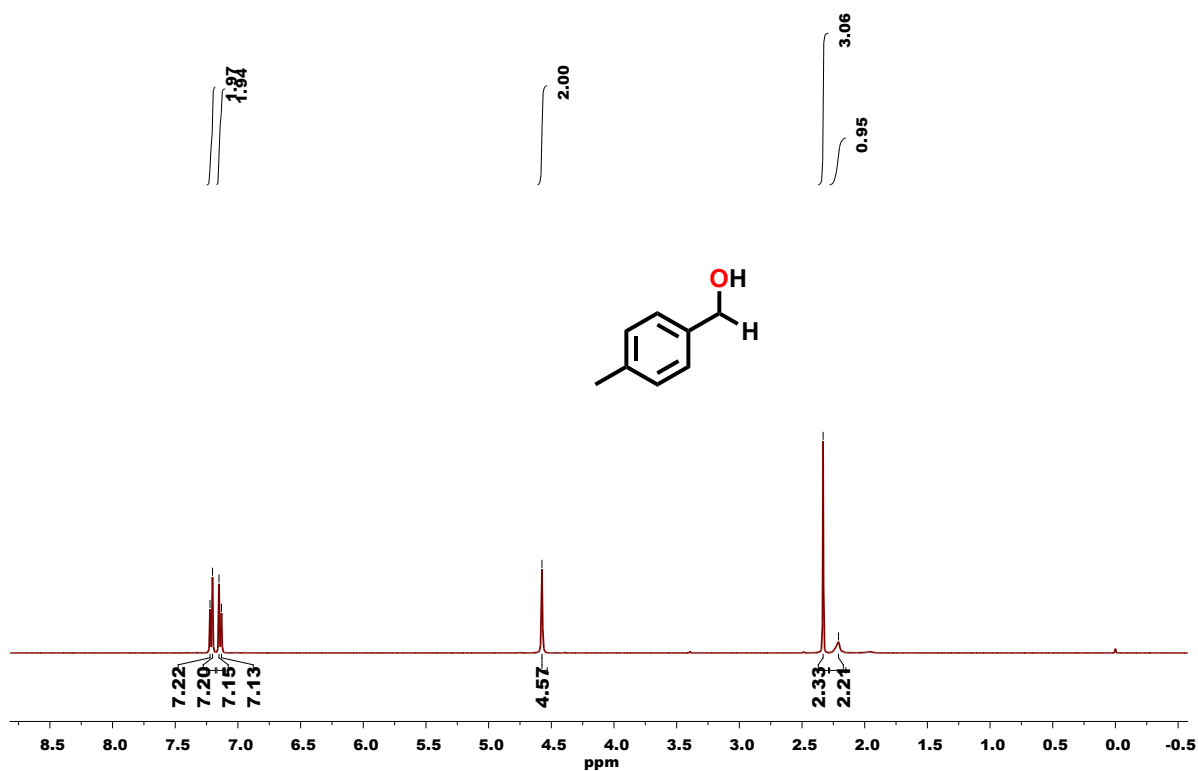

**Figure S31.**  $^1\text{H}$  NMR spectrum of product **7** (4-methylbenzyl alcohol) in  $\text{CDCl}_3$  solvent where \* represents the residual solvent peak.

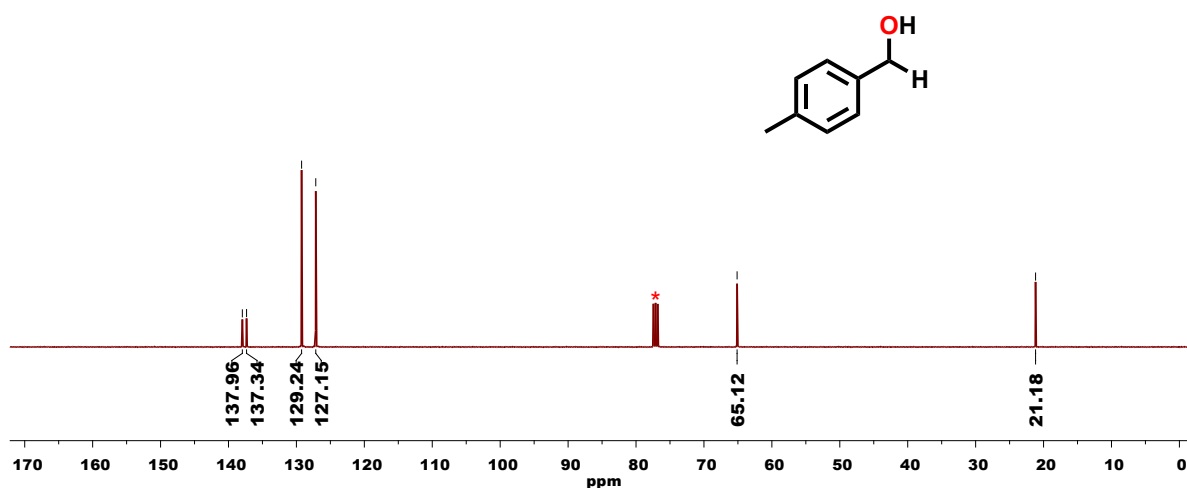

**Figure S32.** <sup>13</sup>C NMR spectrum of product **7** (4-methylbenzyl alcohol) in CDCl<sub>3</sub> solvent where \* represents the residual solvent peak.

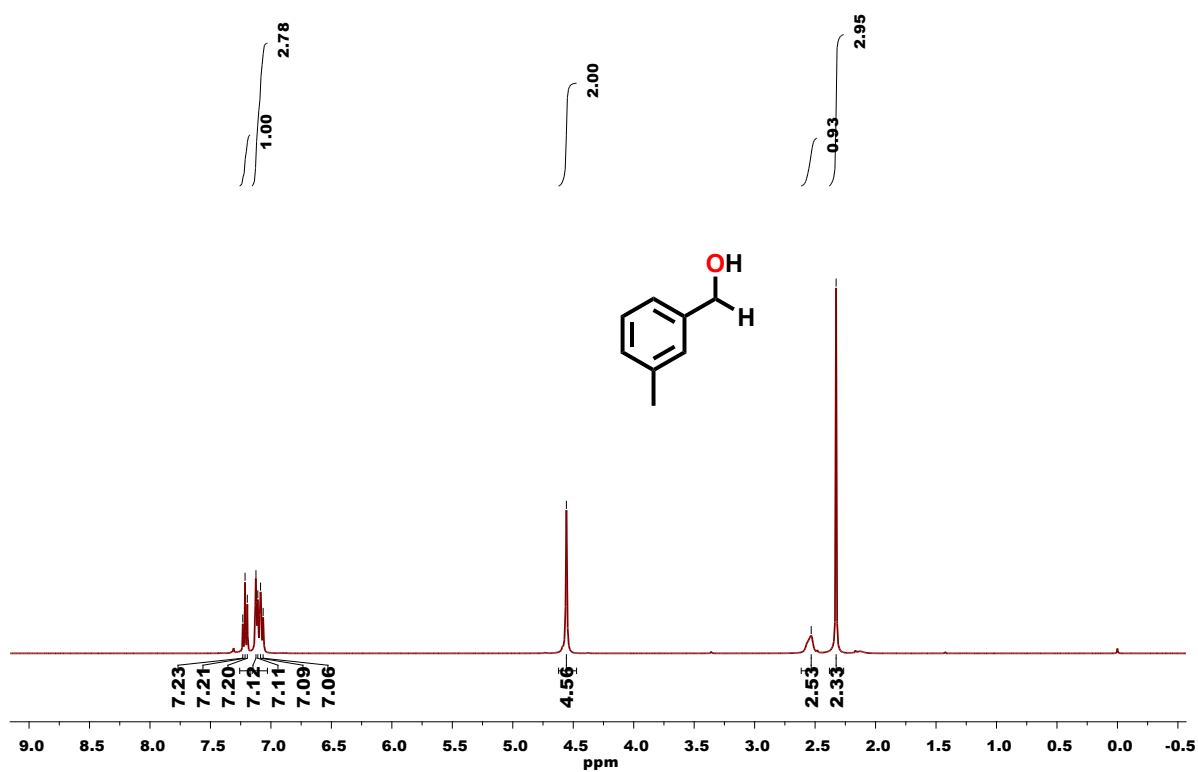

**Figure S33.** <sup>1</sup>H NMR spectrum of product **8** (3-methylbenzyl alcohol) in CDCl<sub>3</sub> solvent where \* represents the residual solvent peak.

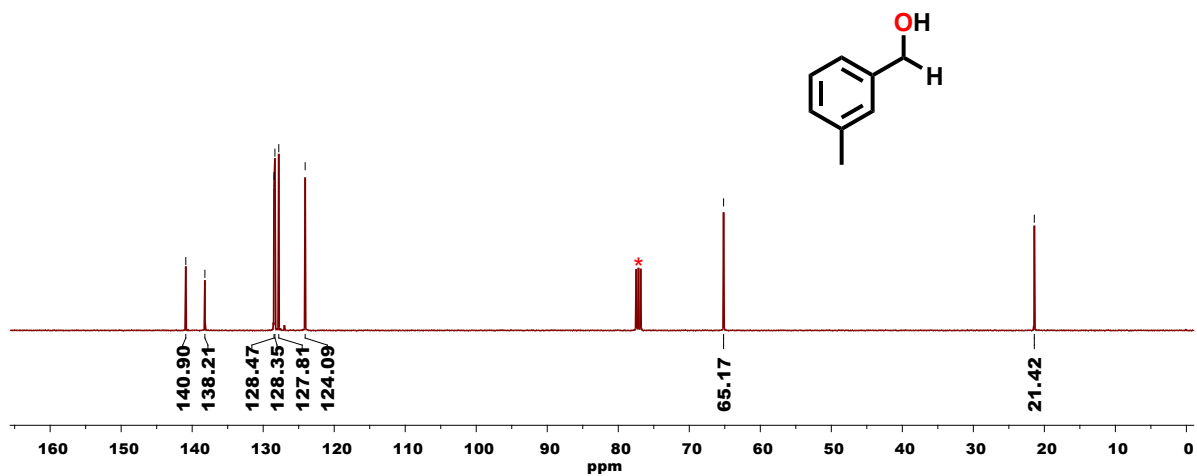

**Figure S34.**  $^{13}\text{C}$  NMR spectrum of product **8** (3-methylbenzyl alcohol) in  $\text{CDCl}_3$  solvent where \* represents the residual solvent peak.

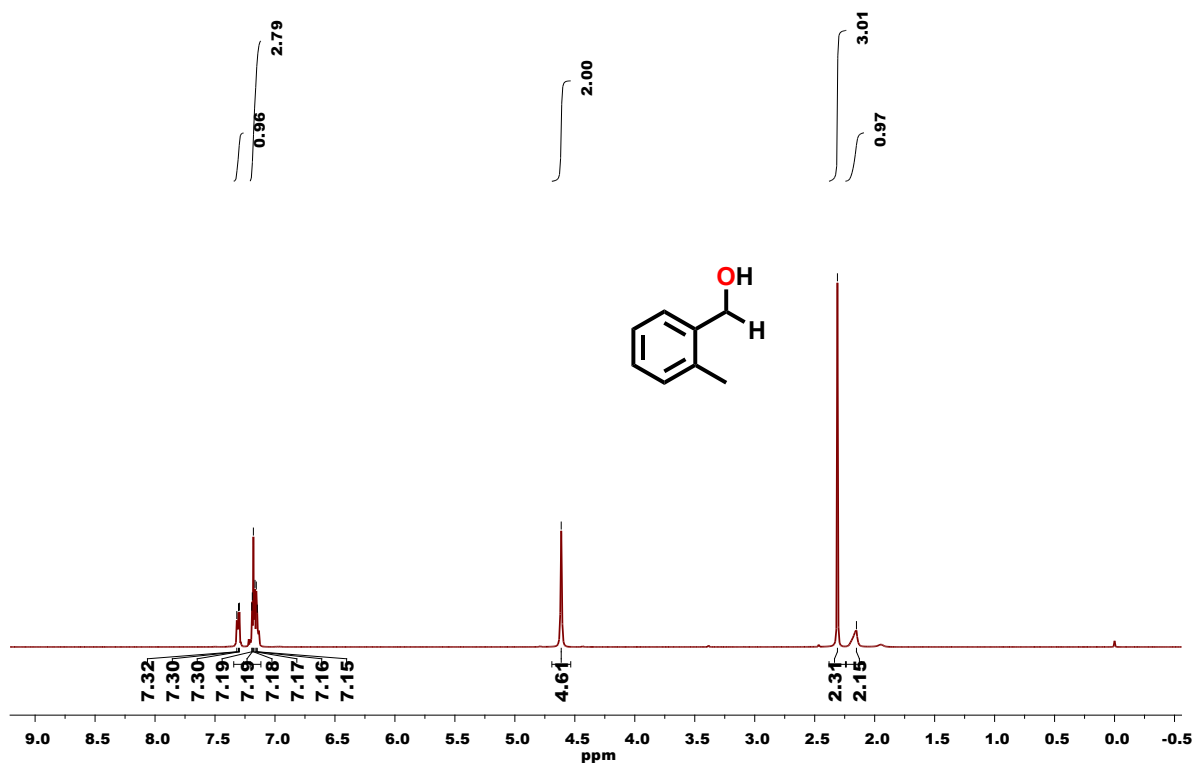

**Figure S35.**  $^1\text{H}$  NMR spectrum of product **9** (2-methylbenzyl alcohol) in  $\text{CDCl}_3$  solvent where \* represents the residual solvent peak.

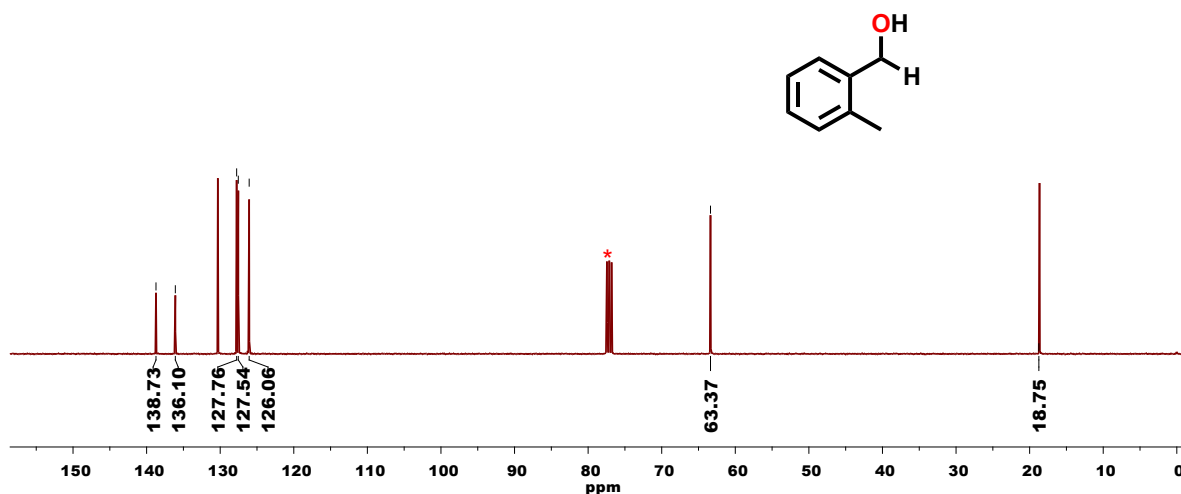

**Figure S36.**  $^{13}\text{C}$  NMR spectrum of product **9** (2-methylbenzyl alcohol) in  $\text{CDCl}_3$  solvent where \* represents the residual solvent peak.

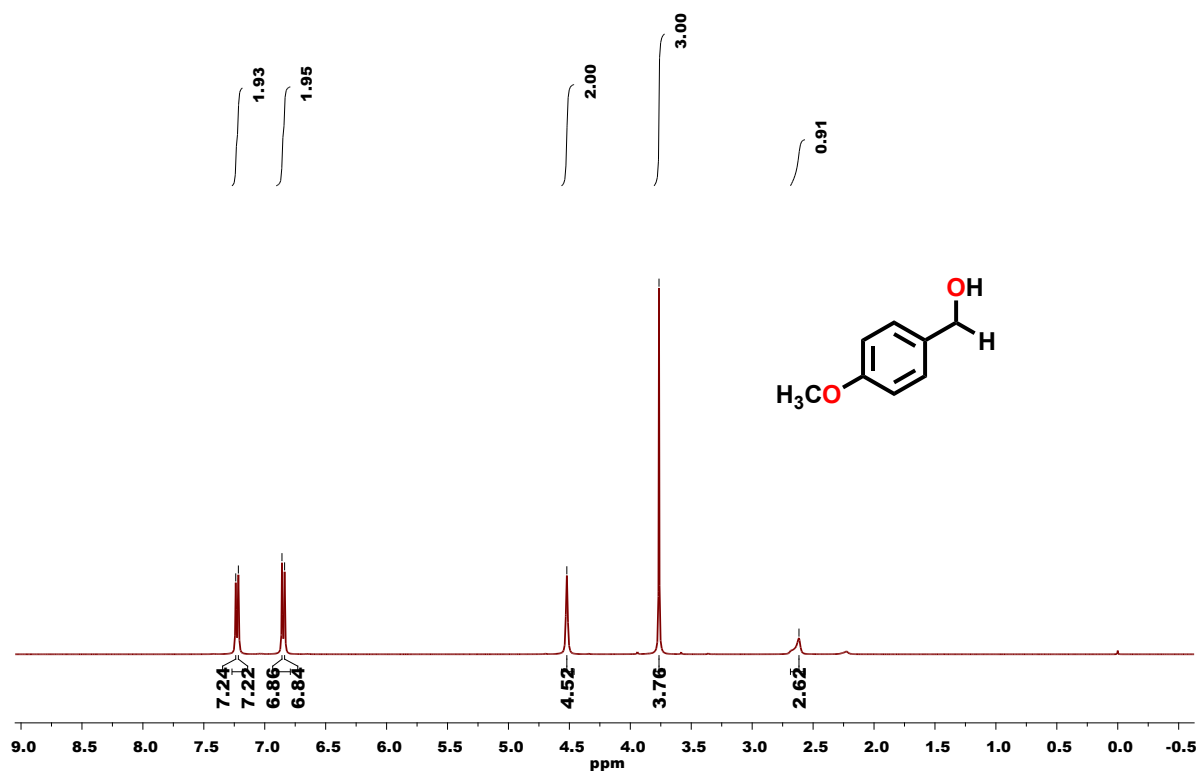

**Figure S37.**  $^1\text{H}$  NMR spectrum of product **10** (4-methoxybenzyl alcohol) in  $\text{CDCl}_3$  solvent where \* represents the residual solvent peak.

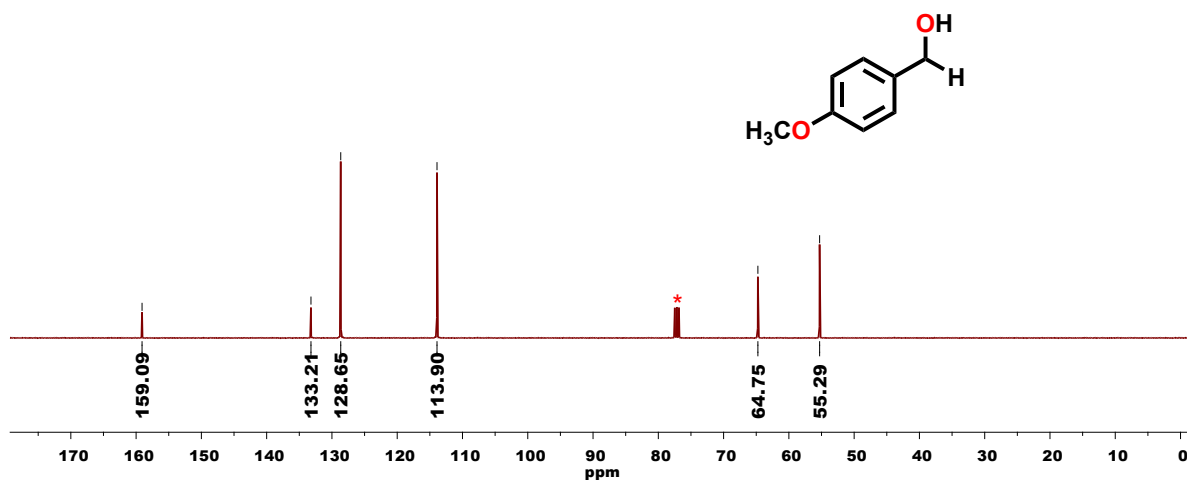

**Figure S38.**  $^{13}\text{C}$  NMR spectrum of product **10** (4-methoxybenzyl alcohol) in  $\text{CDCl}_3$  solvent where \* represents the residual solvent peak.

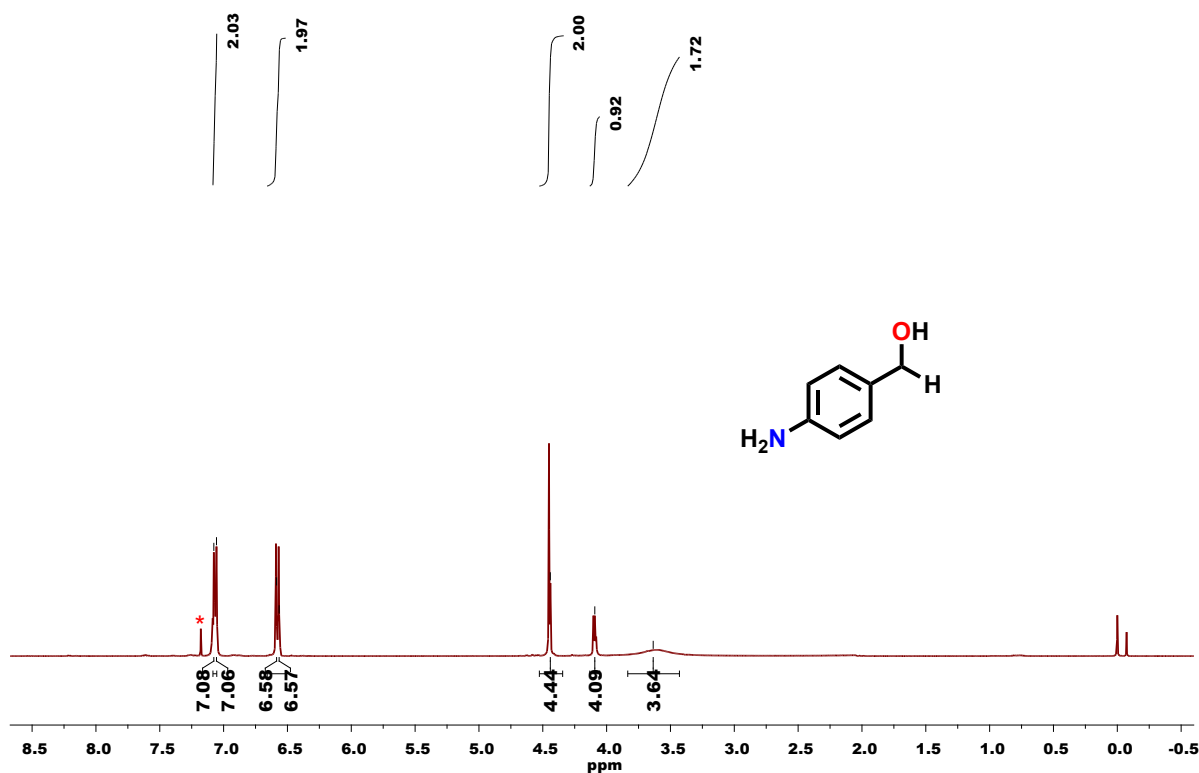

**Figure S39.**  $^1\text{H}$  NMR spectrum of product **11** (4-aminobenzyl alcohol) in  $\text{CDCl}_3$  solvent where \* represents the residual solvent peak.

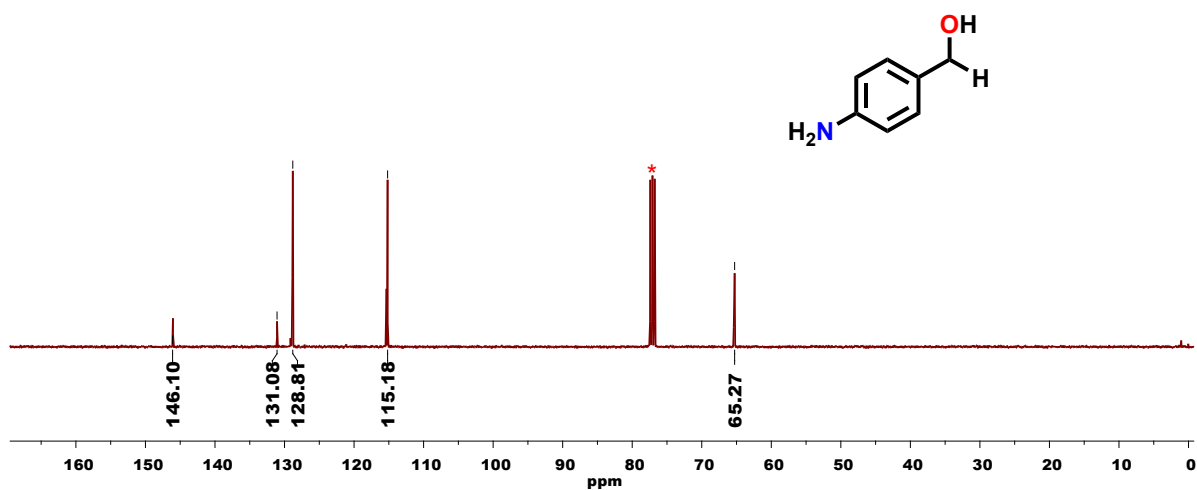

**Figure S40.**  $^{13}\text{C}$  NMR spectrum of product **11** (4-aminobenzyl alcohol) in  $\text{CDCl}_3$  solvent where \* represents the residual solvent peak.

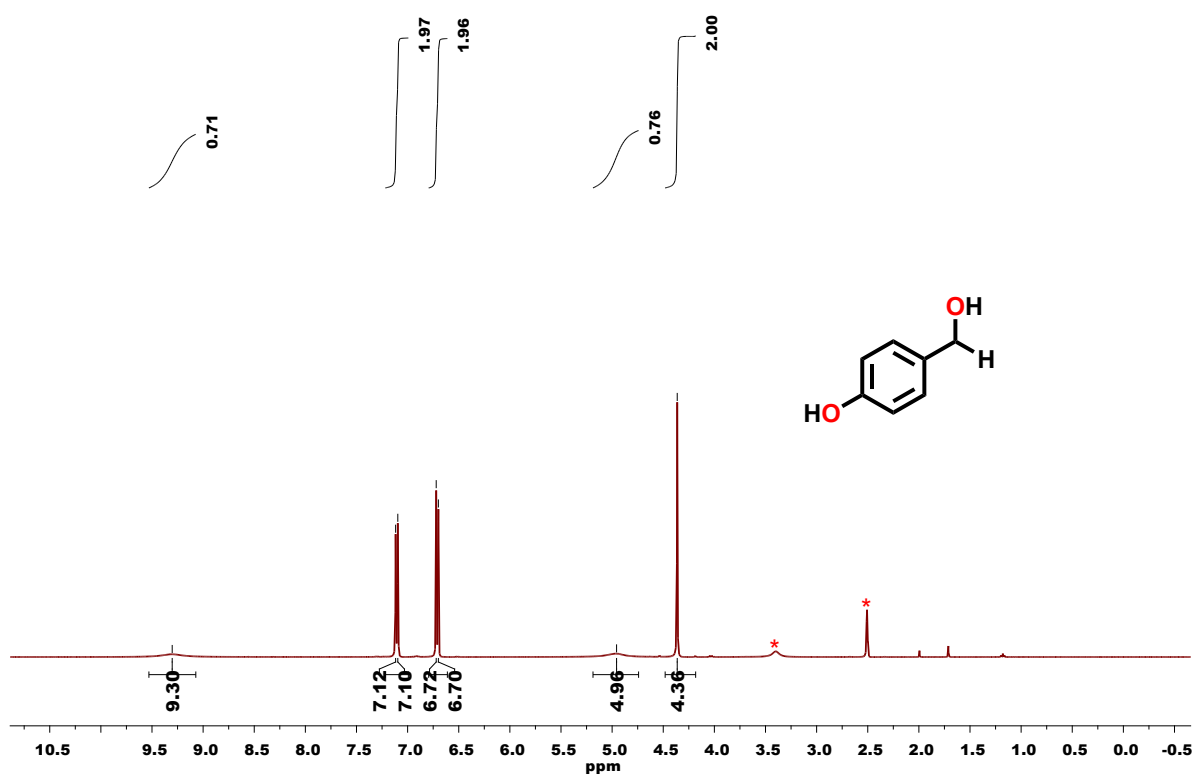

**Figure S41.**  $^1\text{H}$  NMR spectrum of product **12** (4-hydroxybenzyl alcohol) in  $(\text{DMSO-}d_6)$  solvent where \* represents the residual solvent and/or adventitious water peaks.

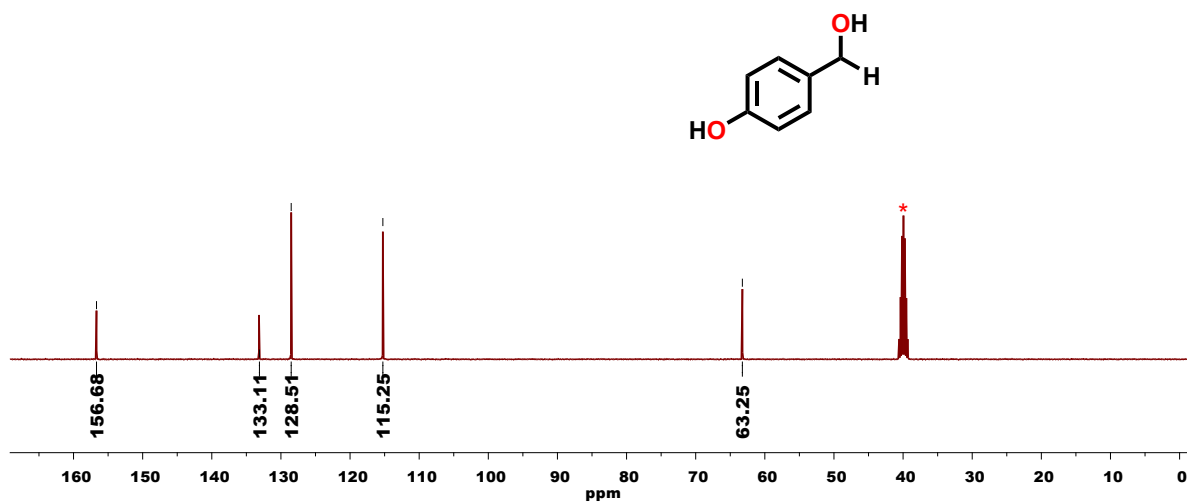

**Figure S42.**  $^{13}\text{C}$  NMR spectrum of product **12** (4-hydroxybenzyl alcohol) in (DMSO- $d_6$ ) solvent where \* represents the residual solvent peak.

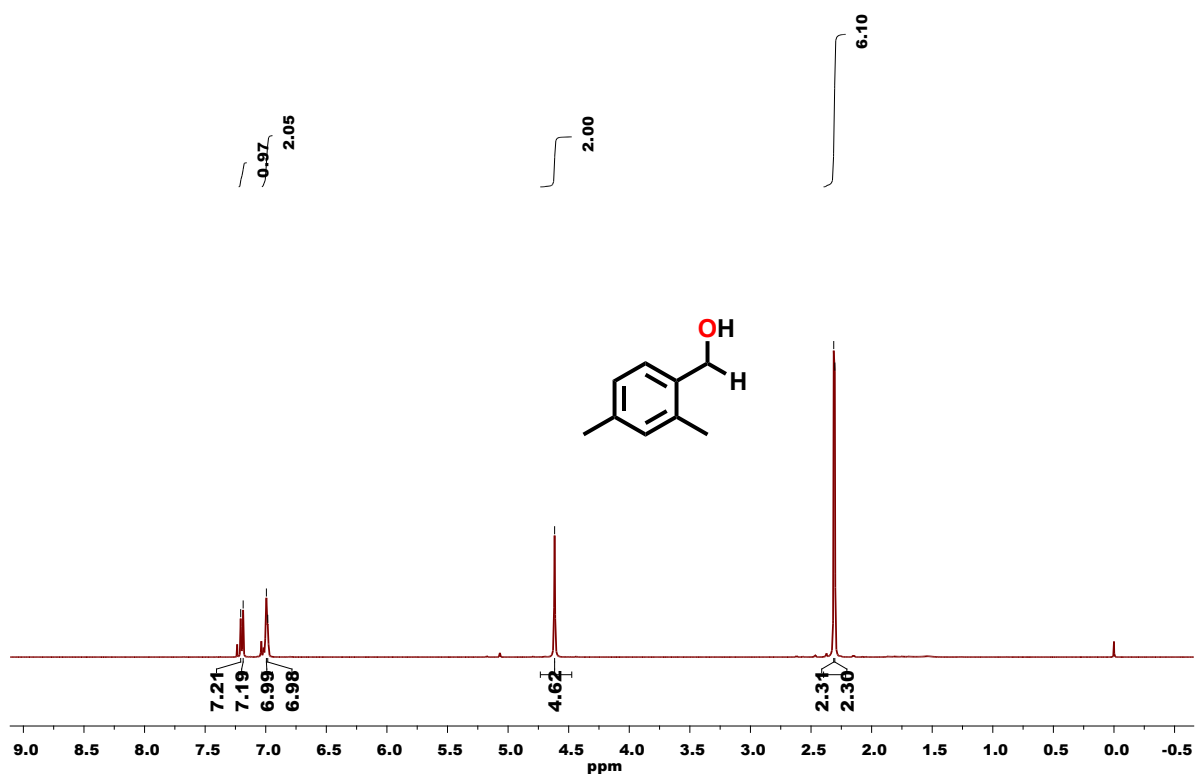

**Figure S43.**  $^1\text{H}$  NMR spectrum of product **13** (2,5-dimethylbenzyl alcohol) in  $\text{CDCl}_3$  solvent where \* represents the residual solvent peak.

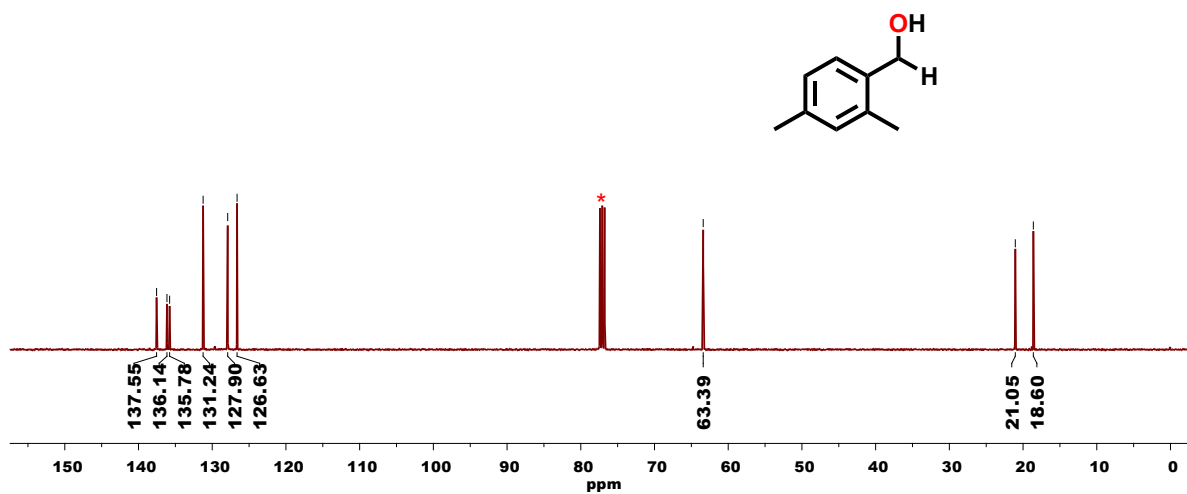

**Figure S44.** <sup>13</sup>C NMR spectrum of product **13** (2,5-dimethylbenzyl alcohol) in CDCl<sub>3</sub> solvent where \* represents the residual solvent peak.

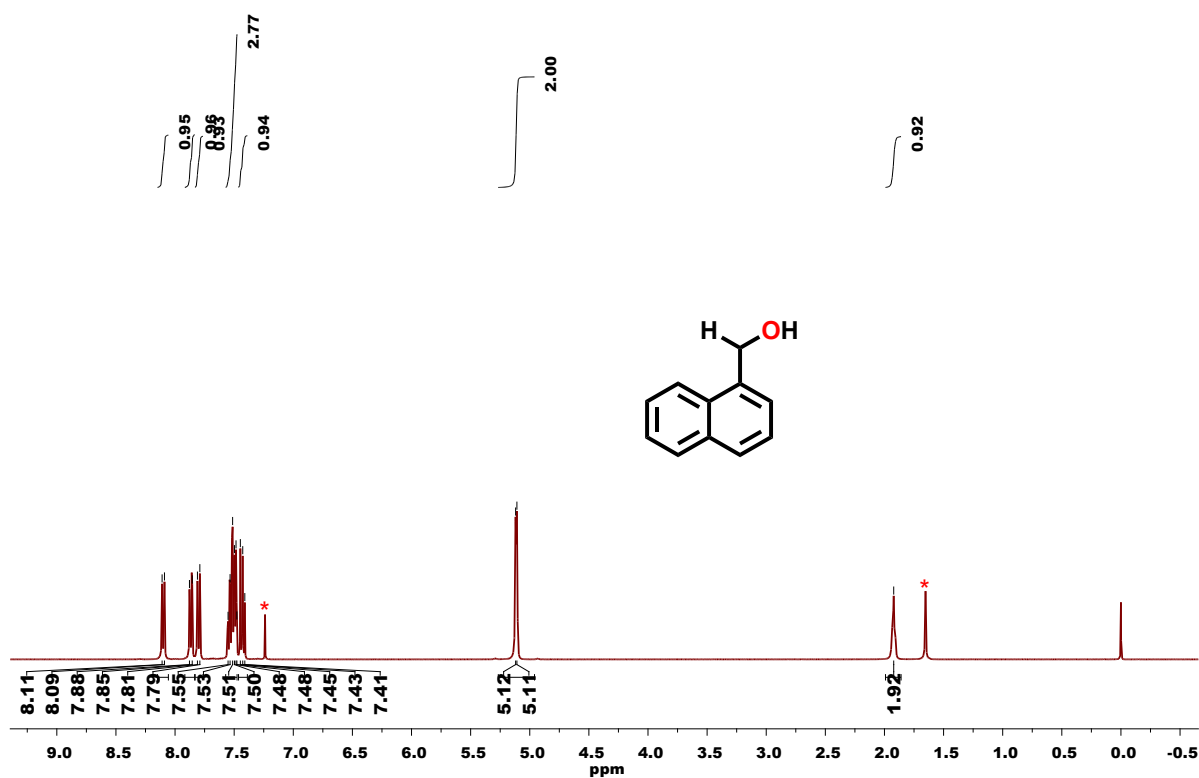

**Figure S45.** <sup>1</sup>H NMR spectrum of product **14** (1-naphthalenemethanol) in CDCl<sub>3</sub> solvent where \* represents the residual solvent peak.



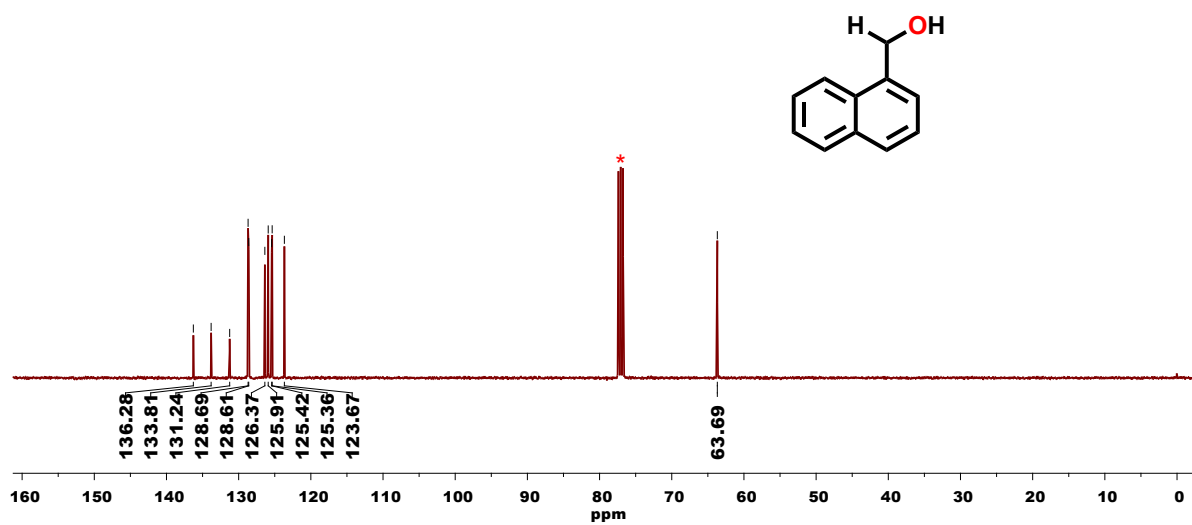

**Figure S46.** <sup>13</sup>C NMR spectrum of product **14** (1-naphthalenemethanol) in CDCl<sub>3</sub> solvent where \* represents the residual solvent peak.

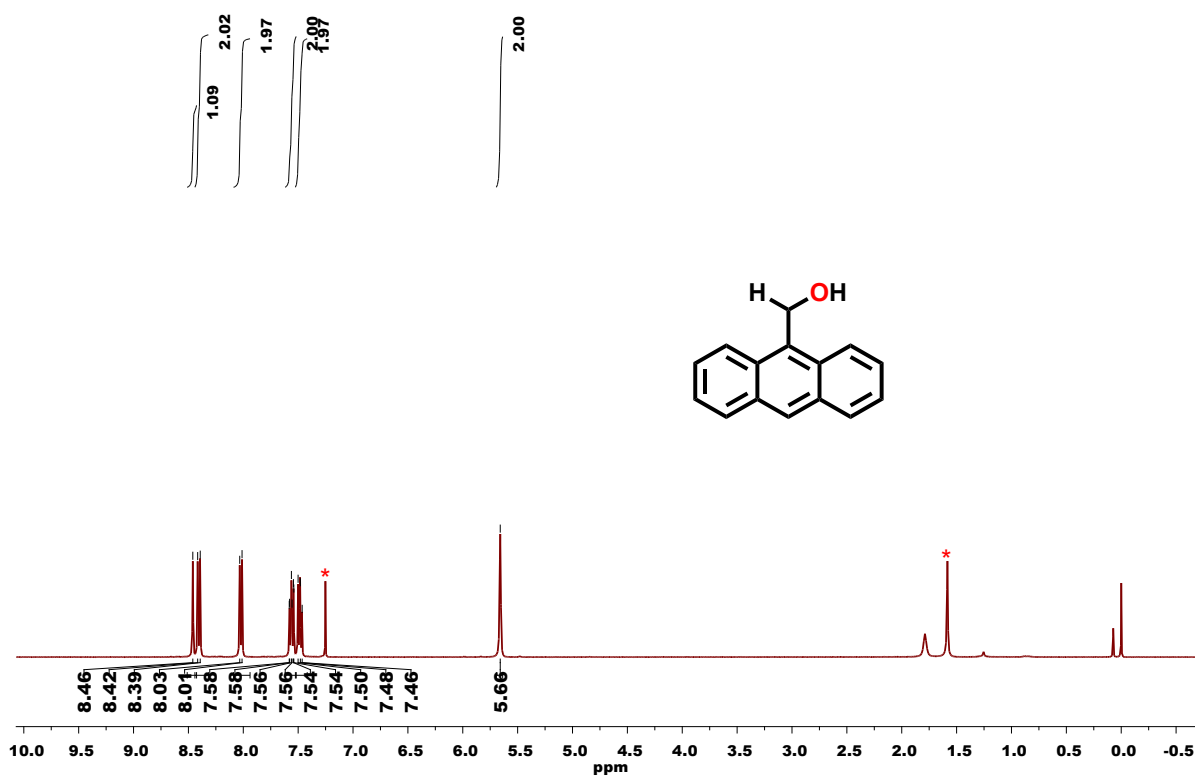

**Figure S47.** <sup>1</sup>H NMR spectrum of product **15** (9-anthracenemethanol) in CDCl<sub>3</sub> solvent where \* represents the residual solvent peak and/or adventitious water peaks.

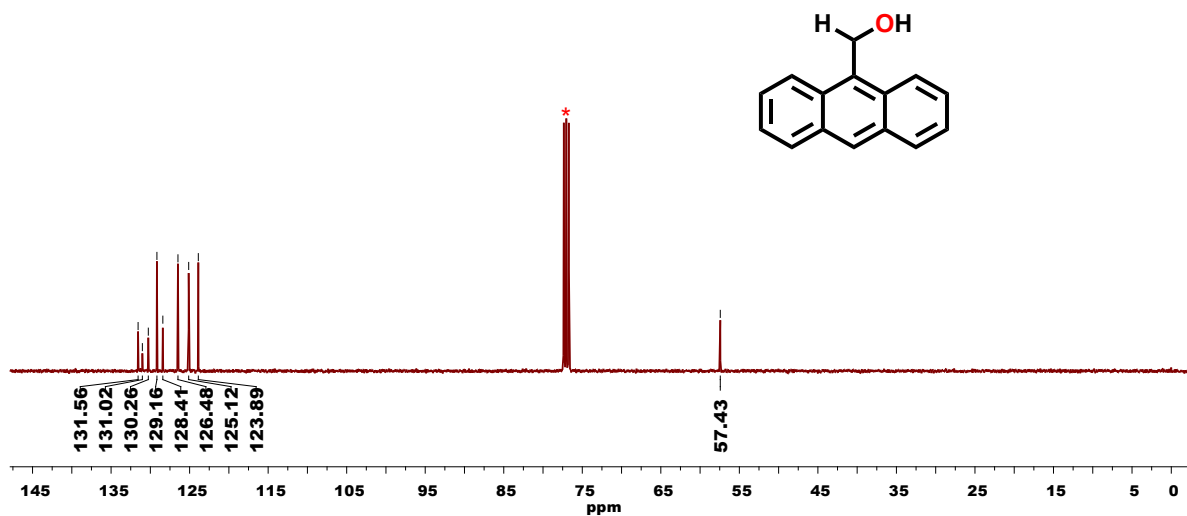

**Figure S48.**  $^{13}\text{C}$  NMR spectrum of product **15** (9-anthracenemethanol) in  $\text{CDCl}_3$  solvent where \* represents the residual solvent peak.

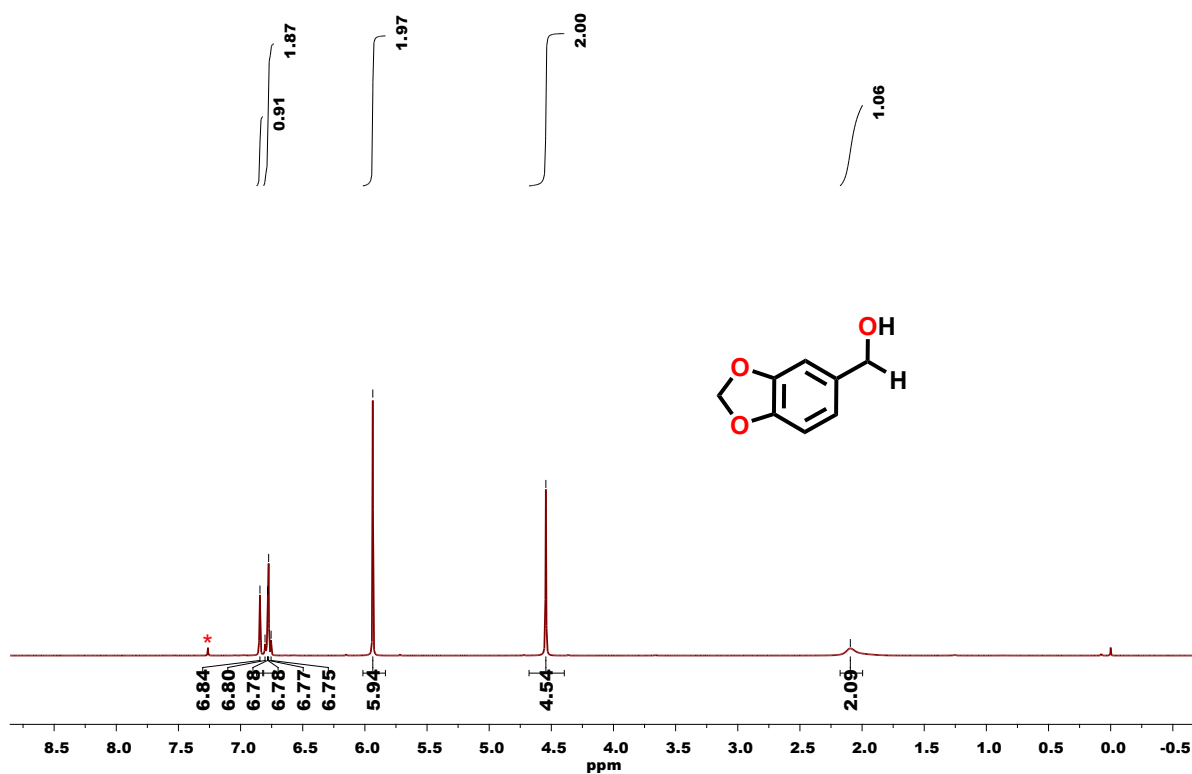

**Figure S49.**  $^1\text{H}$  NMR spectrum of product **16** (1,3-benzodioxol-5-ylmethanol) in  $\text{CDCl}_3$  solvent where \* represents the residual solvent peak.

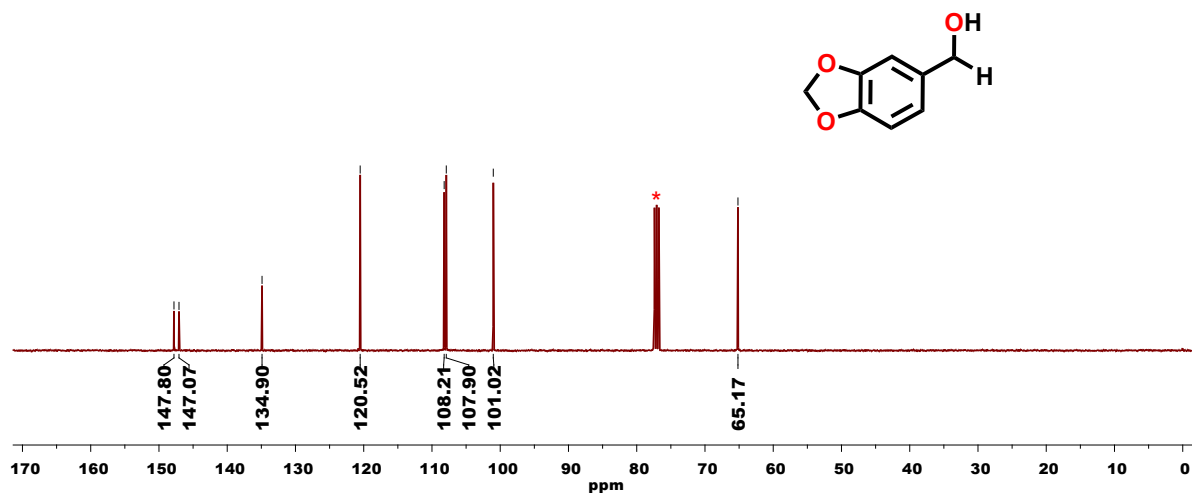

**Figure S50.**  $^{13}\text{C}$  NMR spectrum of product **16** (1,3-benzodioxol-5-ylmethanol) in  $\text{CDCl}_3$  solvent where \* represents the residual solvent peak.

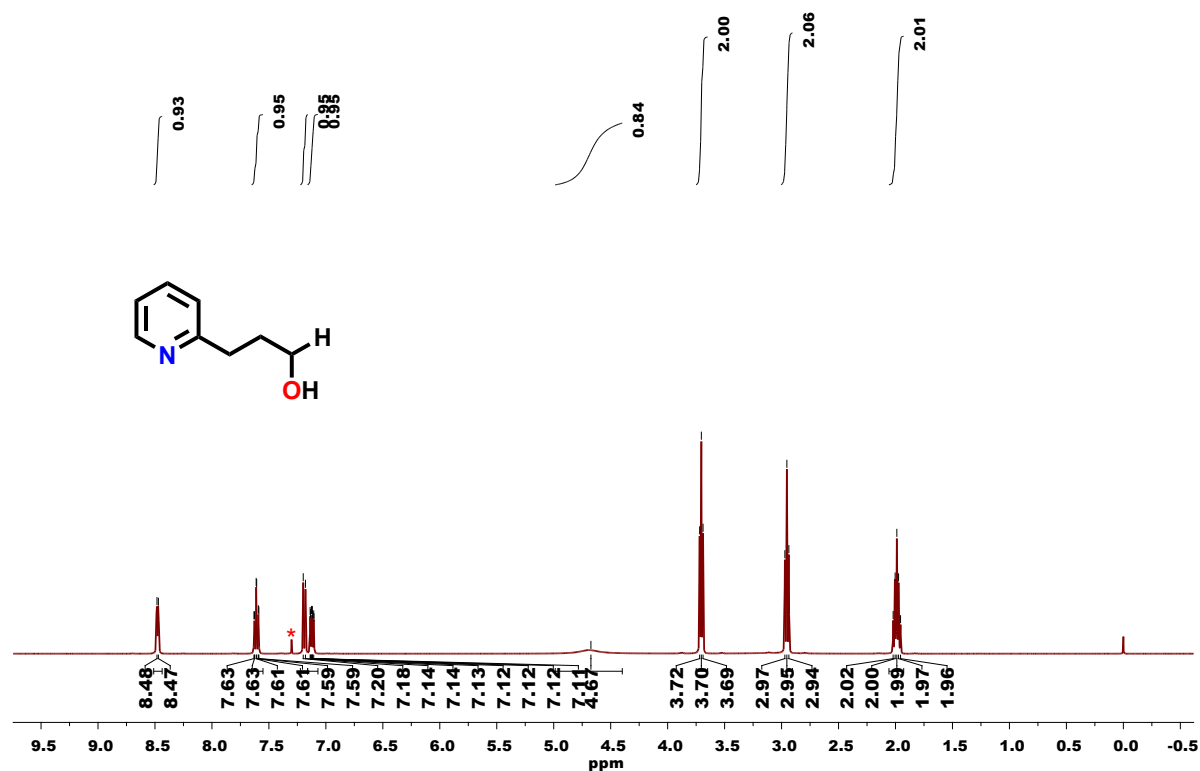

**Figure S51.**  $^1\text{H}$  NMR spectrum of product **17** (2-pyridinepropanol) in  $\text{CDCl}_3$  solvent where \* represents the residual solvent peak.

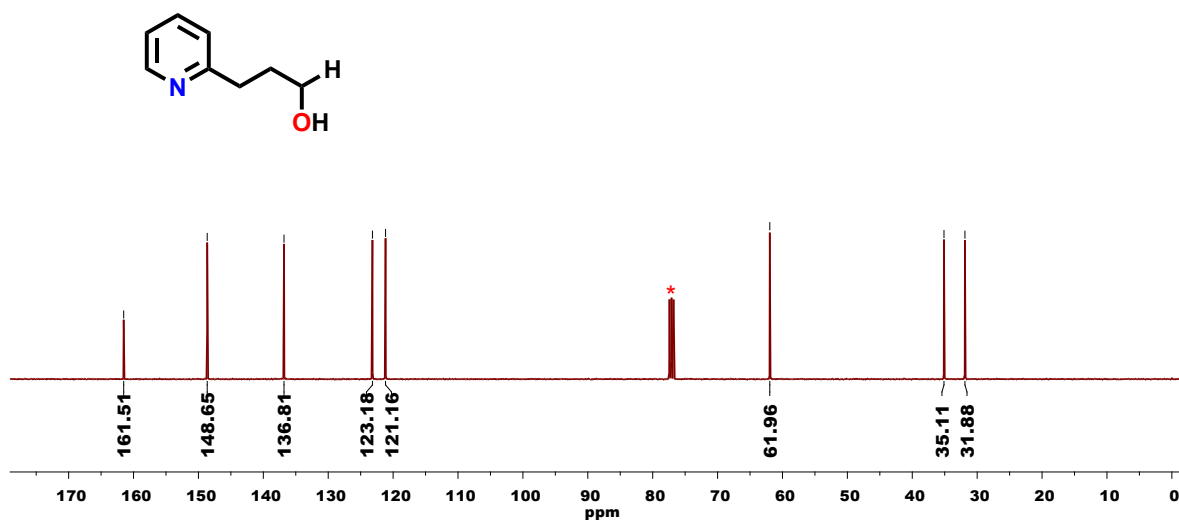

**Figure S52.** <sup>13</sup>C NMR spectrum of product **17** (2-pyridinepropanol) in CDCl<sub>3</sub> solvent where \* represents the residual solvent peak.

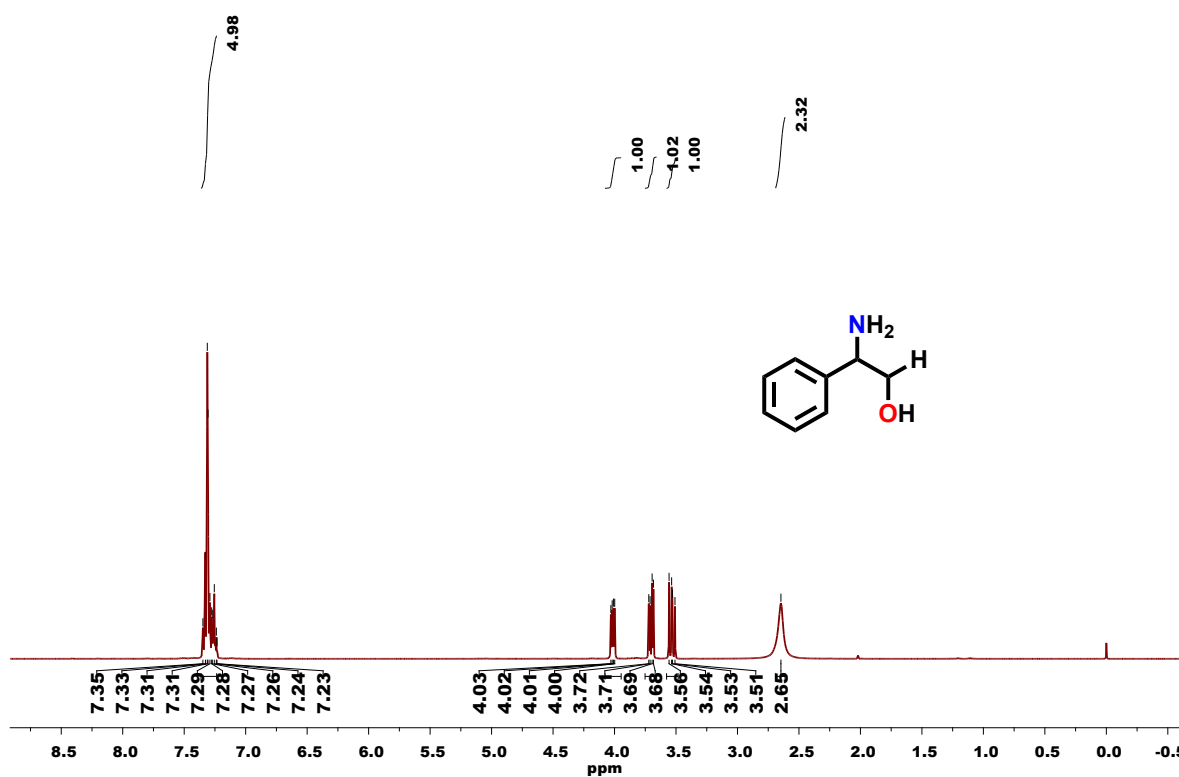

**Figure S53.** <sup>1</sup>H NMR spectrum of product **18** (2-amino-2-phenylethanol) in CDCl<sub>3</sub> solvent where \* represents the residual solvent peak.

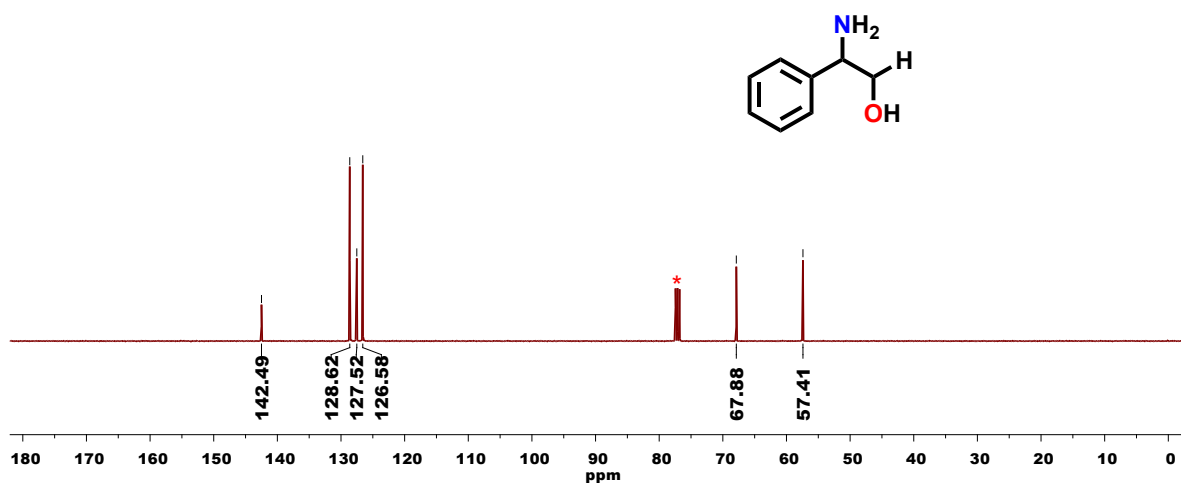

**Figure S54.** <sup>13</sup>C NMR spectrum of product **18** (2-amino-2-phenylethanol) in CDCl<sub>3</sub> solvent where \* represents the residual solvent peak.

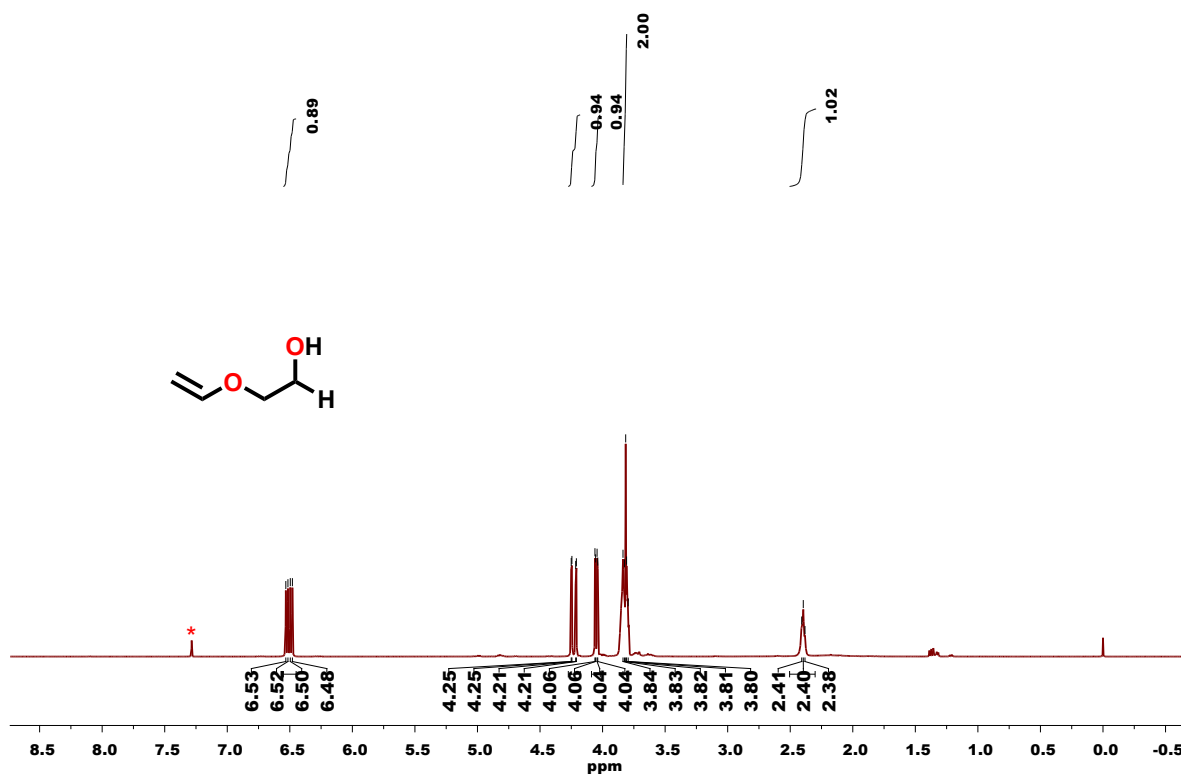

**Figure S55.** <sup>1</sup>H NMR spectrum of product **19** (2-(vinylloxy)ethanol) in CDCl<sub>3</sub> solvent where \* represents the residual solvent peak.

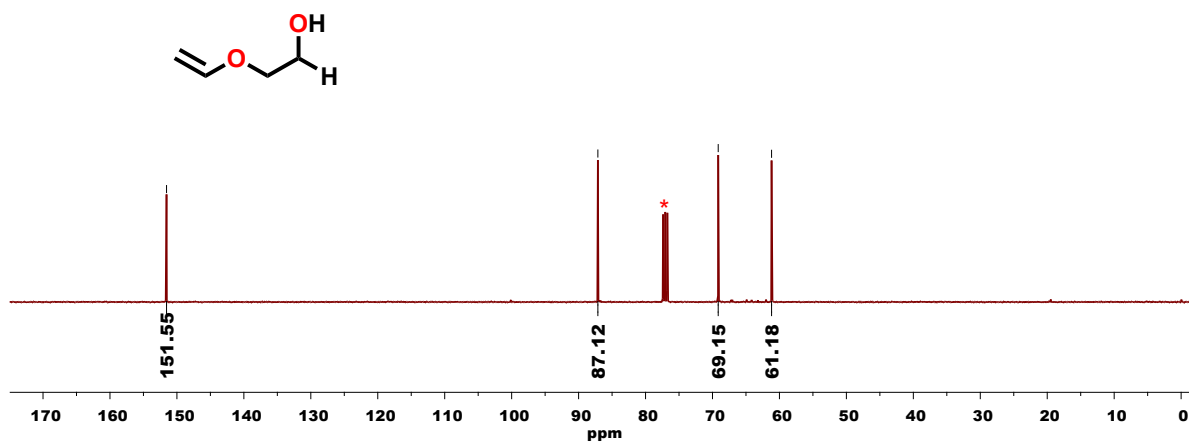

**Figure S56.** <sup>13</sup>C NMR spectrum of product **19** (2-(vinylloxy)ethanol) in CDCl<sub>3</sub> solvent where \* represents the residual solvent peak.

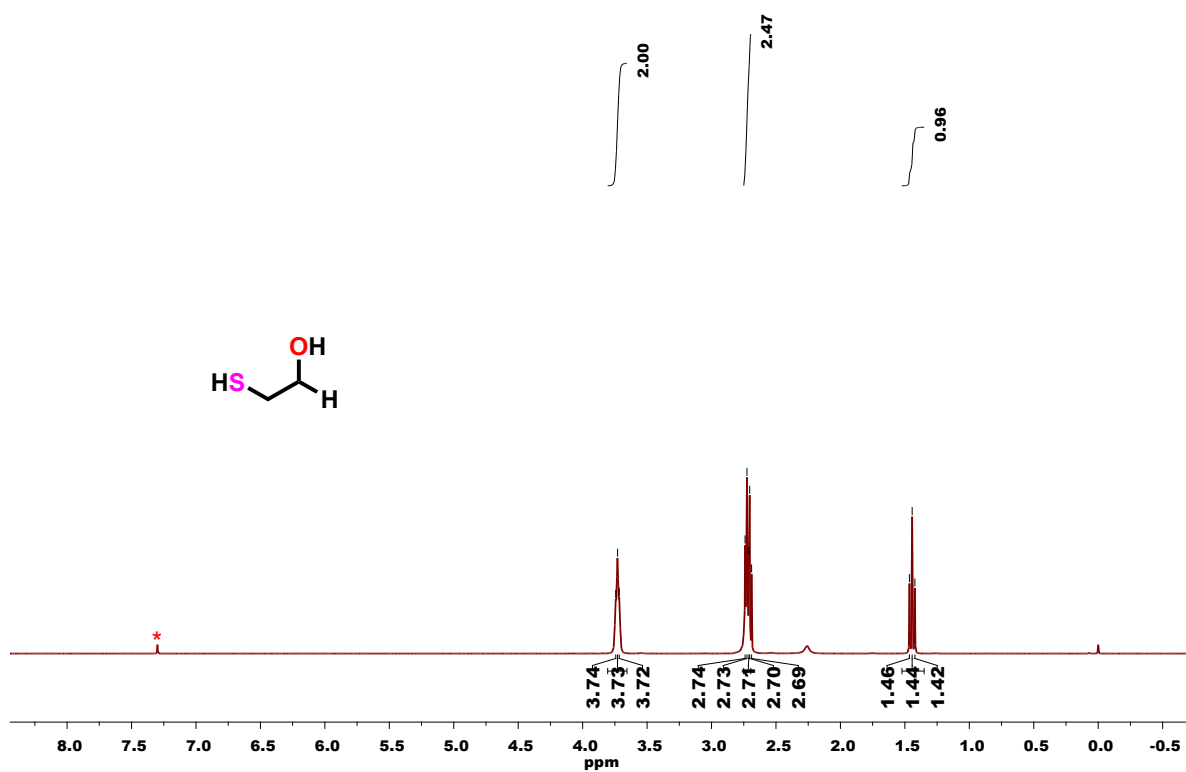

**Figure S57.** <sup>1</sup>H NMR spectrum of product **20** (2-mercaptoethanol) in CDCl<sub>3</sub> solvent where \* represents the residual solvent peak.

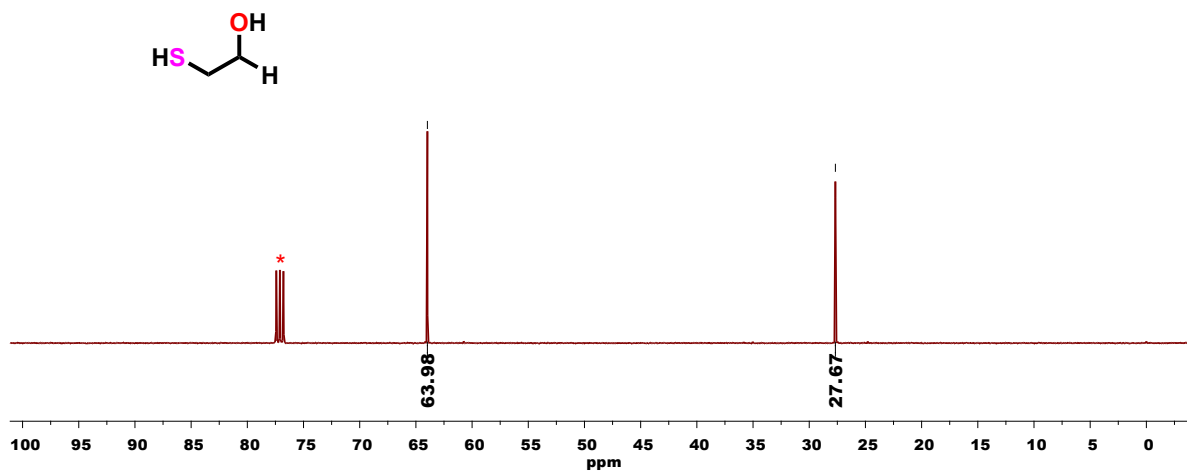

**Figure S58.** <sup>13</sup>C NMR spectrum of product **20** (2-mercaptoethanol) in CDCl<sub>3</sub> solvent where \* represents the residual solvent peak.

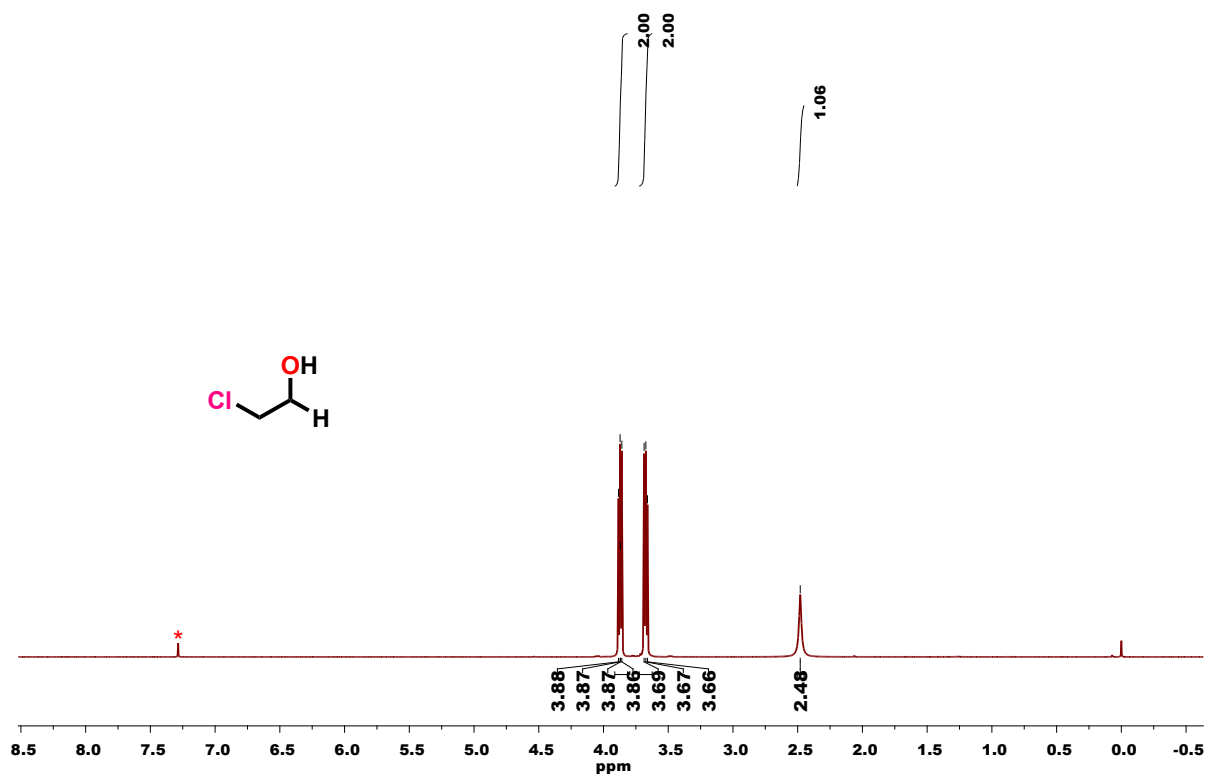

**Figure S59.** <sup>1</sup>H NMR spectrum of product **21** (2-chloroethanol) in CDCl<sub>3</sub> solvent where \* represents the residual solvent peak.

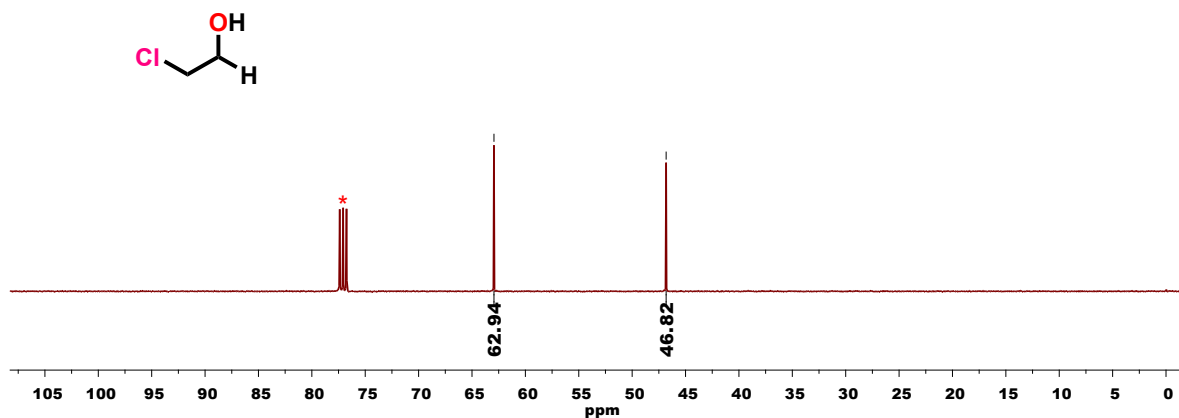

**Figure S60.**  $^{13}\text{C}$  NMR spectrum of product **21** (2-chloroethanol) in  $\text{CDCl}_3$  solvent where \* represents the residual solvent peak.

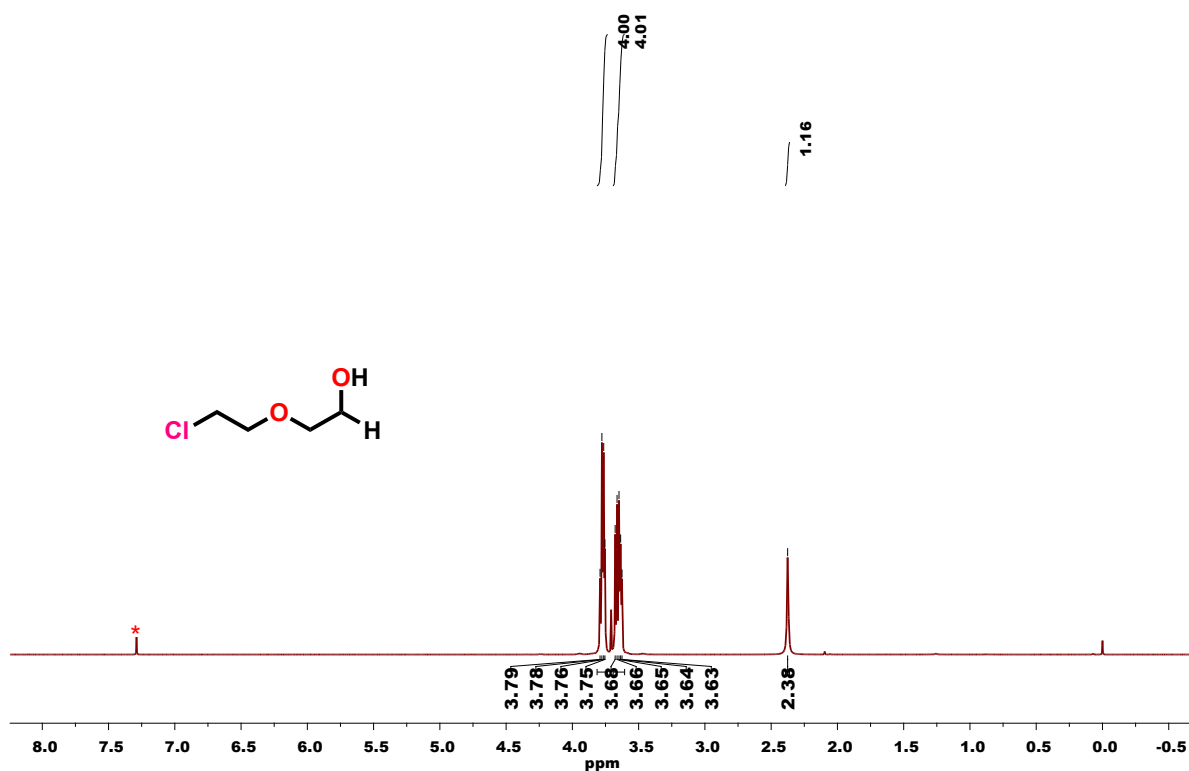

**Figure S61.**  $^1\text{H}$  NMR spectrum of product **22** (2-(2-chloroethoxy)ethanol) in  $\text{CDCl}_3$  solvent where \* represents the residual solvent peak.



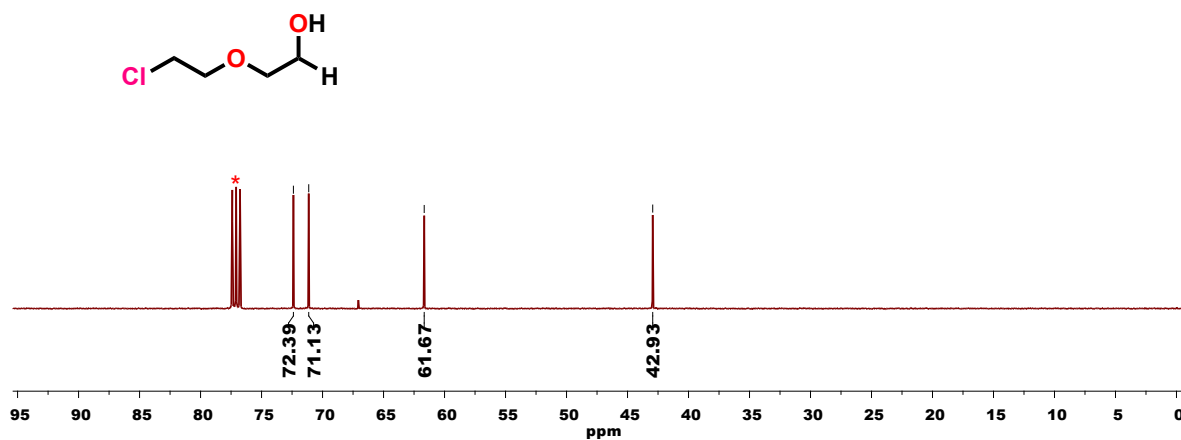

**Figure S62.** <sup>13</sup>C NMR spectrum of product **22** (2-(2-chloroethoxy)ethanol) in CDCl<sub>3</sub> solvent where \* represents the residual solvent peak.

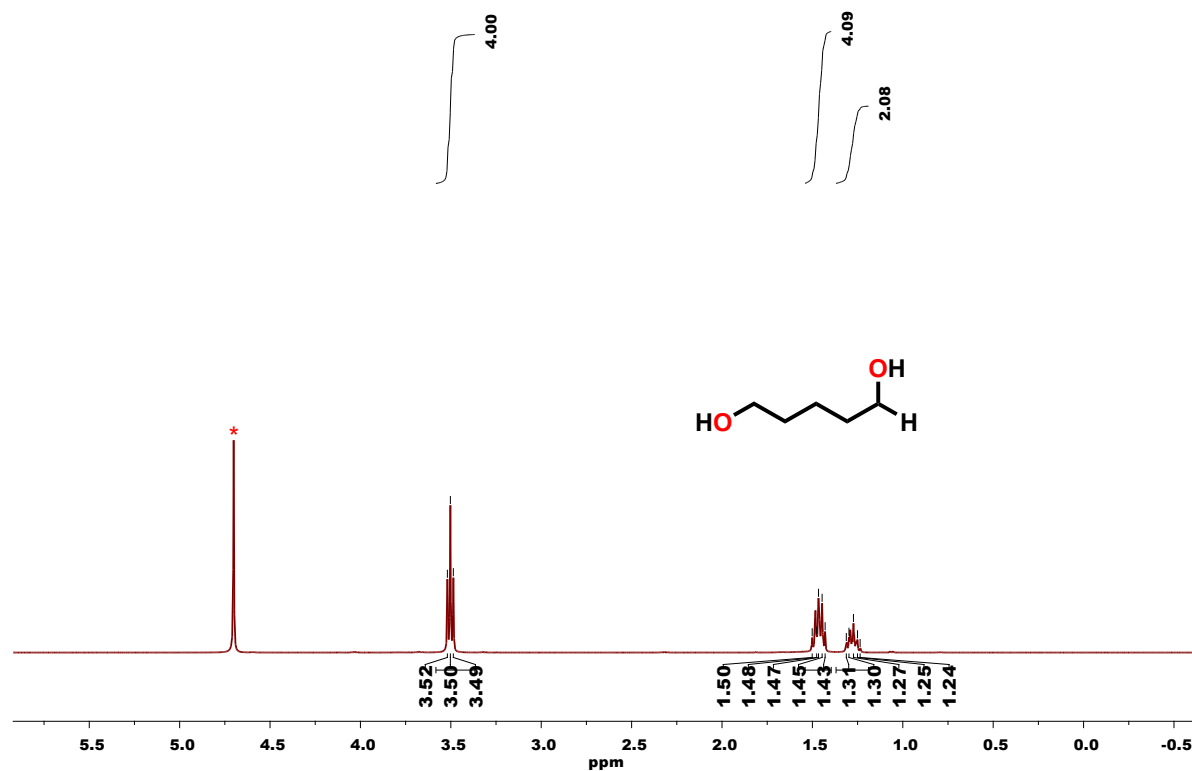

**Figure S63.** <sup>1</sup>H NMR spectrum of product **23** (1,5-pentandiol) in D<sub>2</sub>O solvent where \* represents the residual solvent peak.

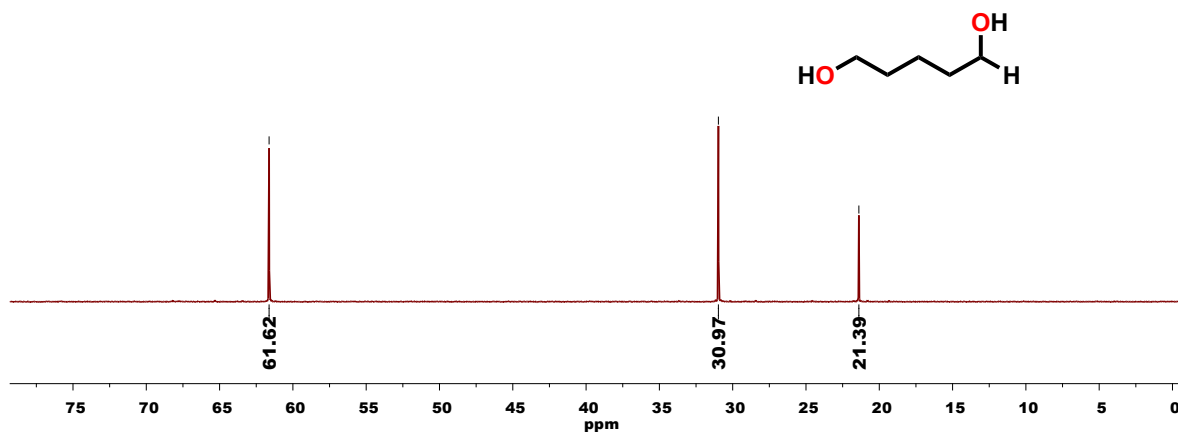

Figure S64. <sup>13</sup>C NMR spectrum of product **23** (1,5-pentanediol) in D<sub>2</sub>O solvent.

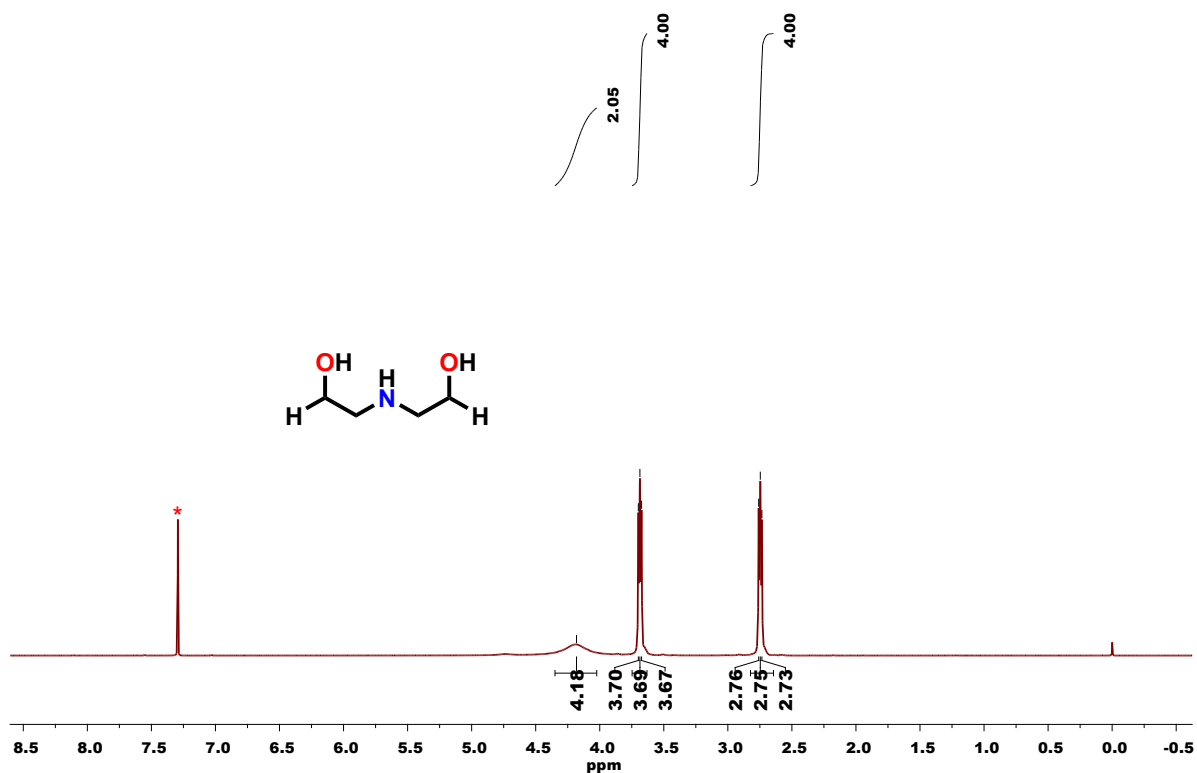

Figure S65. <sup>1</sup>H NMR spectrum of product **24** (2,2'-azanediylbis(ethan-1-ol)) in CDCl<sub>3</sub> solvent where \* represents the residual solvent peak.

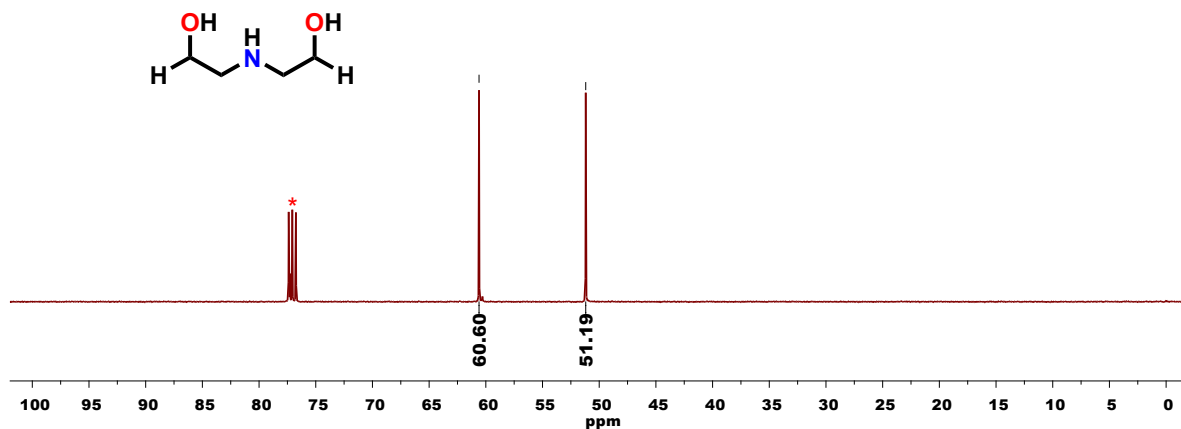

**Figure S66.**  $^{13}\text{C}$  NMR spectrum of product **24** (2,2'-azanediybis(ethan-1-ol)) in  $\text{CDCl}_3$  solvent where \* represents the residual solvent peak.

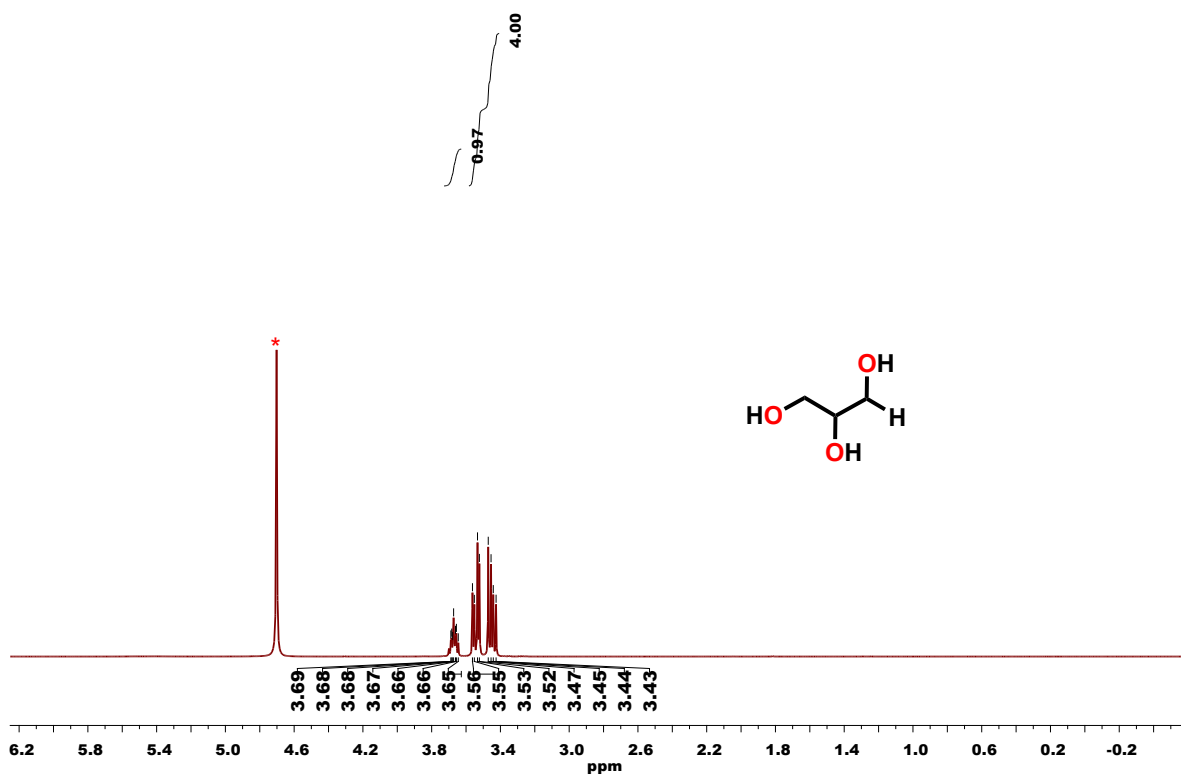

**Figure S67.**  $^1\text{H}$  NMR spectrum of product **25** (1,2,3-propanetriol) in  $\text{D}_2\text{O}$  solvent where \* represents the residual solvent peak.

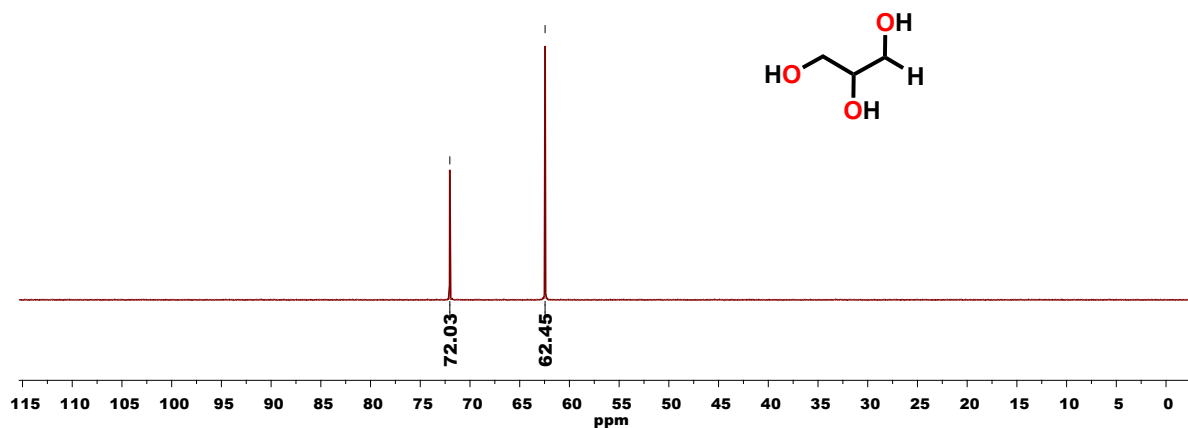

**Figure S68.** <sup>13</sup>C NMR spectrum of product **25** (1,2,3-propanetriol) in D<sub>2</sub>O solvent.

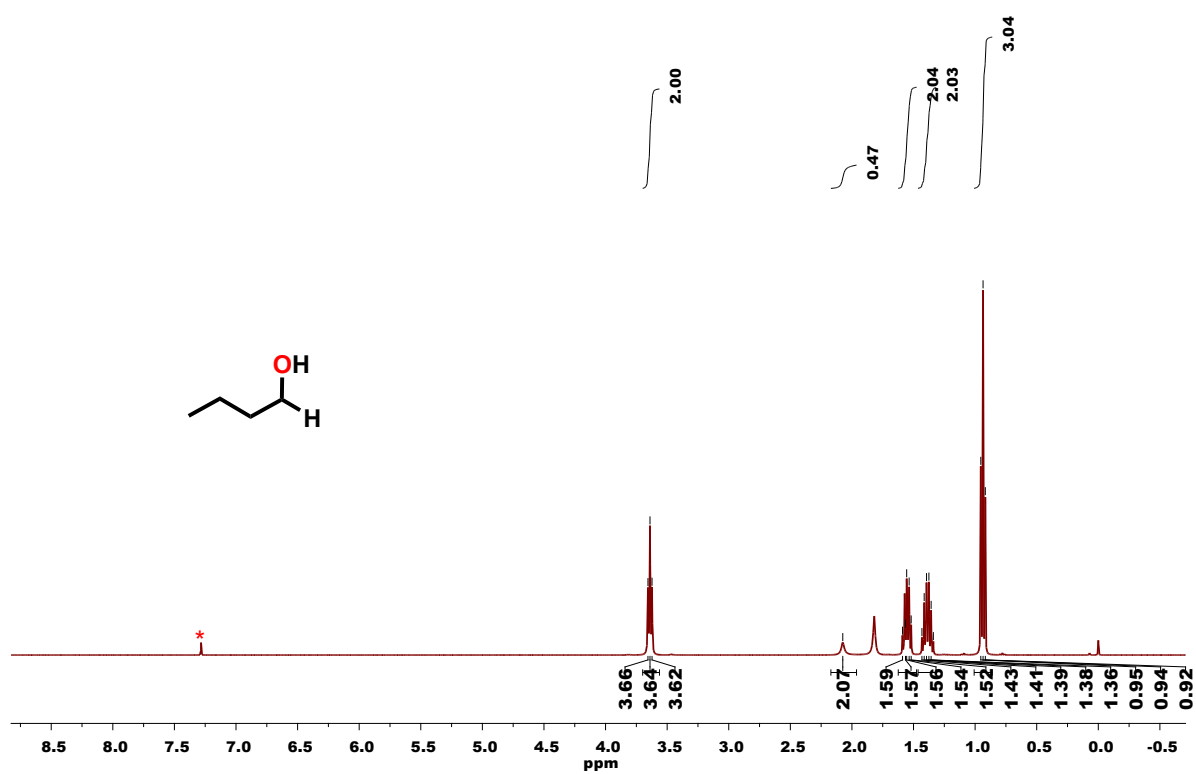

**Figure S69.** <sup>1</sup>H NMR spectrum of product **26** (1-butanol) in CDCl<sub>3</sub> solvent where \* represents the residual solvent peak.

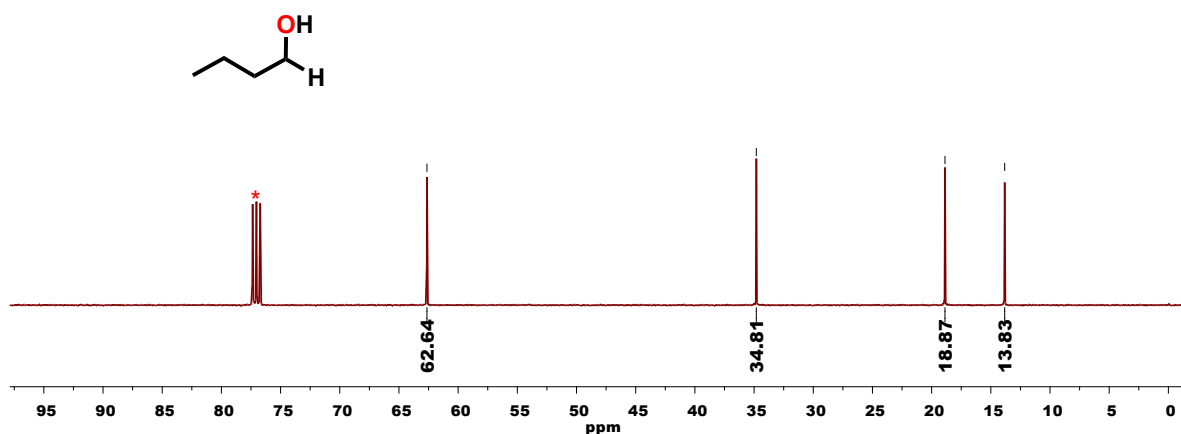

**Figure S70.** <sup>13</sup>C NMR spectrum of product **26** (1-butanol) in CDCl<sub>3</sub> solvent where \* represents the residual solvent peak.

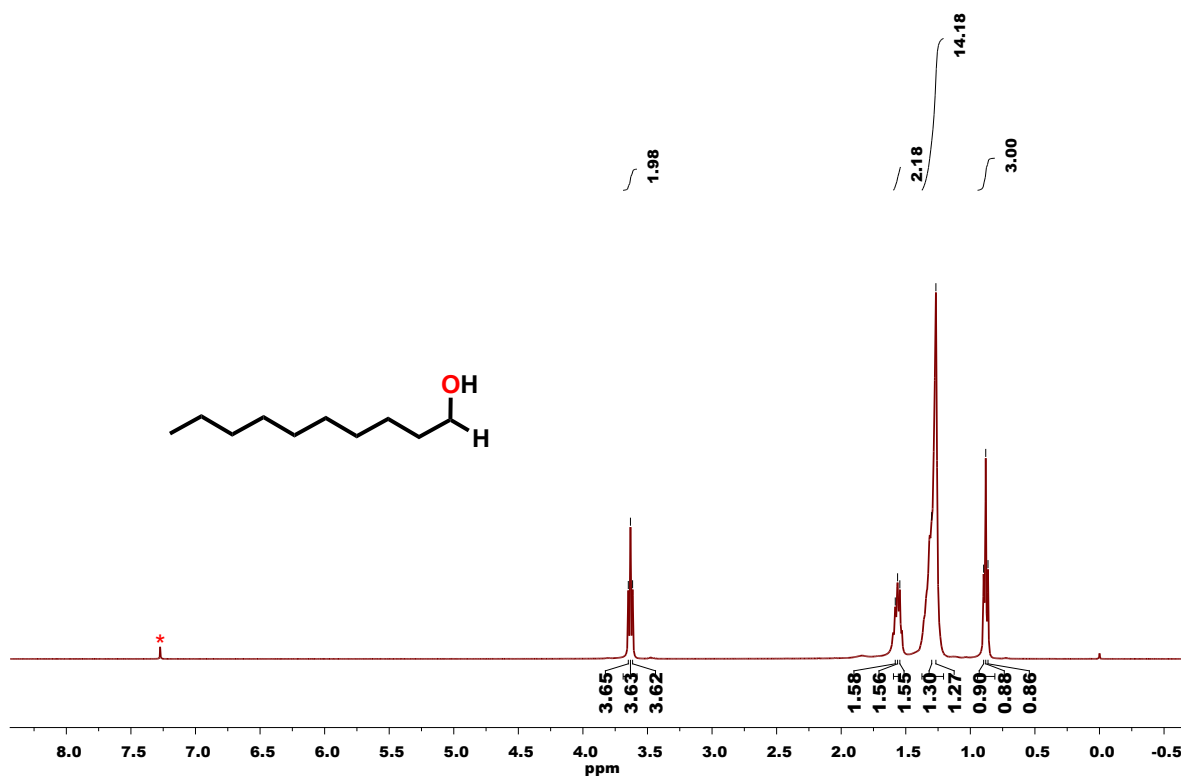

**Figure S71.** <sup>1</sup>H NMR spectrum of product **27** (1-decanol) in CDCl<sub>3</sub> solvent where \* represents the residual solvent peak.

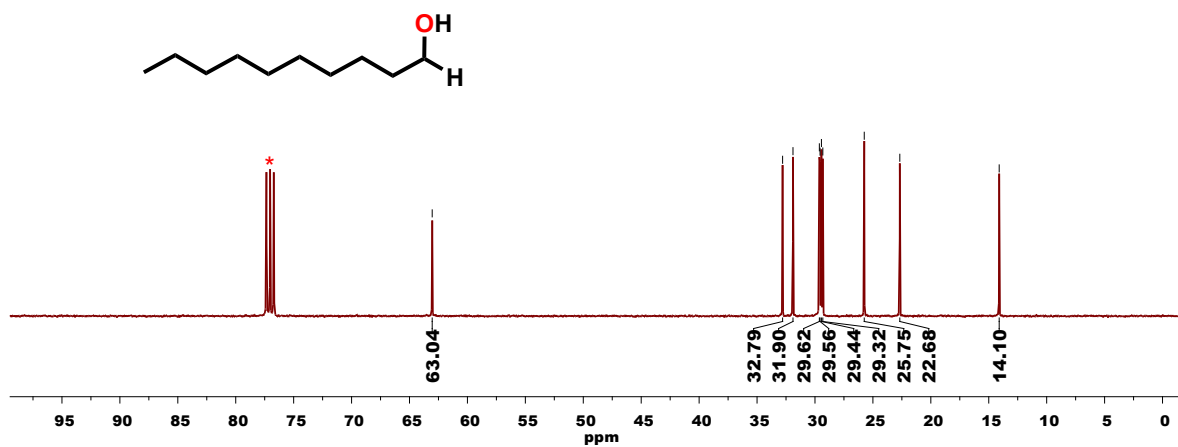

**Figure S72.** <sup>13</sup>C NMR spectrum of product **27** (1-decanol) in CDCl<sub>3</sub> solvent where \* represents the residual solvent peak.

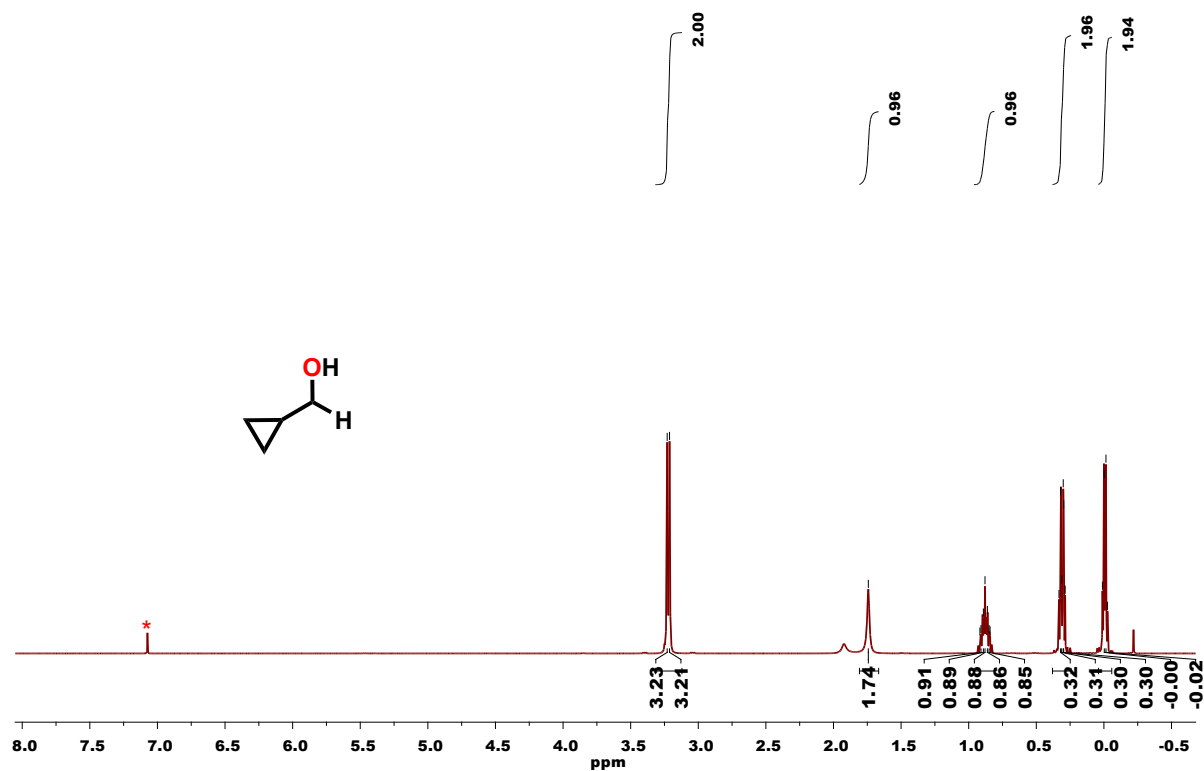

**Figure S73.** <sup>1</sup>H NMR spectrum of product **28** (cyclopropylmethanol) in CDCl<sub>3</sub> solvent where \* represents the residual solvent peak.

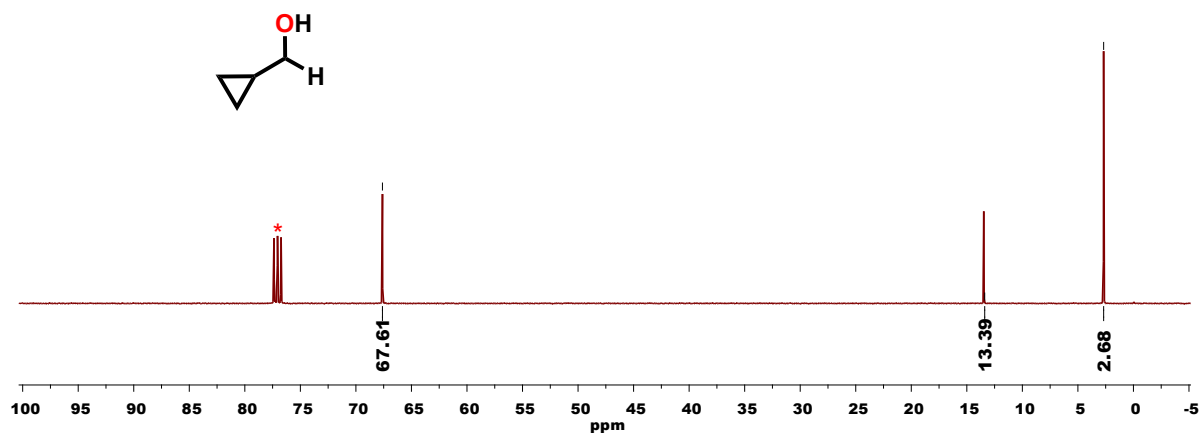

**Figure S74.** <sup>13</sup>C NMR spectrum of product **28** (cyclopropylmethanol) in CDCl<sub>3</sub> solvent where \* represents the residual solvent peak.

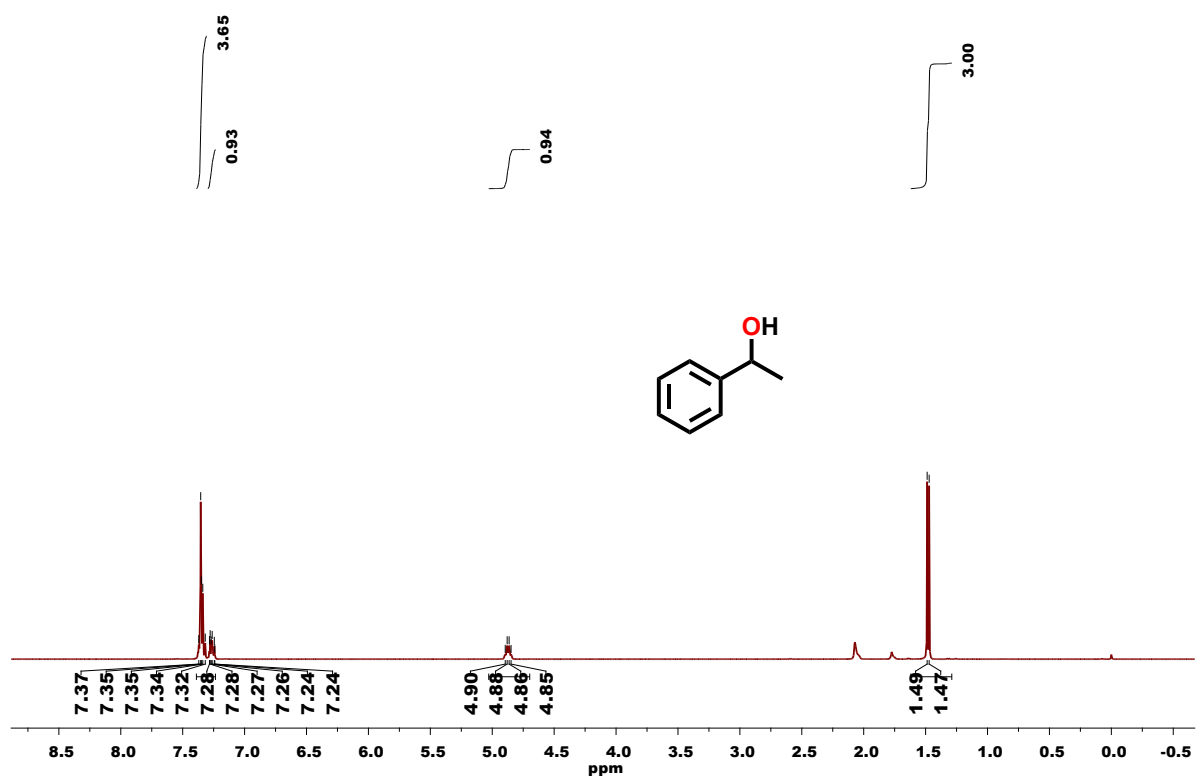

**Figure S75.** <sup>1</sup>H NMR spectrum of product **29** (1-phenylethanol) in CDCl<sub>3</sub> solvent where \* represents the residual solvent peak.

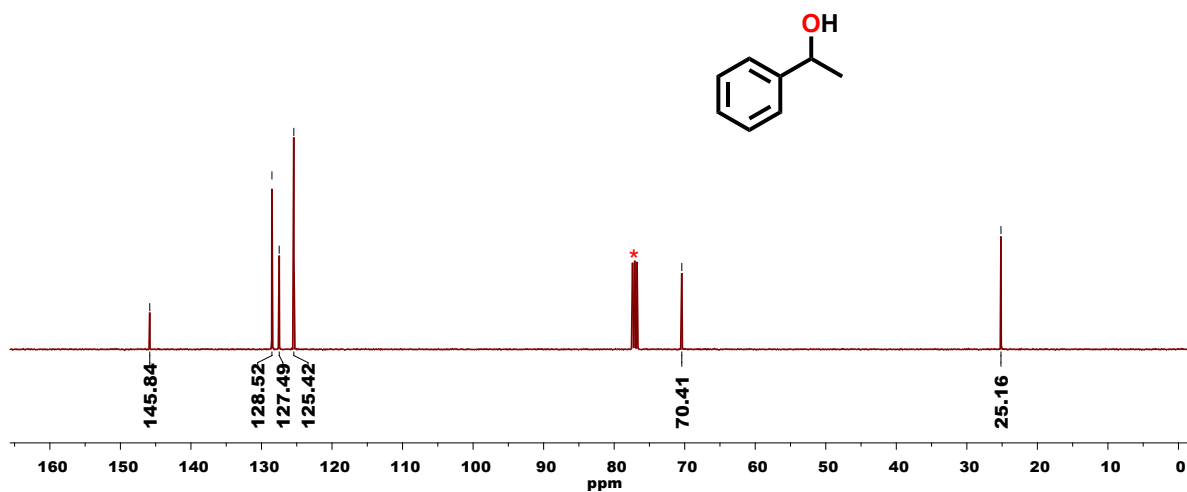

**Figure S76.**  $^{13}\text{C}$  NMR spectrum of product **29** (1-phenylethanol) in  $\text{CDCl}_3$  solvent where \* represents the residual solvent peak.

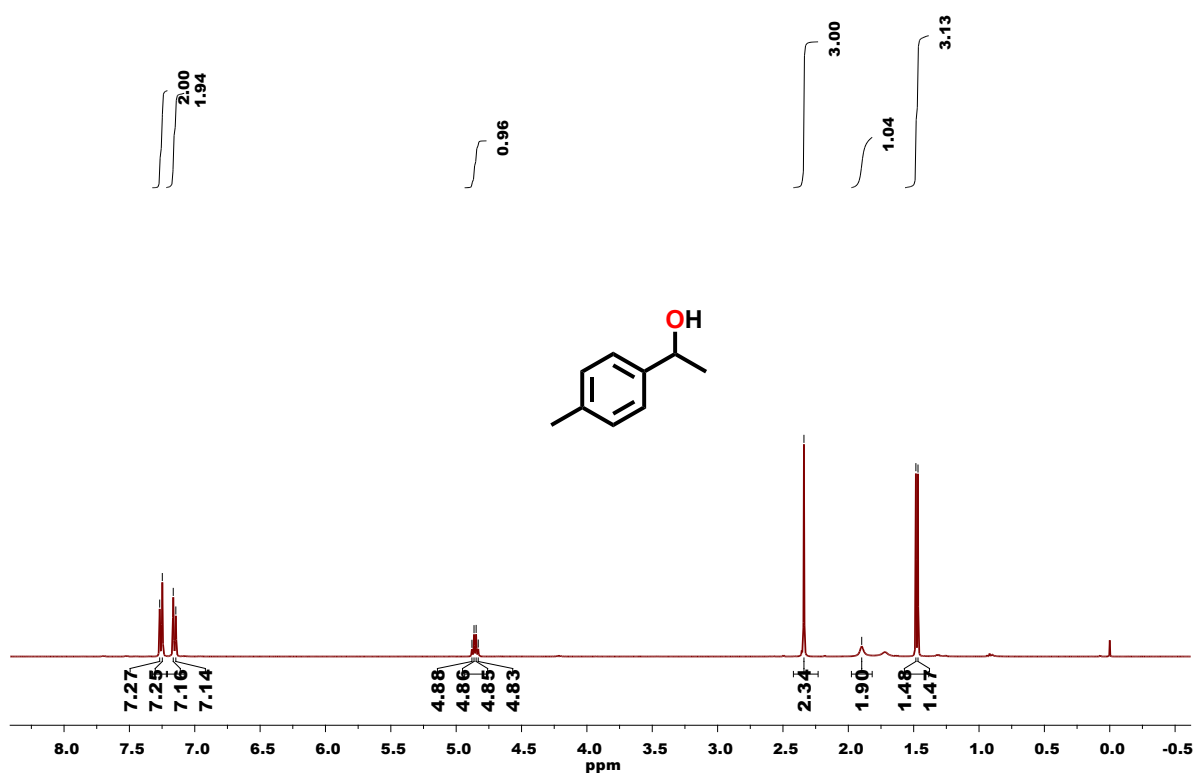

**Figure S77.**  $^1\text{H}$  NMR spectrum of product **30** (1-(4-methylphenyl)ethanol) in  $\text{CDCl}_3$  solvent where \* represents the residual solvent peak.



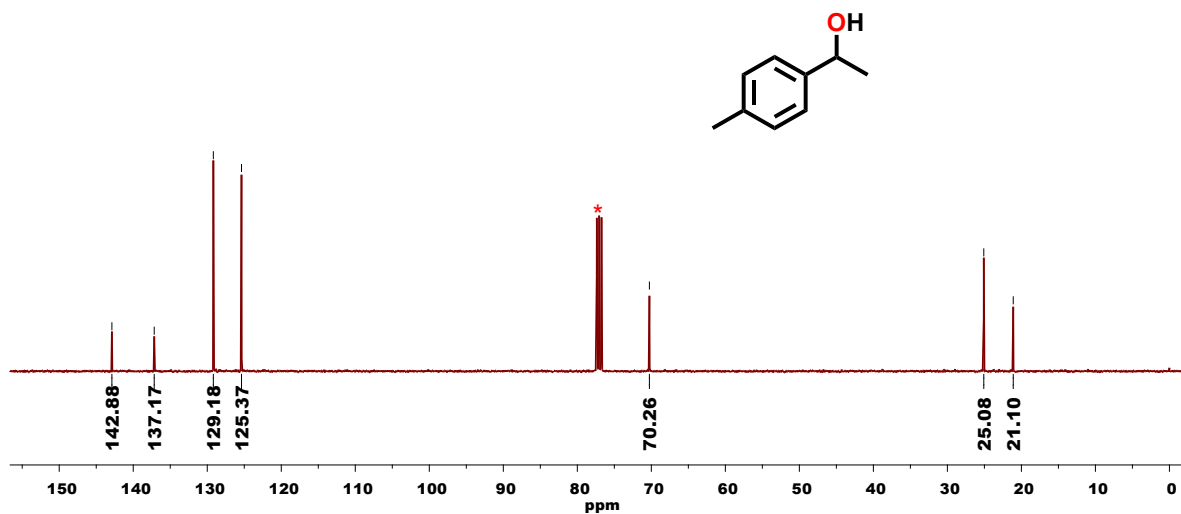

**Figure S78.**  $^{13}\text{C}$  NMR spectrum of product **30** (1-(4-methylphenyl)ethanol) in  $\text{CDCl}_3$  solvent where \* represents the residual solvent peak.

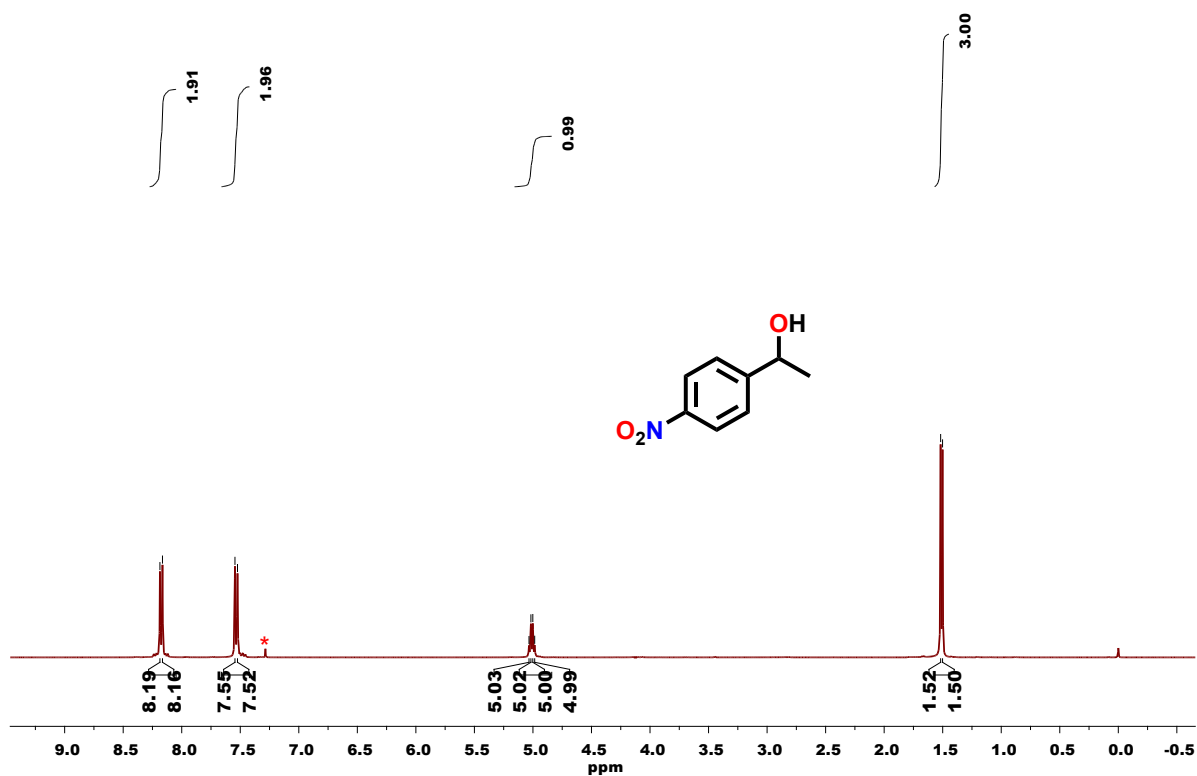

**Figure S79.**  $^1\text{H}$  NMR spectrum of product **31** (1-(4-nitrophenyl)ethanol) in  $\text{CDCl}_3$  solvent where \* represents the residual solvent peak.

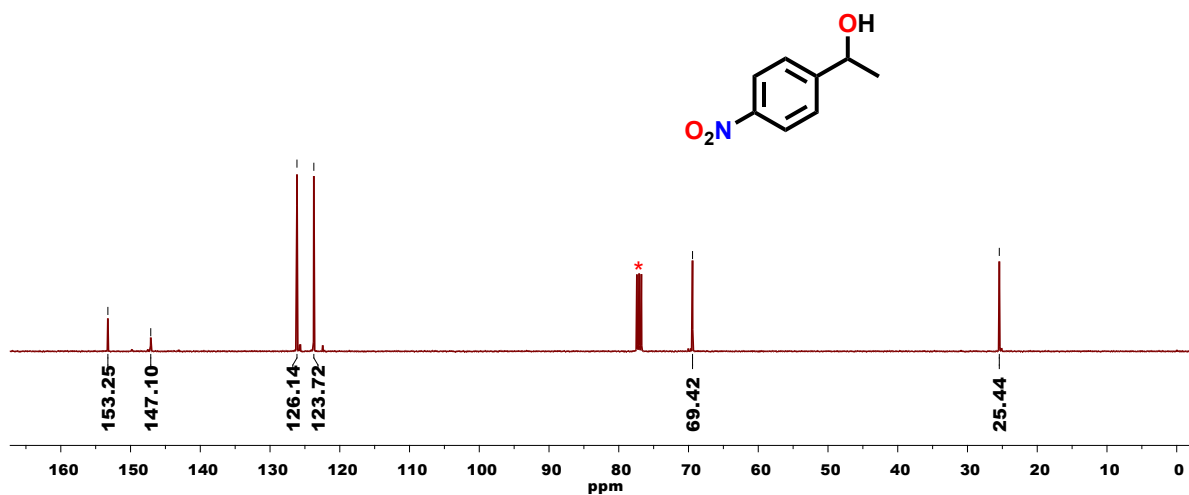

**Figure S80.**  $^{13}\text{C}$  NMR spectrum of product **31** (1-(4-nitrophenyl)ethanol) in  $\text{CDCl}_3$  solvent where \* represents the residual solvent peak.

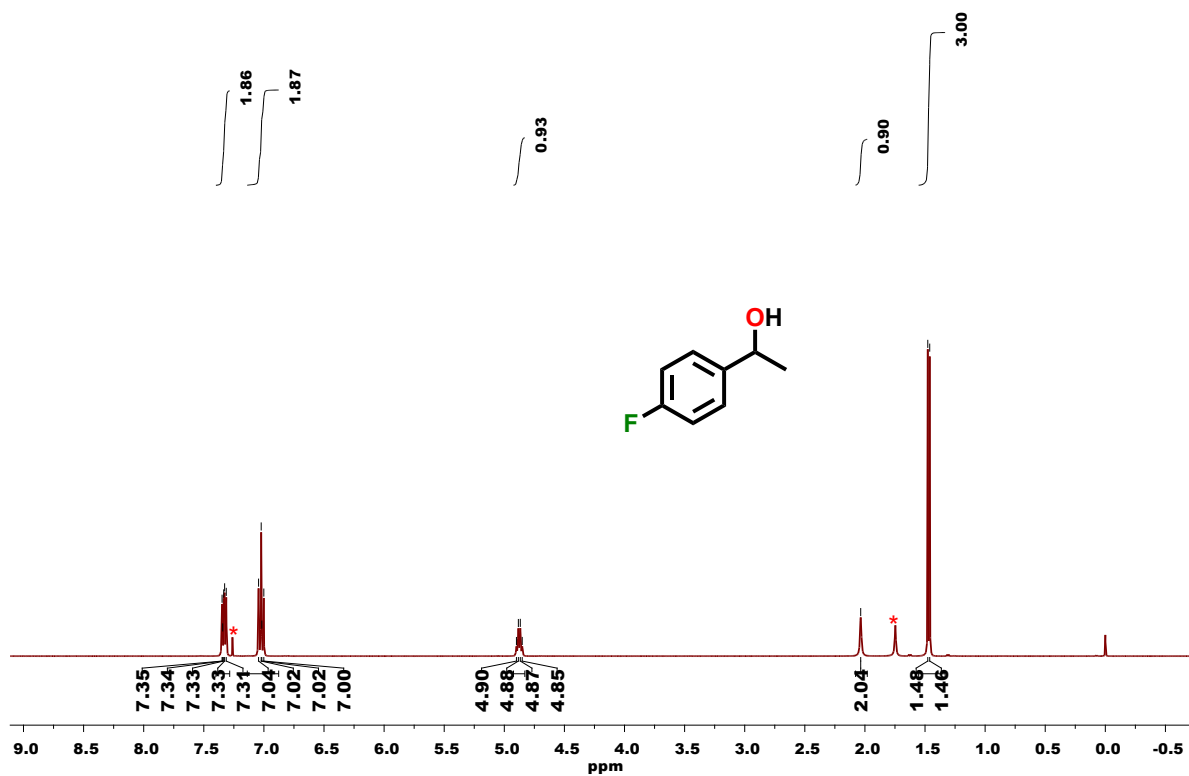

**Figure S81.**  $^1\text{H}$  NMR spectrum of product **32** (1-(4-fluorophenyl)ethanol) in  $\text{CDCl}_3$  solvent where \* represents the residual solvent peak.

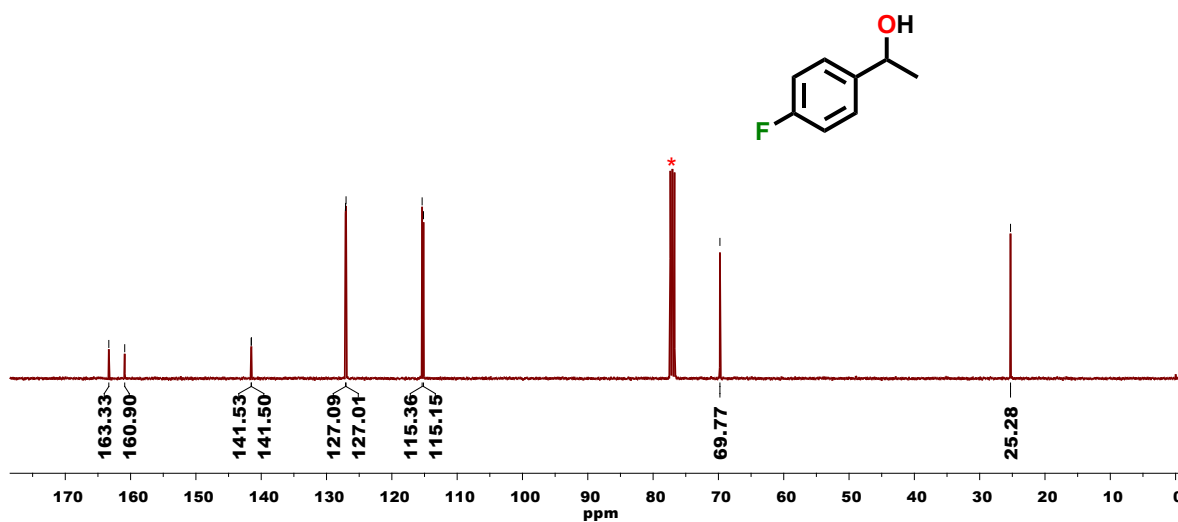

**Figure S82.**  $^{13}\text{C}$  NMR spectrum of product **32** (1-(4-fluorophenyl)ethanol) in  $\text{CDCl}_3$  solvent where \* represents the residual solvent peak.

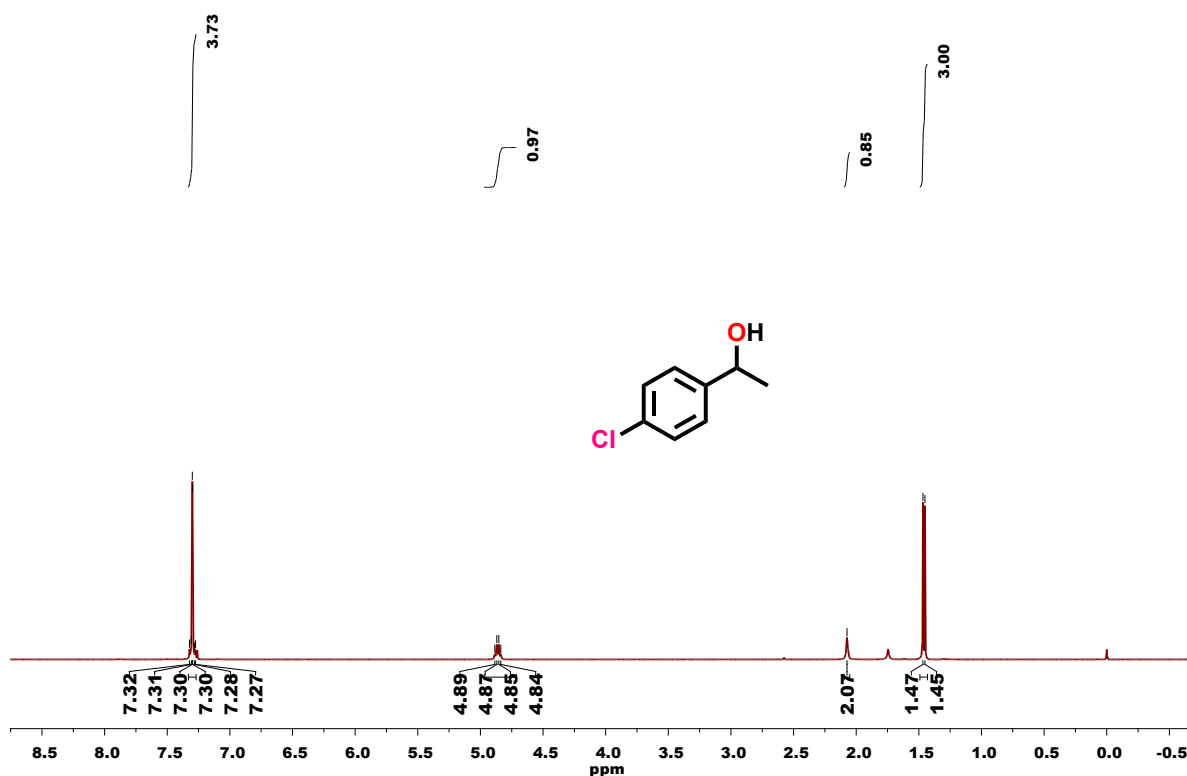

**Figure S83.**  $^1\text{H}$  NMR spectrum of product **33** (1-(4-chlorophenyl)ethanol) in  $\text{CDCl}_3$  solvent where \* represents the residual solvent peak.

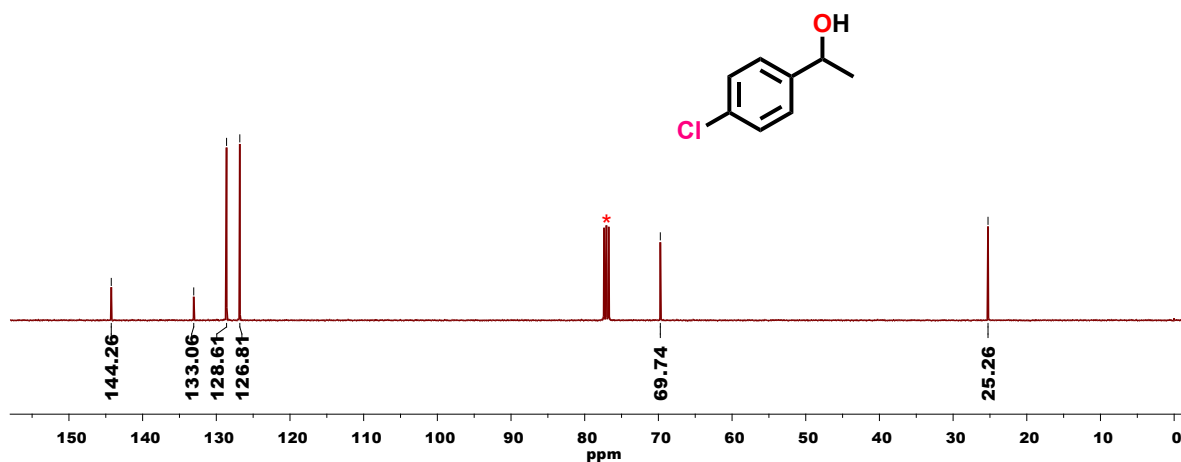

**Figure S84.**  $^{13}\text{C}$  NMR spectrum of product **33** (1-(4-chlorophenyl)ethanol) in  $\text{CDCl}_3$  solvent where \* represents the residual solvent peak.

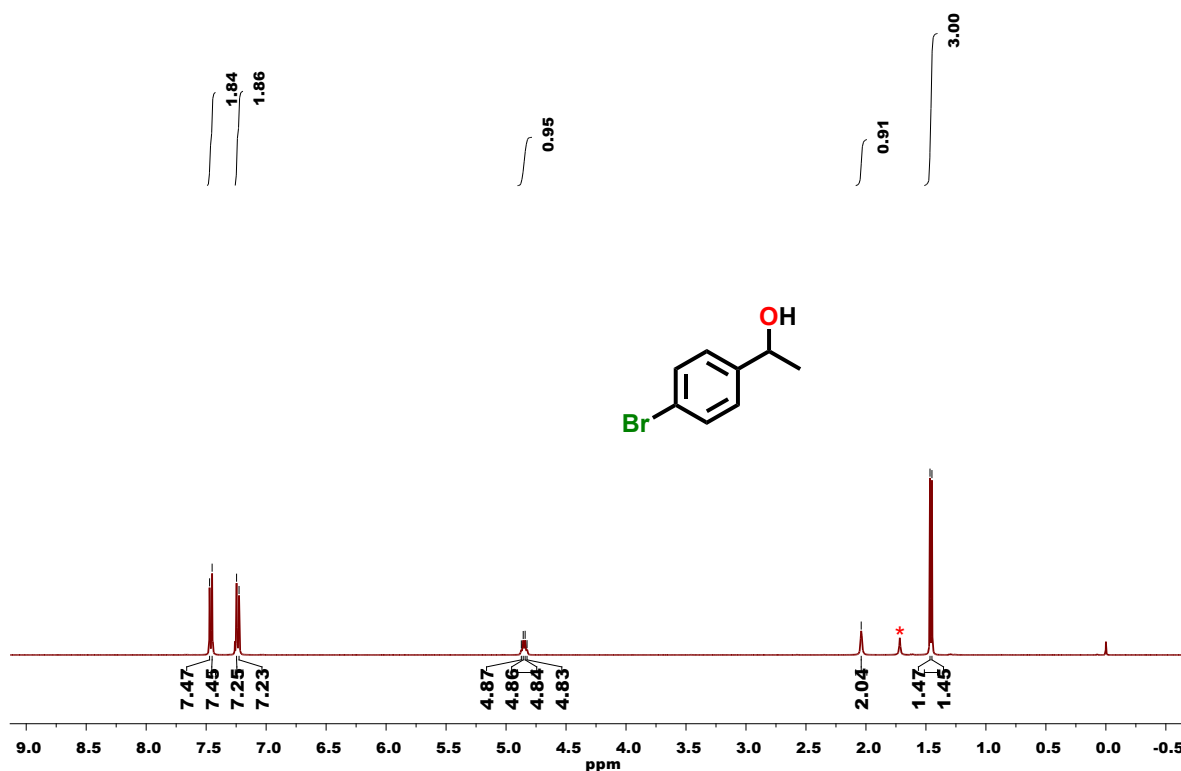

**Figure S85.**  $^1\text{H}$  NMR spectrum of product **34** (1-(4-bromophenyl)ethanol) in  $\text{CDCl}_3$  solvent where \* represents the residual solvent peak.

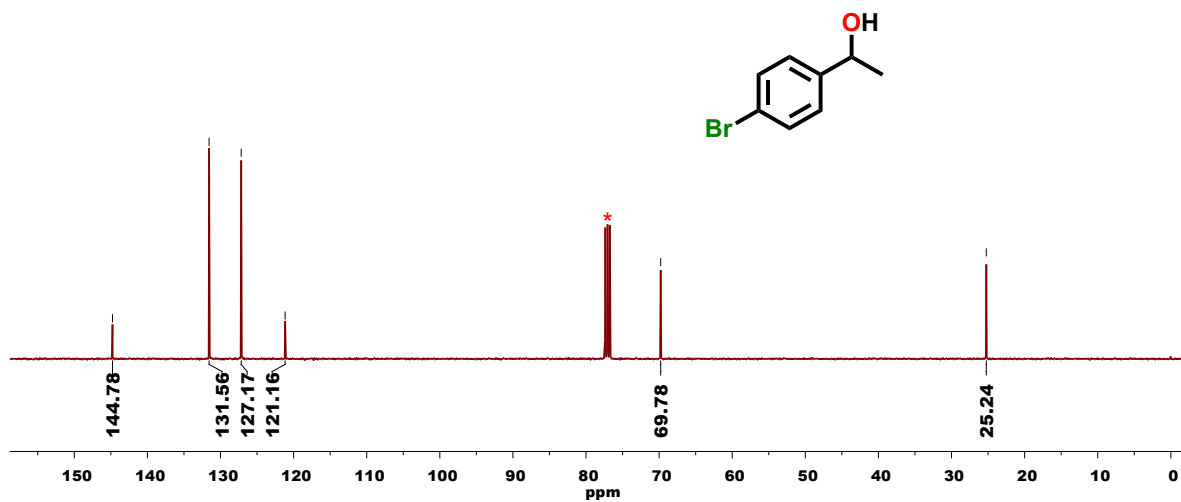

**Figure S86.**  $^{13}\text{C}$  NMR spectrum of product **34** (1-(4-bromophenyl)ethanol) in  $\text{CDCl}_3$  solvent where \* represents the residual solvent peak.

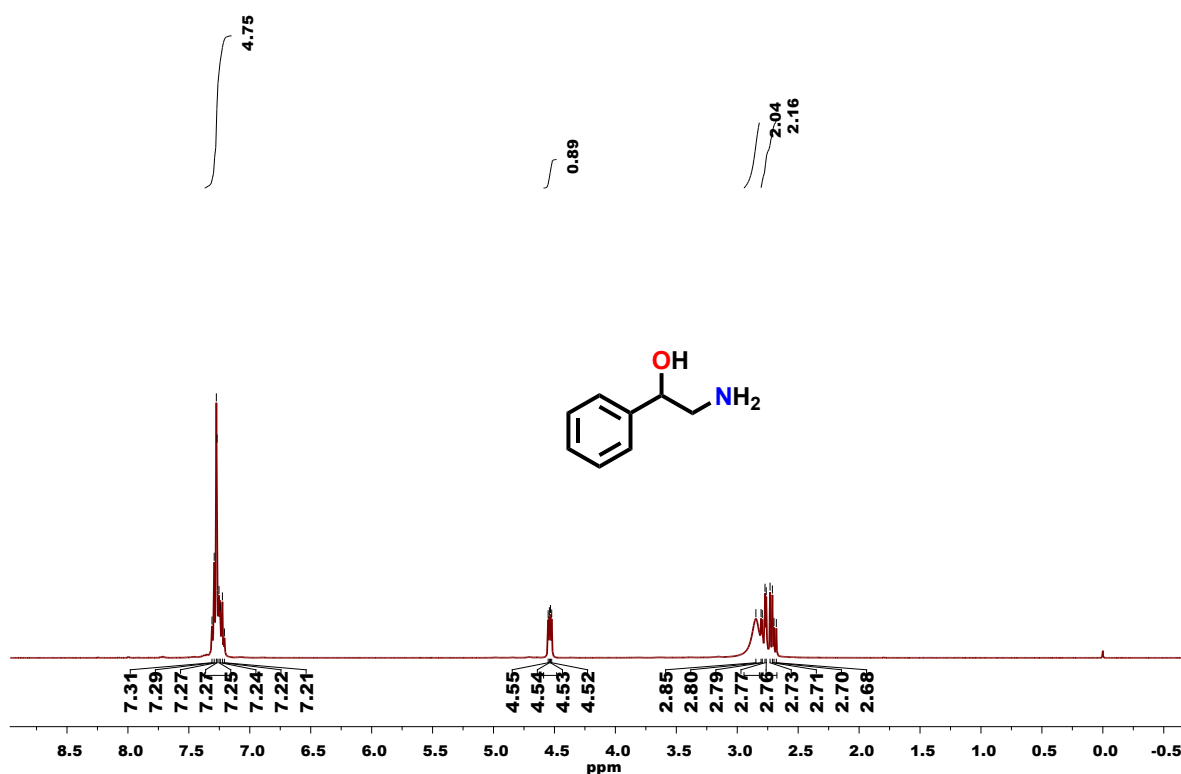

**Figure S87.**  $^1\text{H}$  NMR spectrum of product **35** (2-amino-1-phenylethanol) in  $\text{CDCl}_3$  solvent where \* represents the residual solvent peak.

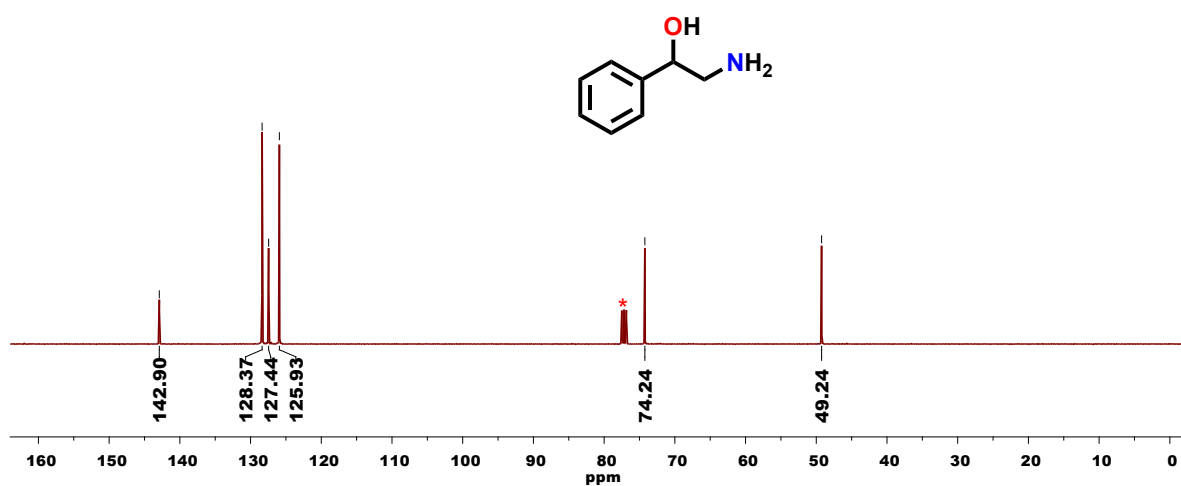

**Figure S88.** <sup>13</sup>C NMR spectrum of product **35** (2-amino-1-phenylethanol) in CDCl<sub>3</sub> solvent where \* represents the residual solvent peak.

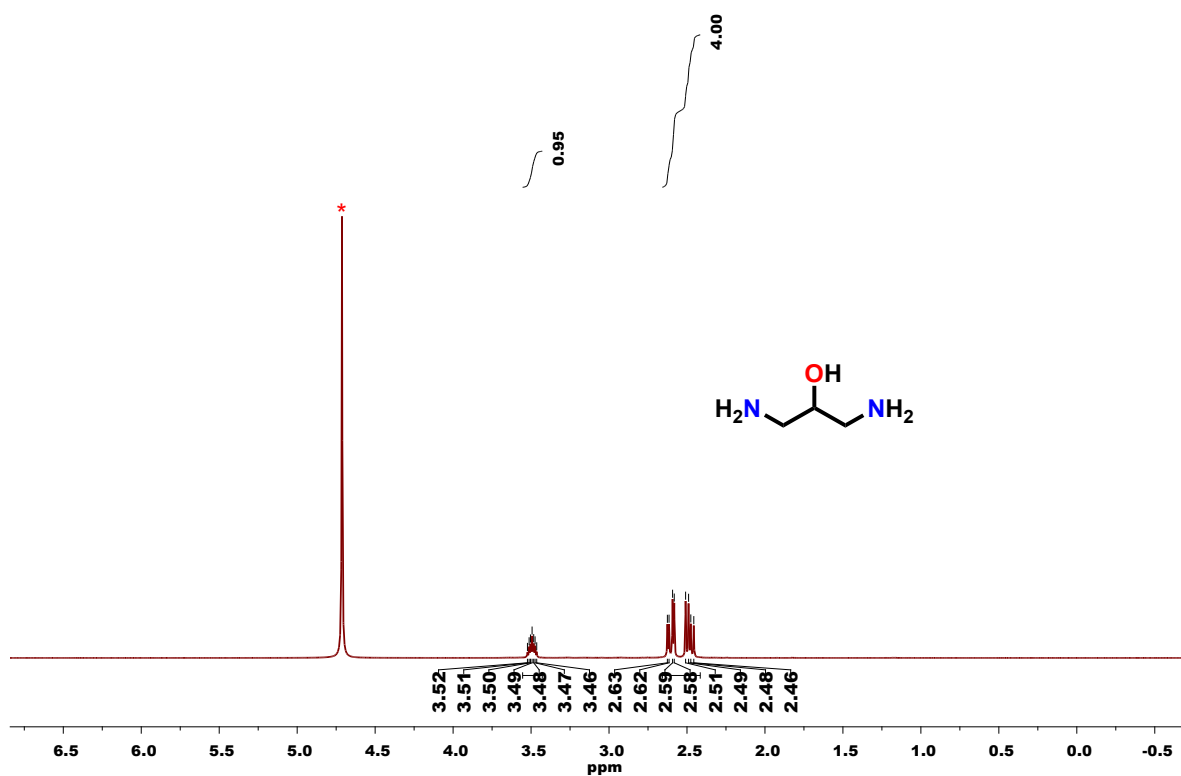

**Figure S89.** <sup>1</sup>H NMR spectrum of product **36** (1,3-diaminopropanol) in D<sub>2</sub>O solvent where \* represents the residual solvent peak.

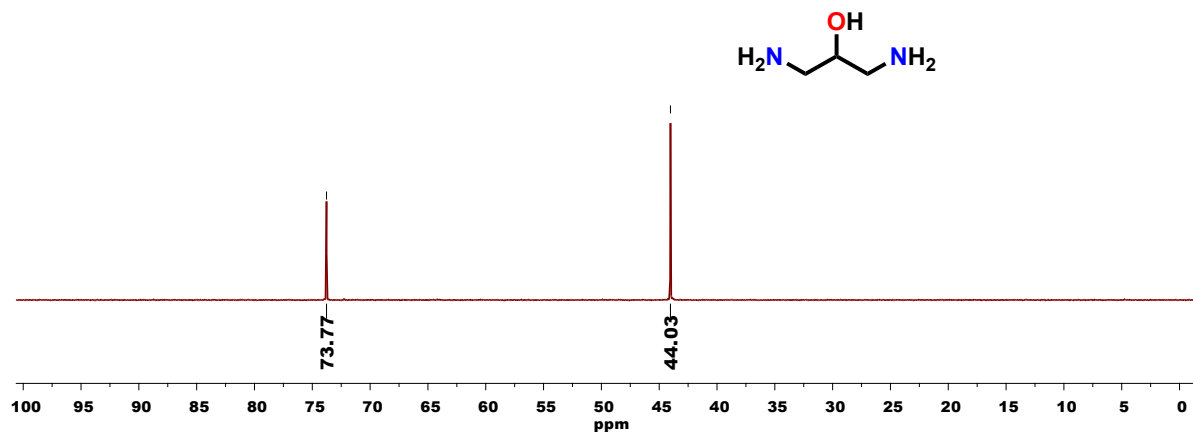

**Figure S90.** <sup>13</sup>C NMR spectrum of product **36** (1,3-diaminopropanol) in D<sub>2</sub>O solvent.

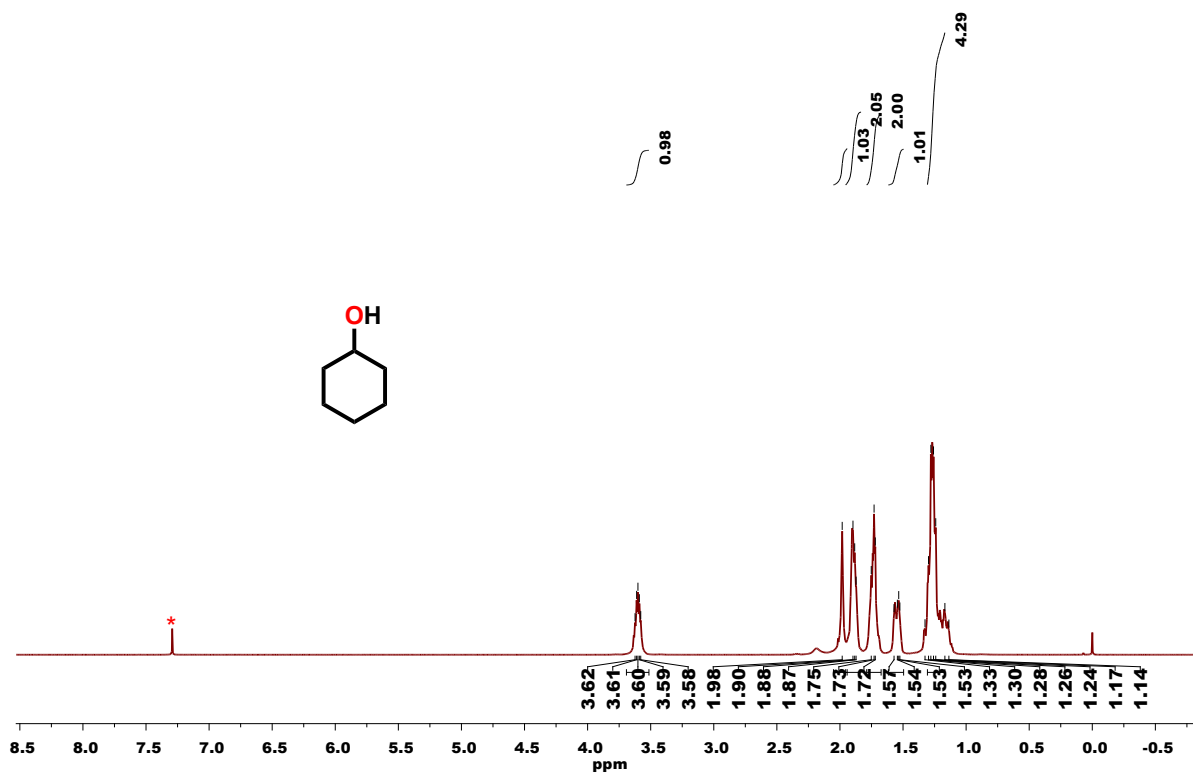

**Figure S91.** <sup>1</sup>H NMR spectrum of product **37** (cyclohexanol) in CDCl<sub>3</sub> solvent where \* represents the residual solvent peak.

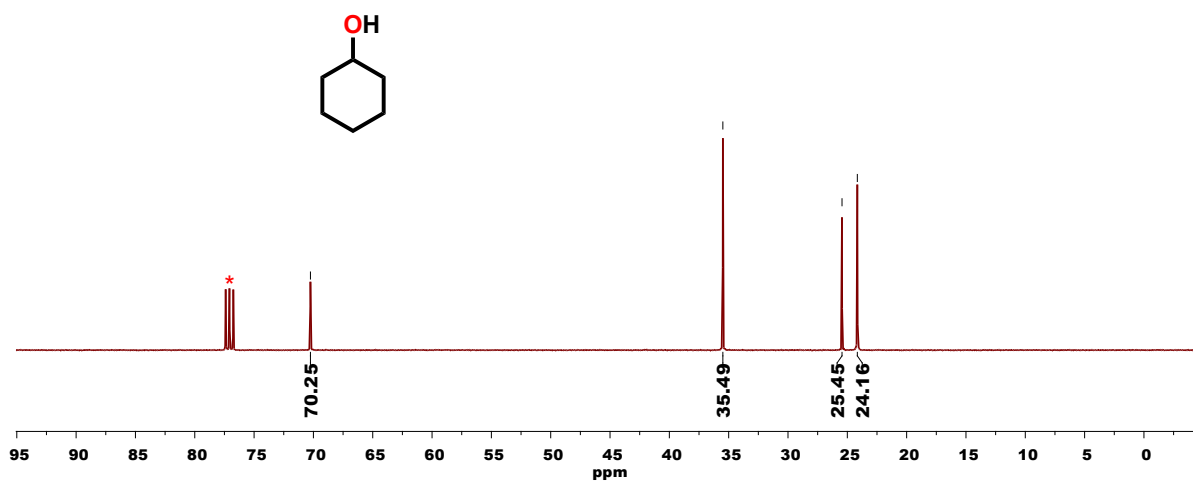

**Figure S92.**  $^{13}\text{C}$  NMR spectrum of product **37** (cyclohexanol) in  $\text{CDCl}_3$  solvent where \* represents the residual solvent peak.

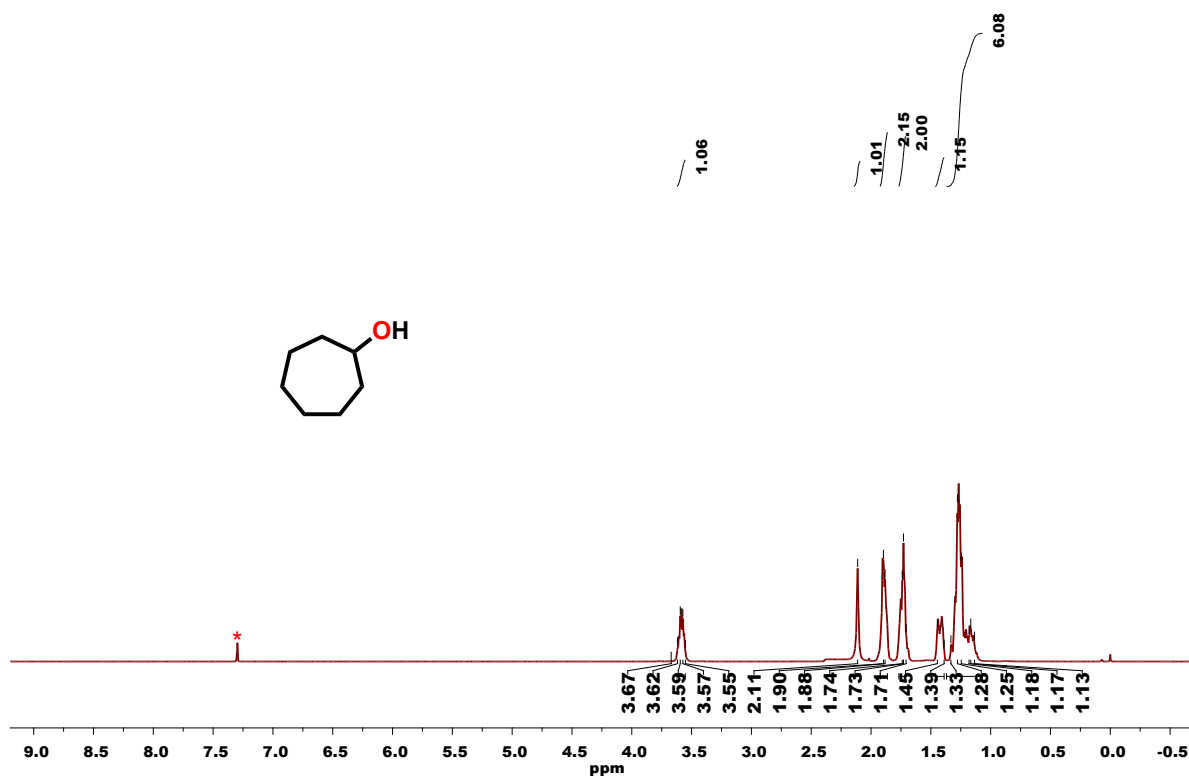

**Figure S93.**  $^1\text{H}$  NMR spectrum of product **38** (cycloheptanol) in  $\text{CDCl}_3$  solvent where \* represents the residual solvent peak.



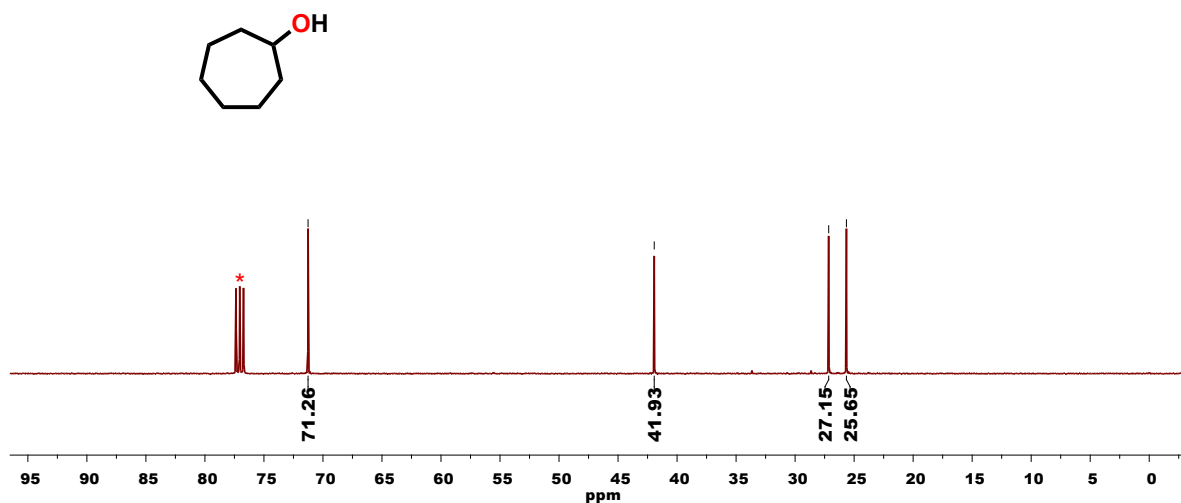

**Figure S94.**  $^{13}\text{C}$  NMR spectrum of product **38** (cycloheptanol) in  $\text{CDCl}_3$  solvent where \* represents the residual solvent peak.

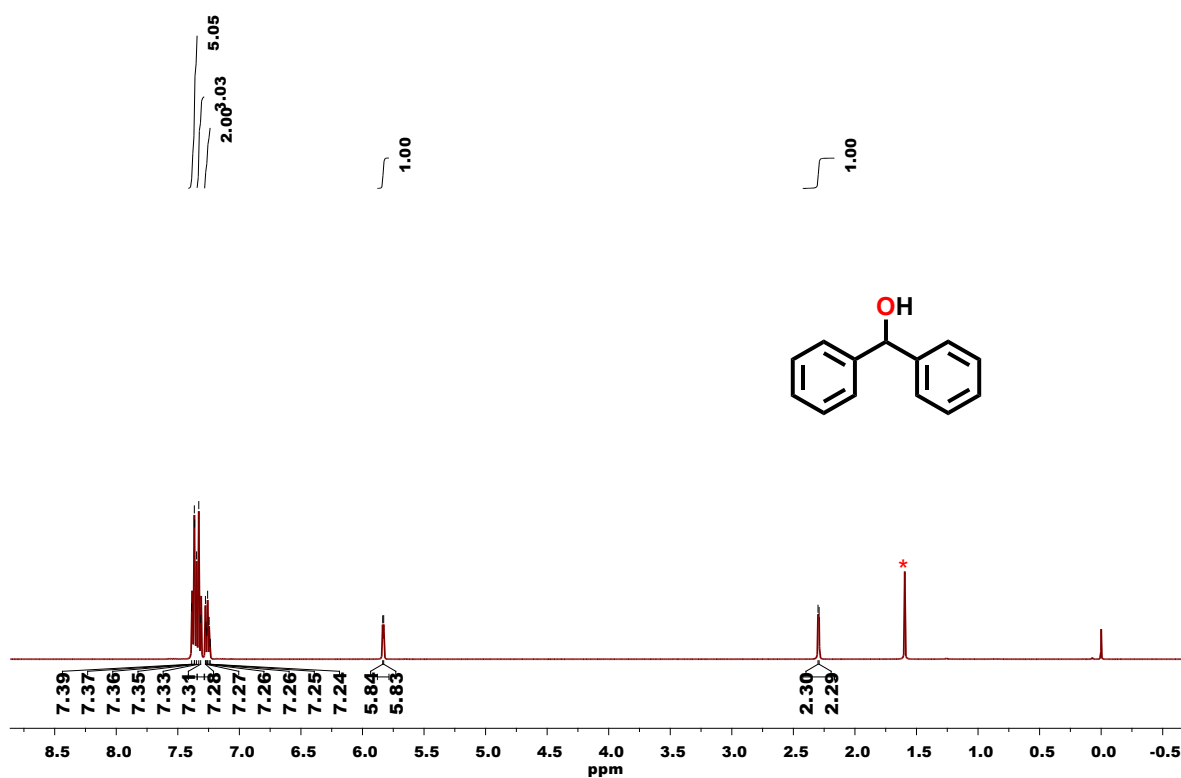

**Figure S95.**  $^1\text{H}$  NMR spectrum of product **39** (diphenylmethanol) in  $\text{CDCl}_3$  solvent where \* represents the residual solvent and/or adventitious water peaks.

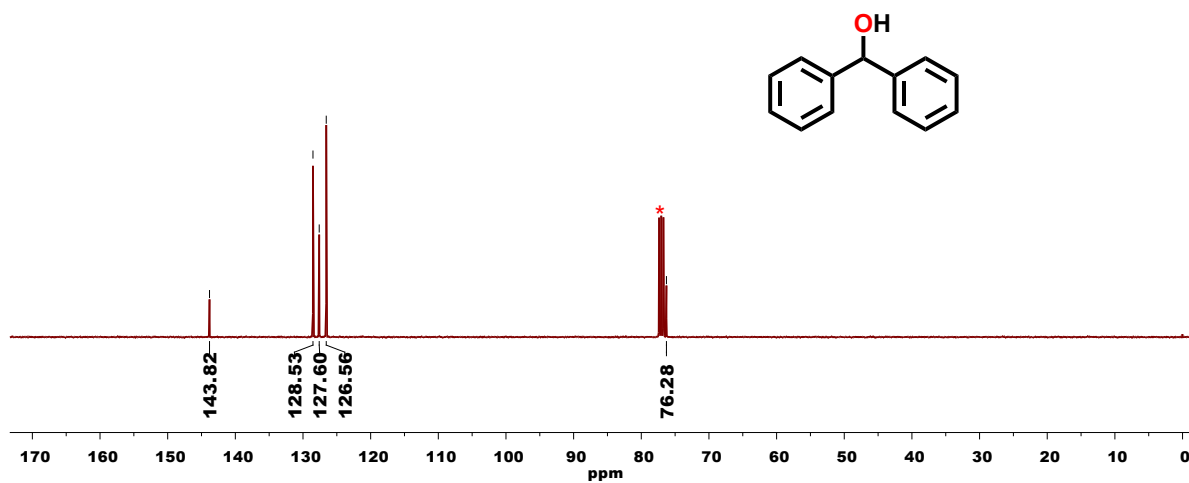

**Figure S96.**  $^{13}\text{C}$  NMR spectrum of product **39** (diphenylmethanol) in  $\text{CDCl}_3$  solvent where \* represents the residual solvent peak.

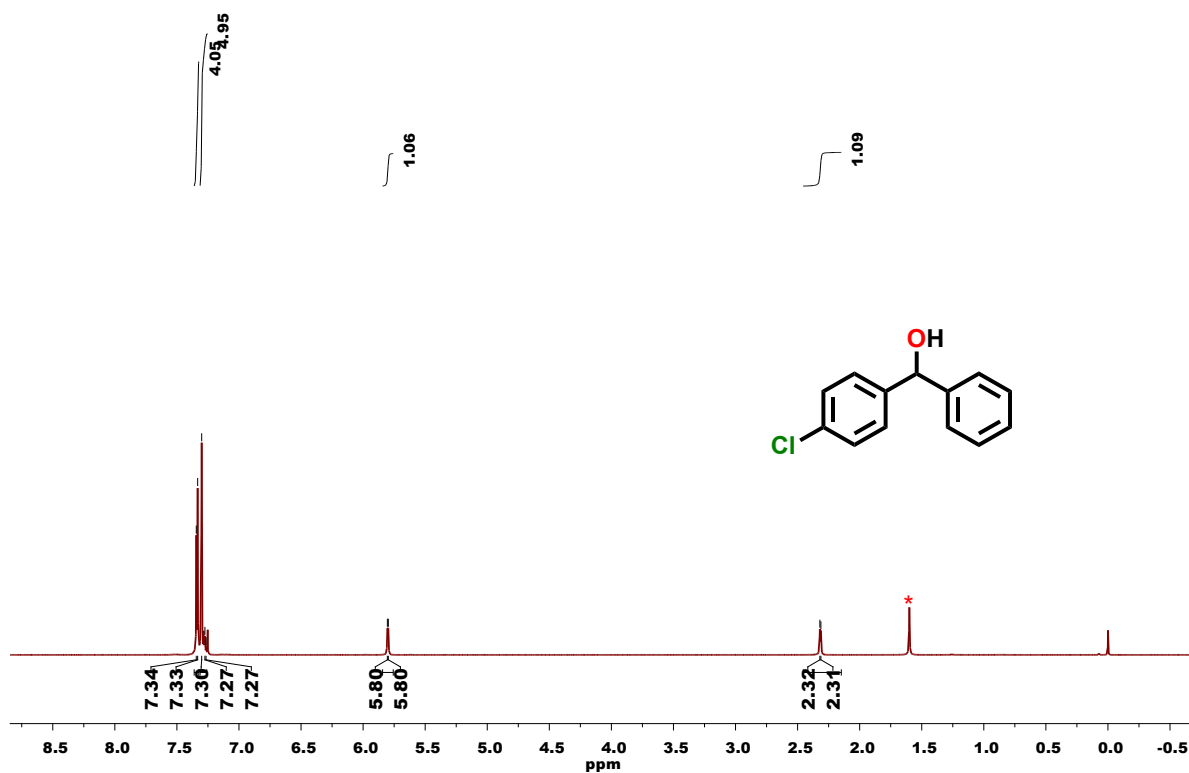

**Figure S97.**  $^1\text{H}$  NMR spectrum of product **40** (4-chlorobenzhydrol) in  $\text{CDCl}_3$  solvent where \* represents the residual solvent and/or adventitious water peaks.

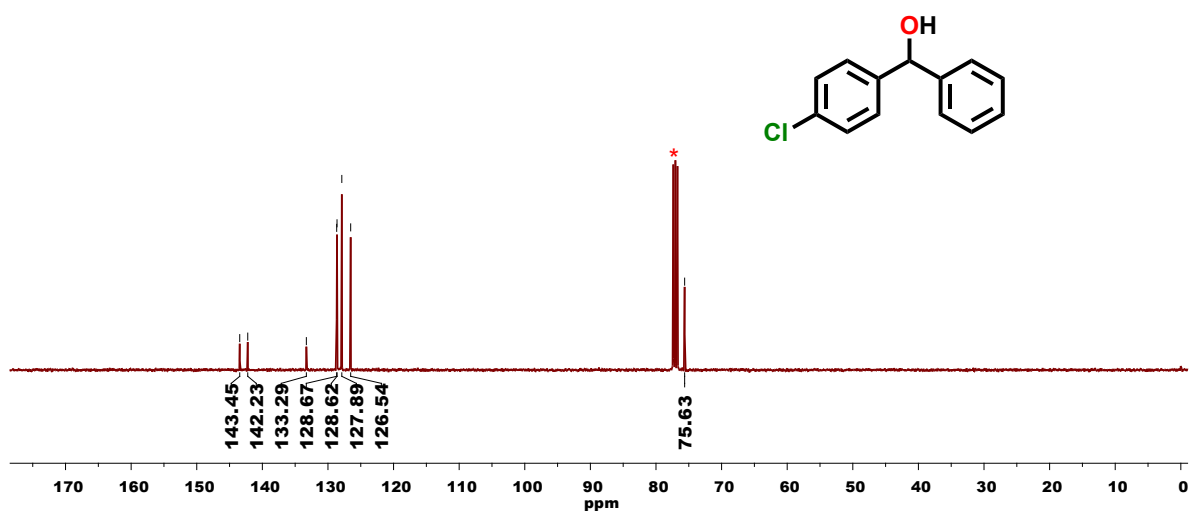

**Figure S98.**  $^{13}\text{C}$  NMR spectrum of product **40** (4-chlorobenzhydrol) in  $\text{CDCl}_3$  solvent where \* represents the residual solvent peak.

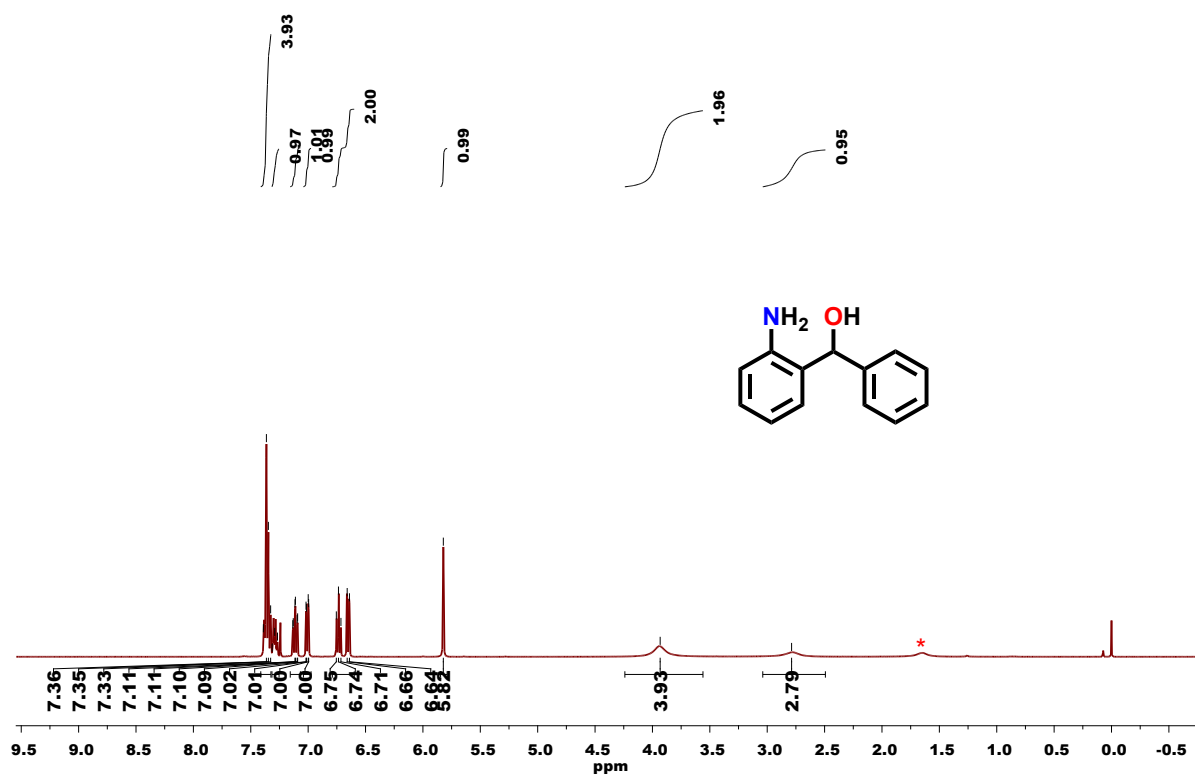

**Figure S99.**  $^1\text{H}$  NMR spectrum of product **41** (2-aminobenzhydrol) in  $\text{CDCl}_3$  solvent where \* represents the residual solvent and/or adventitious water peaks.

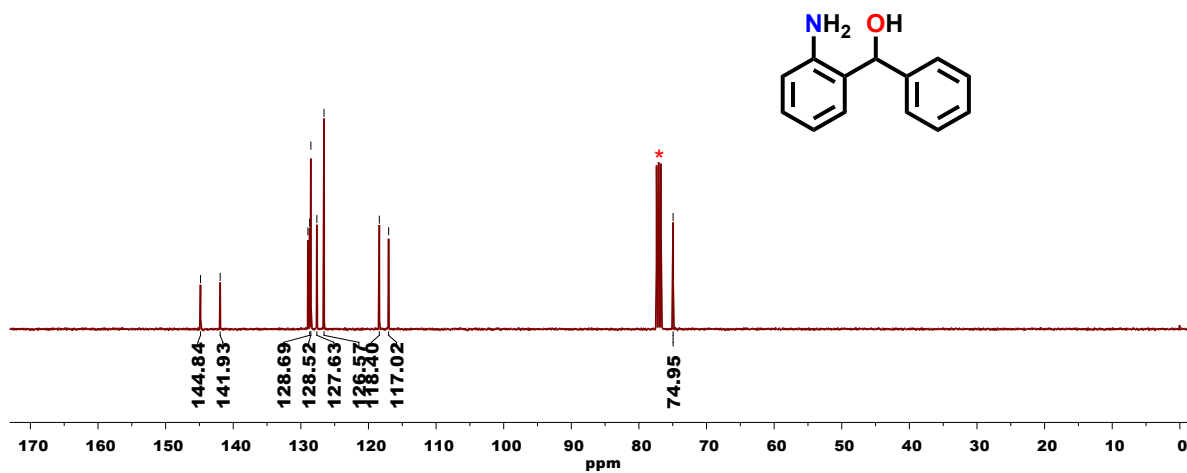

**Figure S100.** <sup>13</sup>C NMR spectrum of product **41** (2-aminobenzhydrol) in CDCl<sub>3</sub> solvent where \* represents the residual solvent peak.

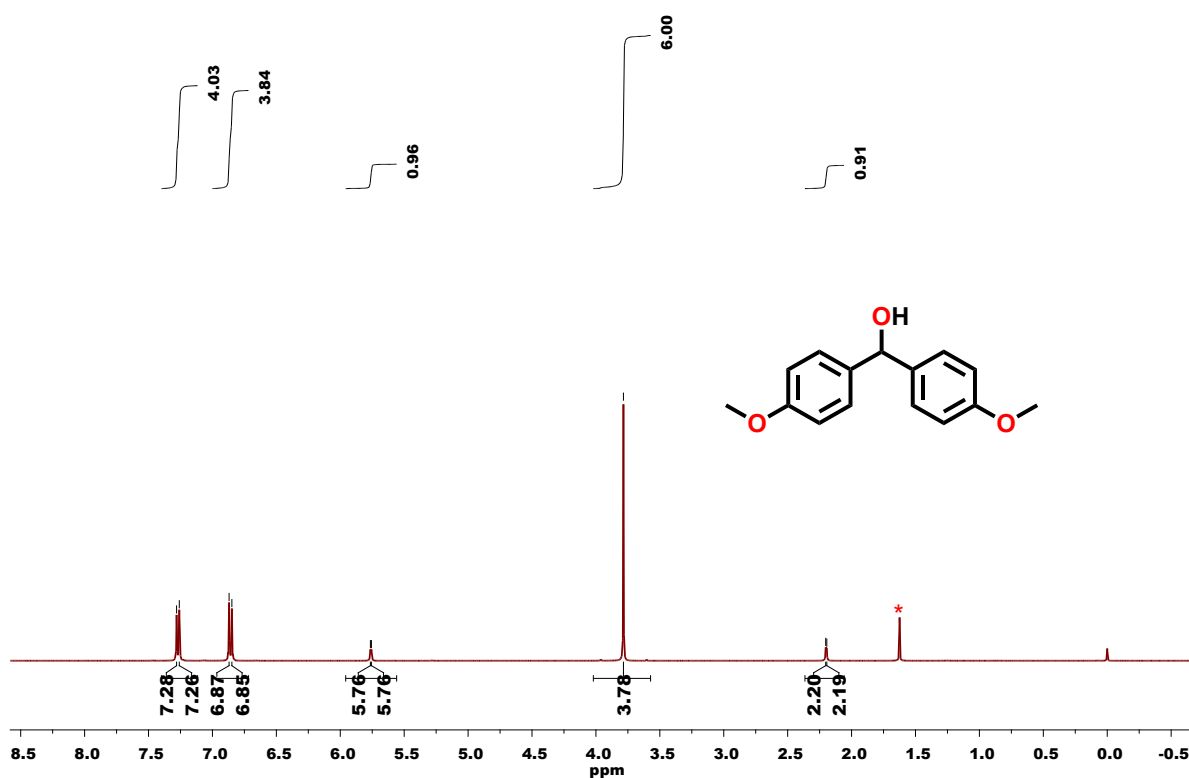

**Figure S101.** <sup>1</sup>H NMR spectrum of product **42** (4,4'-dimethoxybenzhydrol) in CDCl<sub>3</sub> solvent where \* represents the residual solvent and/or adventitious water peaks.

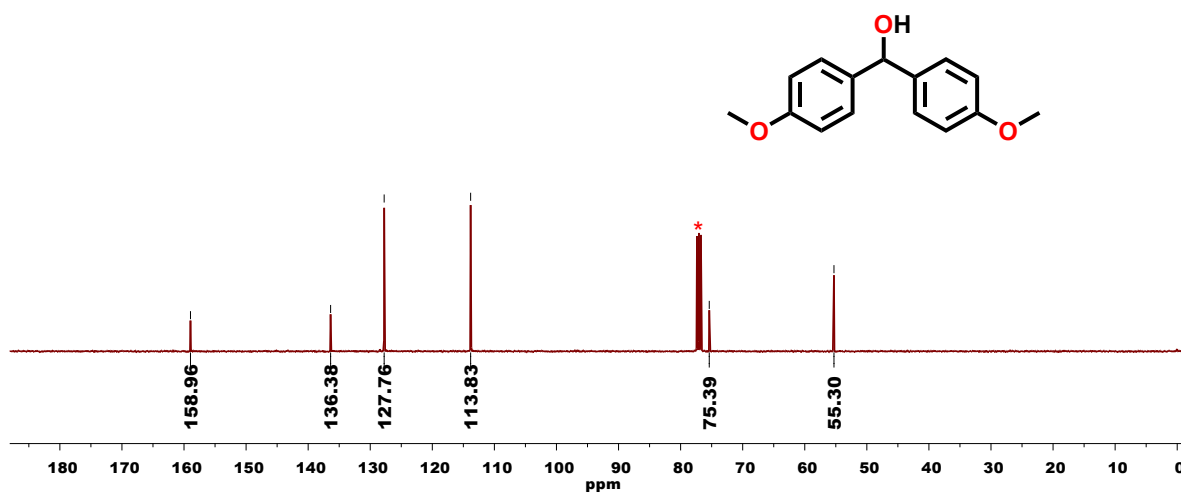

**Figure S102.**  $^{13}\text{C}$  NMR spectrum of product **42** (4,4'-dimethoxybenzhydrol) in  $\text{CDCl}_3$  solvent where \* represents the residual solvent peak.

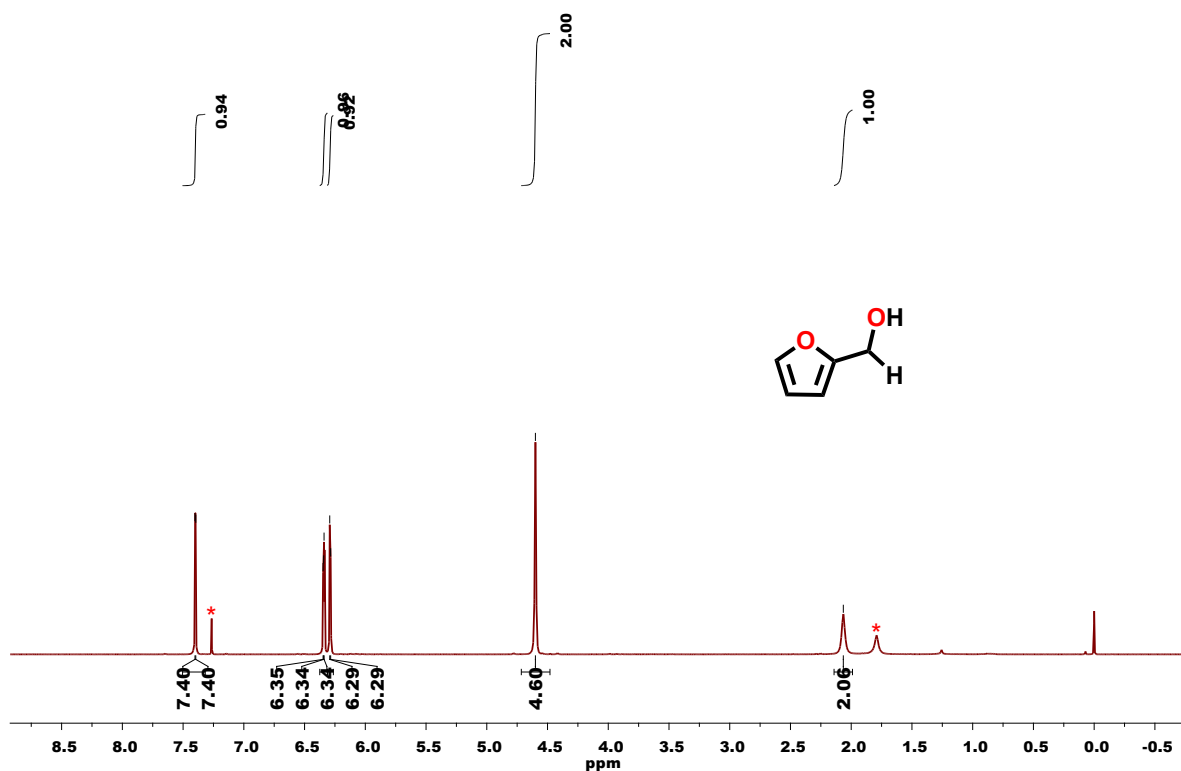

**Figure S103.**  $^1\text{H}$  NMR spectrum of product **43** (furfuryl alcohol) in  $\text{CDCl}_3$  solvent where \* represents the residual solvent peak.

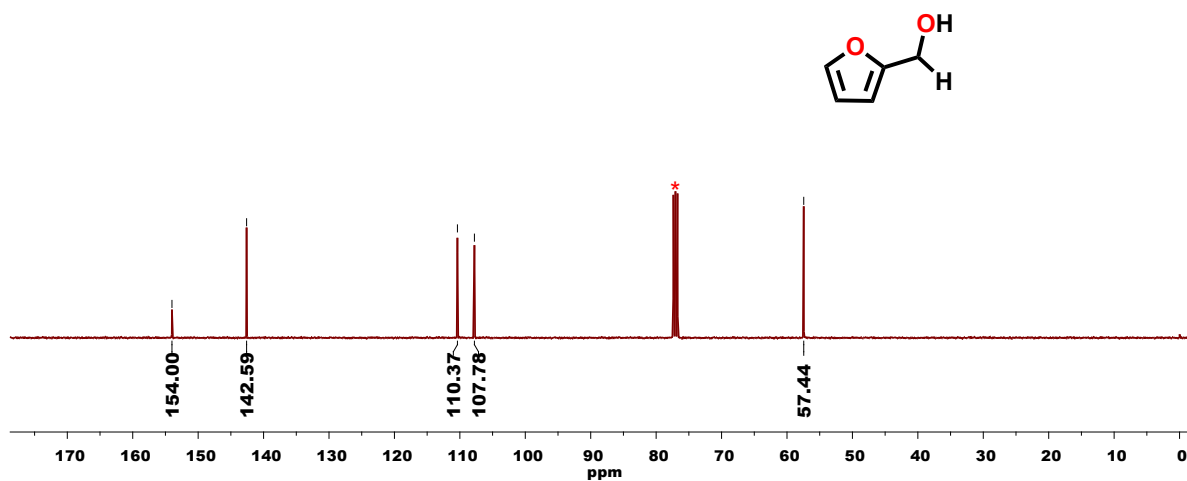

**Figure S104.**  $^{13}\text{C}$  NMR spectrum of product 43 (furfuryl alcohol) in  $\text{CDCl}_3$  solvent where \* represents the residual solvent peak.

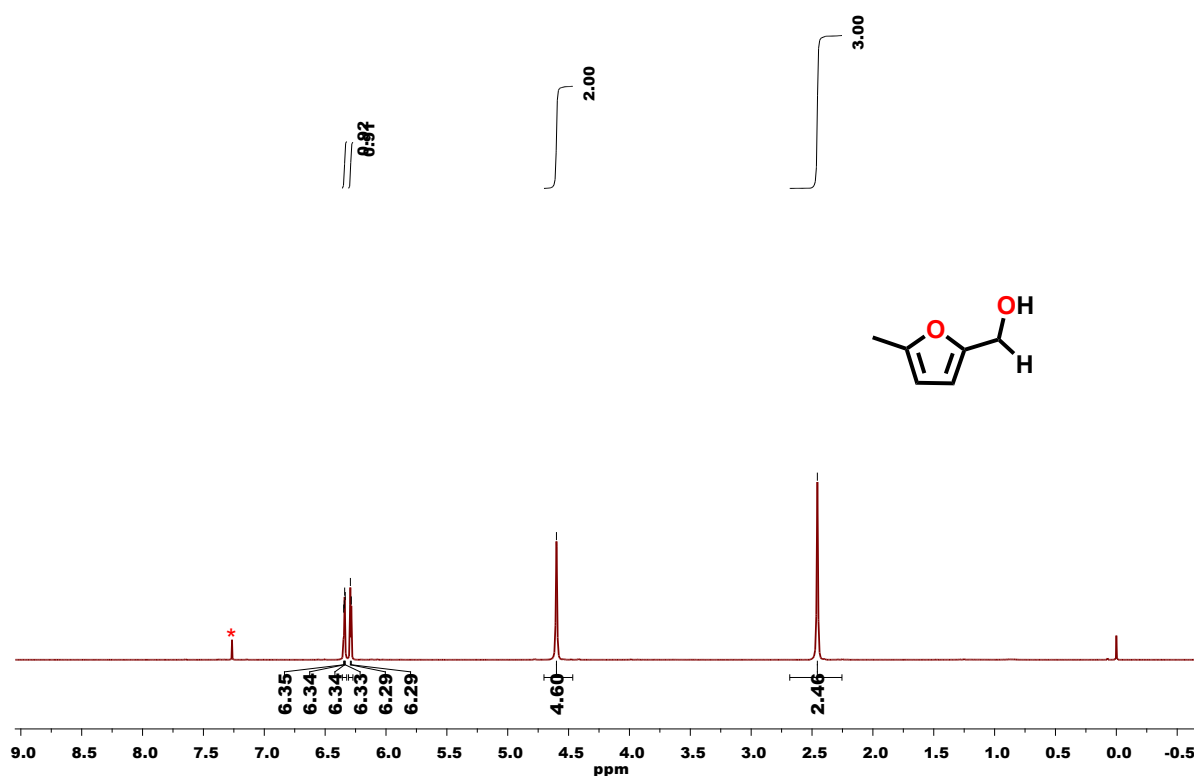

**Figure S105.**  $^1\text{H}$  NMR spectrum of product 44 (5-methylfurfuryl alcohol) in  $\text{CDCl}_3$  solvent where \* represents the residual solvent peak.

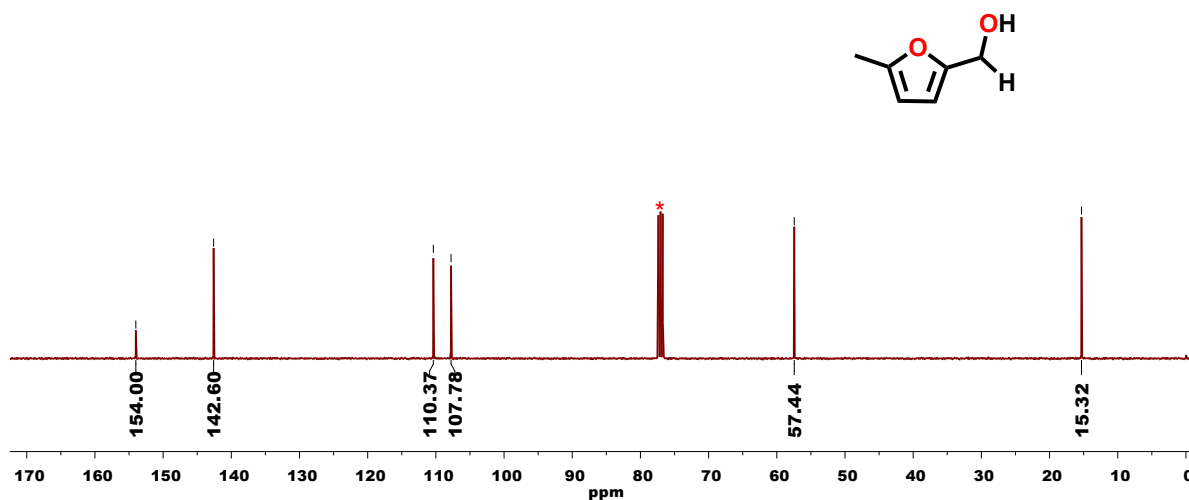

**Figure S106.**  $^{13}\text{C}$  NMR spectrum of product **44** (5-methylfurfuryl alcohol) in  $\text{CDCl}_3$  solvent where \* represents the residual solvent peak.

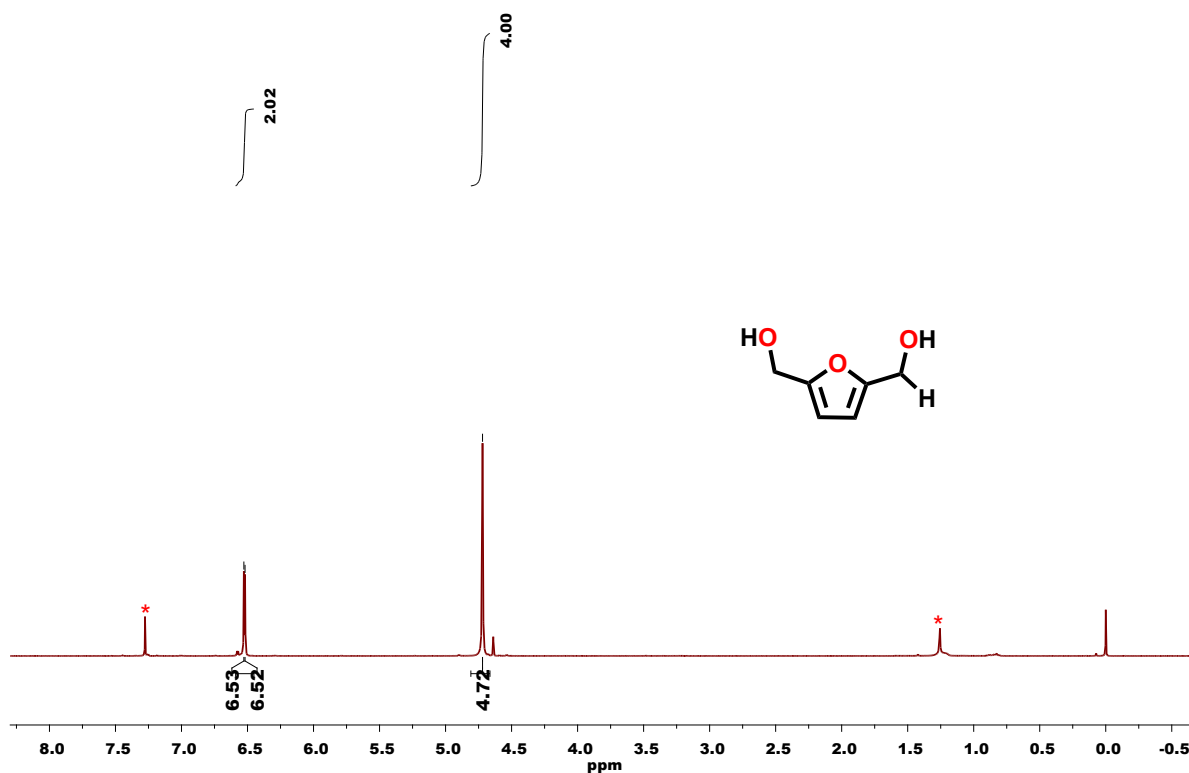

**Figure S107.**  $^1\text{H}$  NMR spectrum of product **45** (5-(hydroxymethyl)furfuryl alcohol) in  $\text{CDCl}_3$  solvent where \* represents the residual solvent peak.

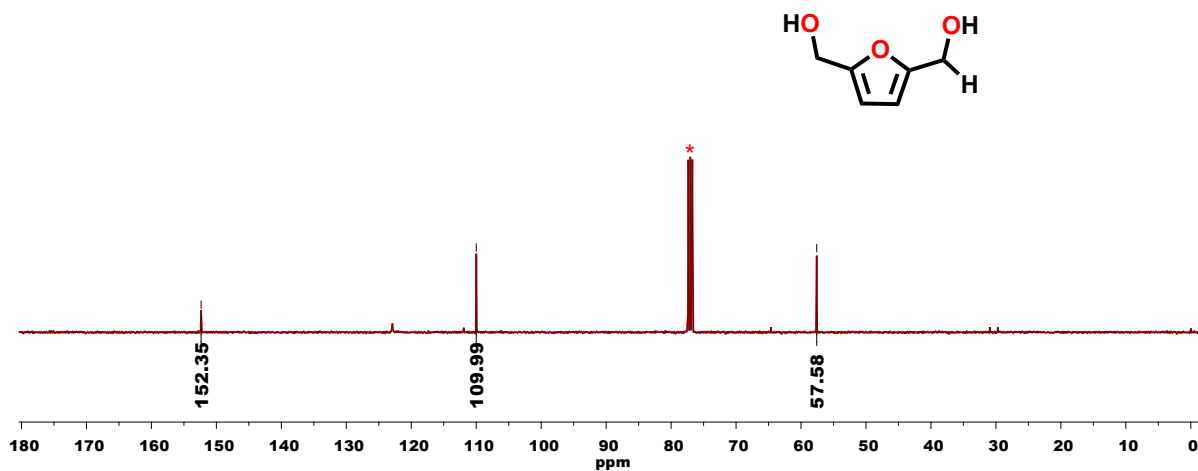

**Figure S108.**  $^{13}\text{C}$  NMR spectrum of product **45** (5-(hydroxymethyl)furfuryl alcohol) in  $\text{CDCl}_3$  solvent where \* represents the residual solvent peak.

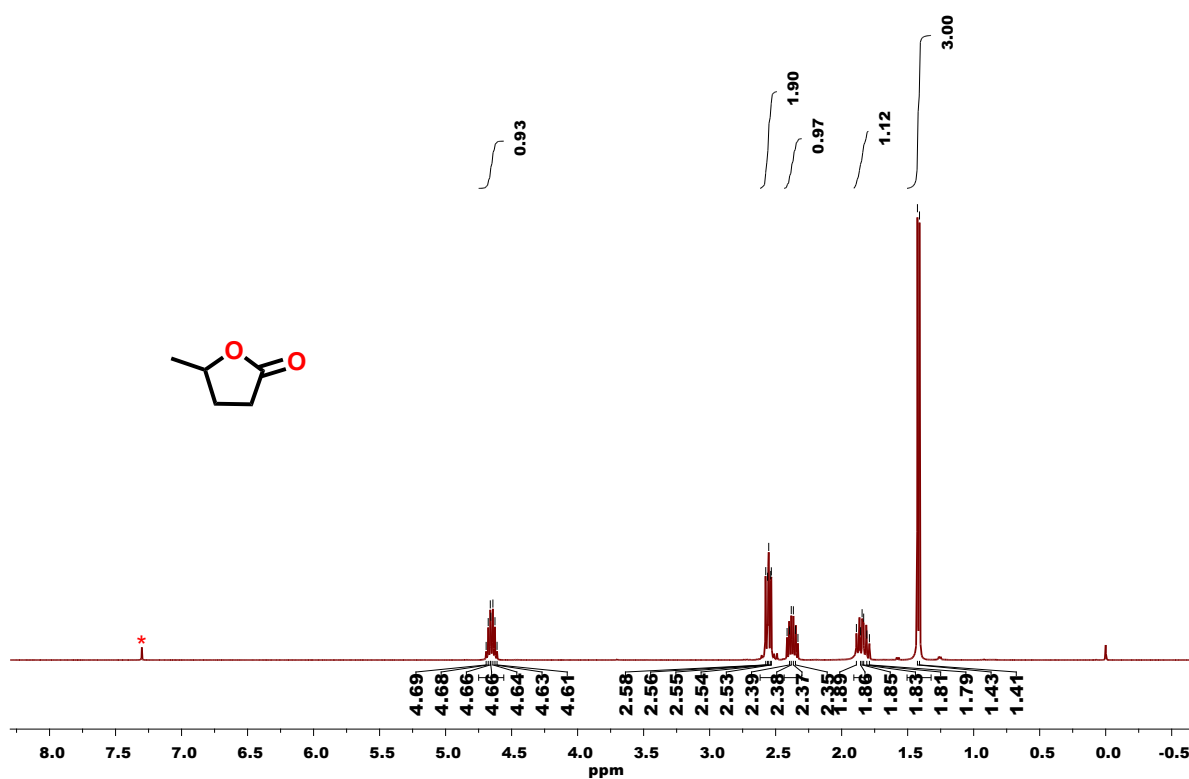

**Figure S109.**  $^1\text{H}$  NMR spectrum of product **46** (gamma-valerolactone) in  $\text{CDCl}_3$  solvent where \* represents the residual solvent peak.



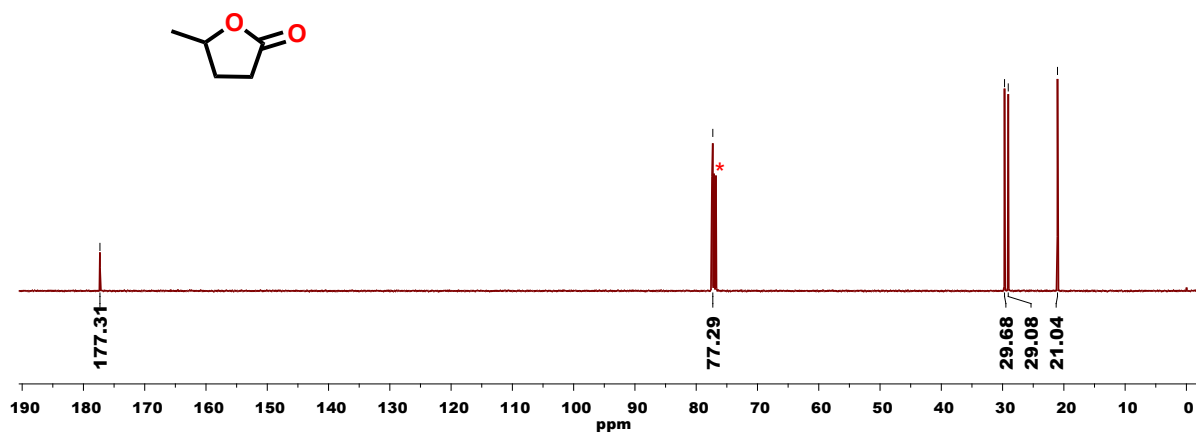

**Figure S110.**  $^{13}\text{C}$  NMR spectrum of product **46** (gamma-valerolactone) in  $\text{CDCl}_3$  solvent where \* represents the residual solvent peak.

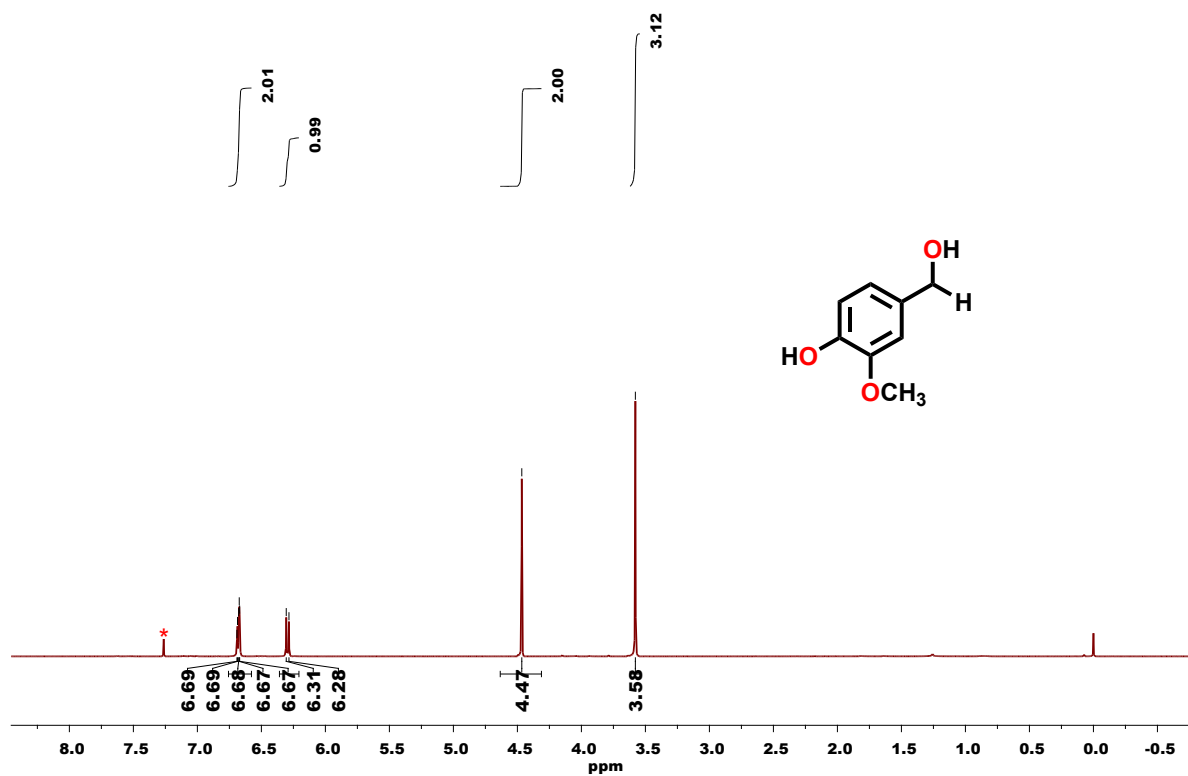

**Figure S111.**  $^1\text{H}$  NMR spectrum of product **47** (vanillyl alcohol) in  $\text{CDCl}_3$  solvent where \* represents the residual solvent peak.

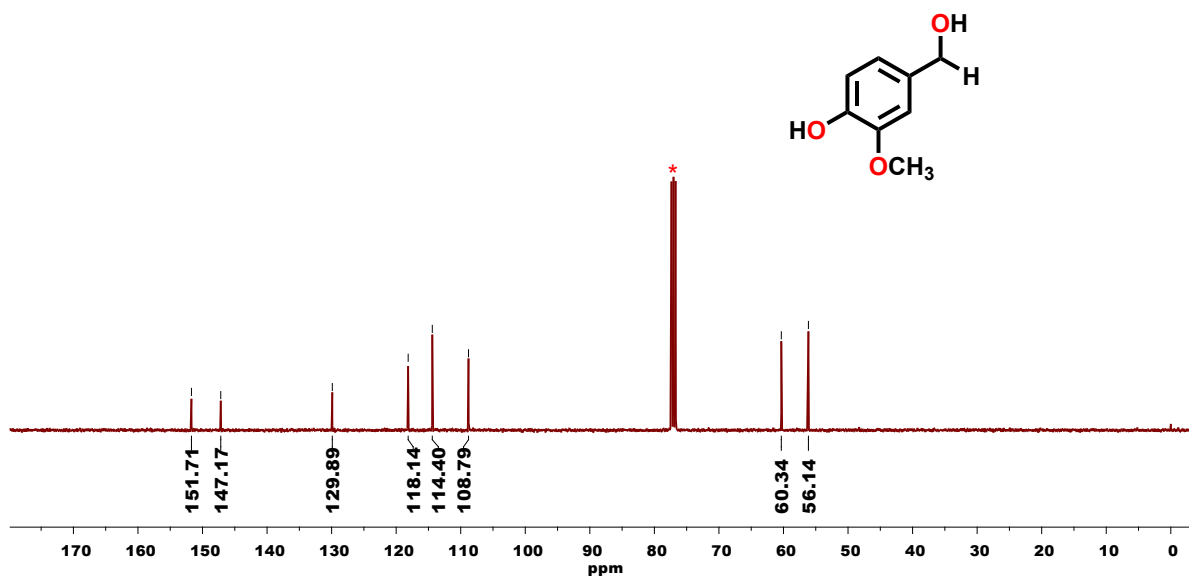

**Figure S112.** <sup>13</sup>C NMR spectrum of product 47 (vanillyl alcohol) in CDCl<sub>3</sub> solvent where \* represents the residual solvent peak.

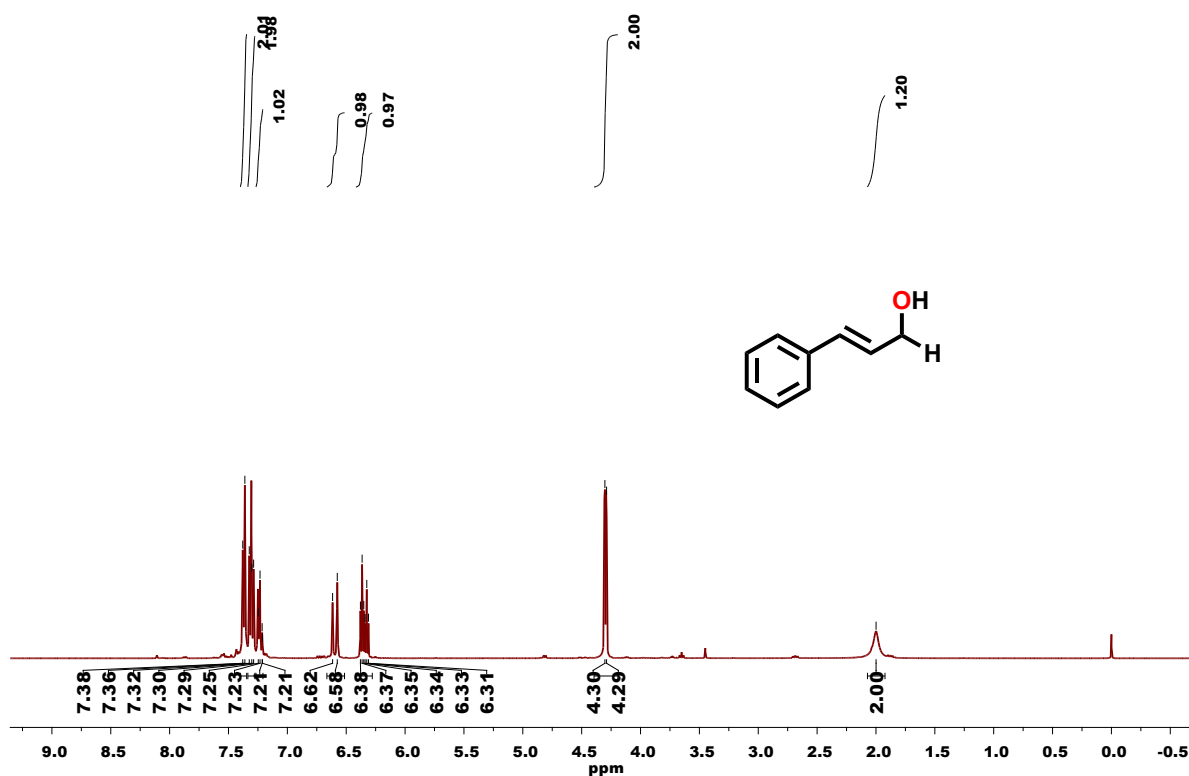

**Figure S113.** <sup>1</sup>H NMR spectrum of product 48 (cinnamyl alcohol) in CDCl<sub>3</sub> solvent where \* represents the residual solvent peak.

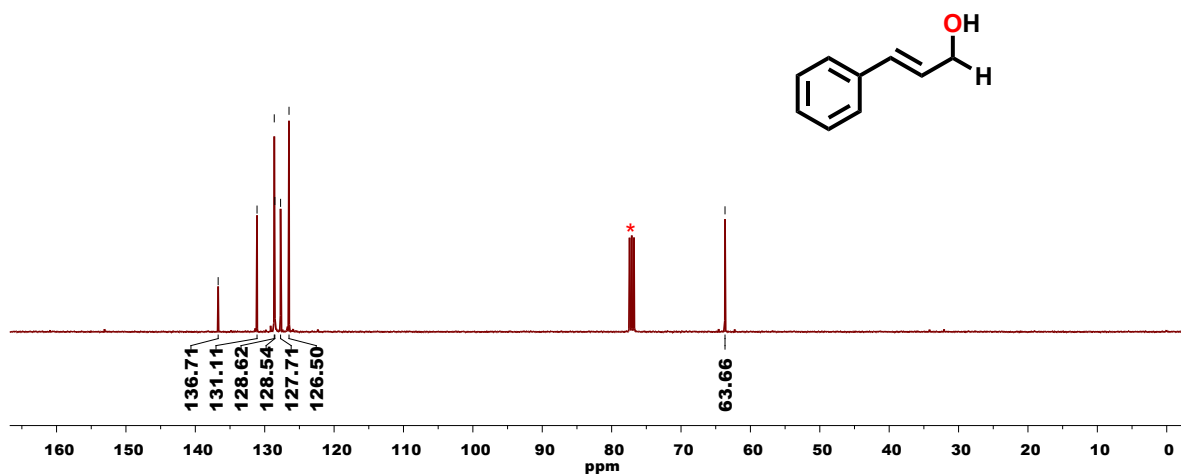

**Figure S114.**  $^{13}\text{C}$  NMR spectrum of product **48** (cinnamyl alcohol) in  $\text{CDCl}_3$  solvent where \* represents the residual solvent peak.

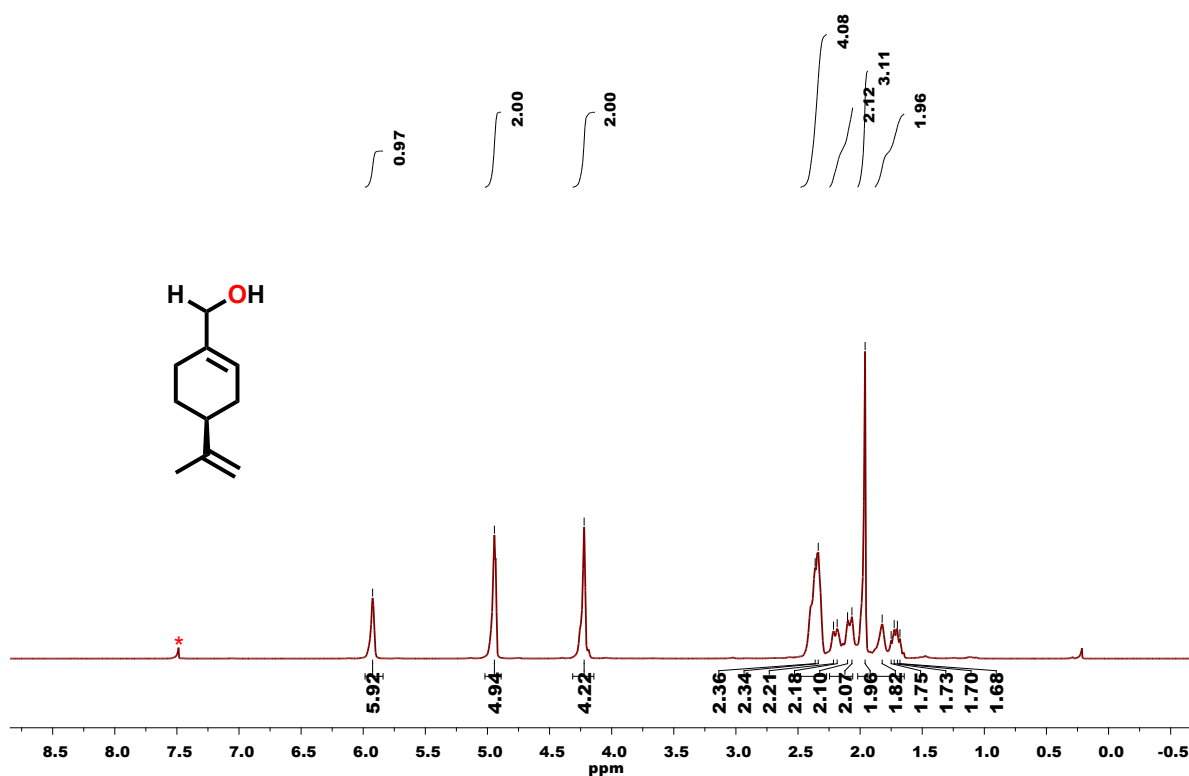

**Figure S115.**  $^1\text{H}$  NMR spectrum of product **49** (perillyl alcohol) in  $\text{CDCl}_3$  solvent where \* represents the residual solvent peak.

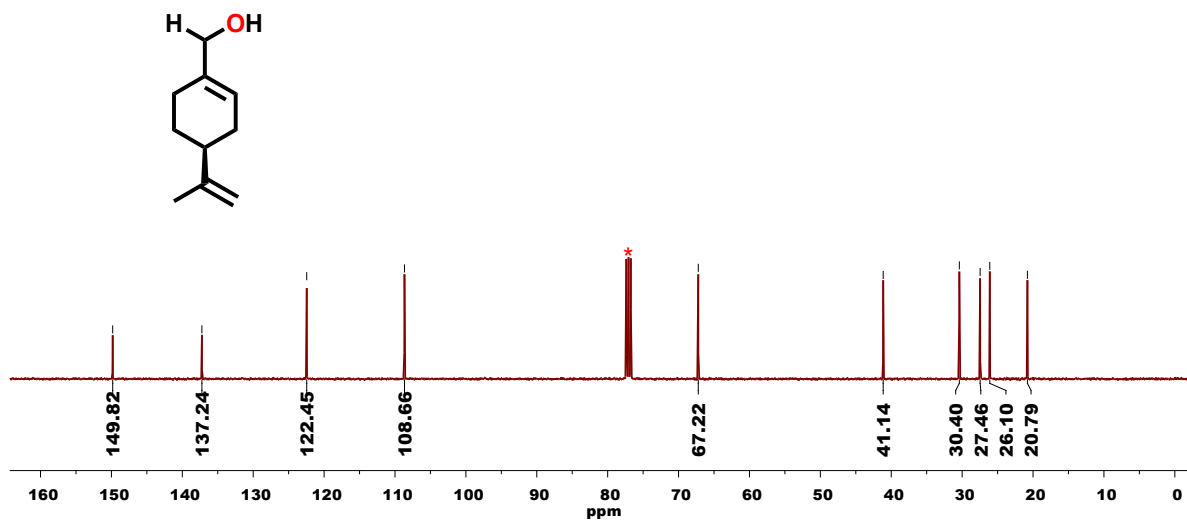

**Figure S116.**  $^{13}\text{C}$  NMR spectrum of product **49** (perillyl alcohol) in  $\text{CDCl}_3$  solvent where \* represents the residual solvent peak.

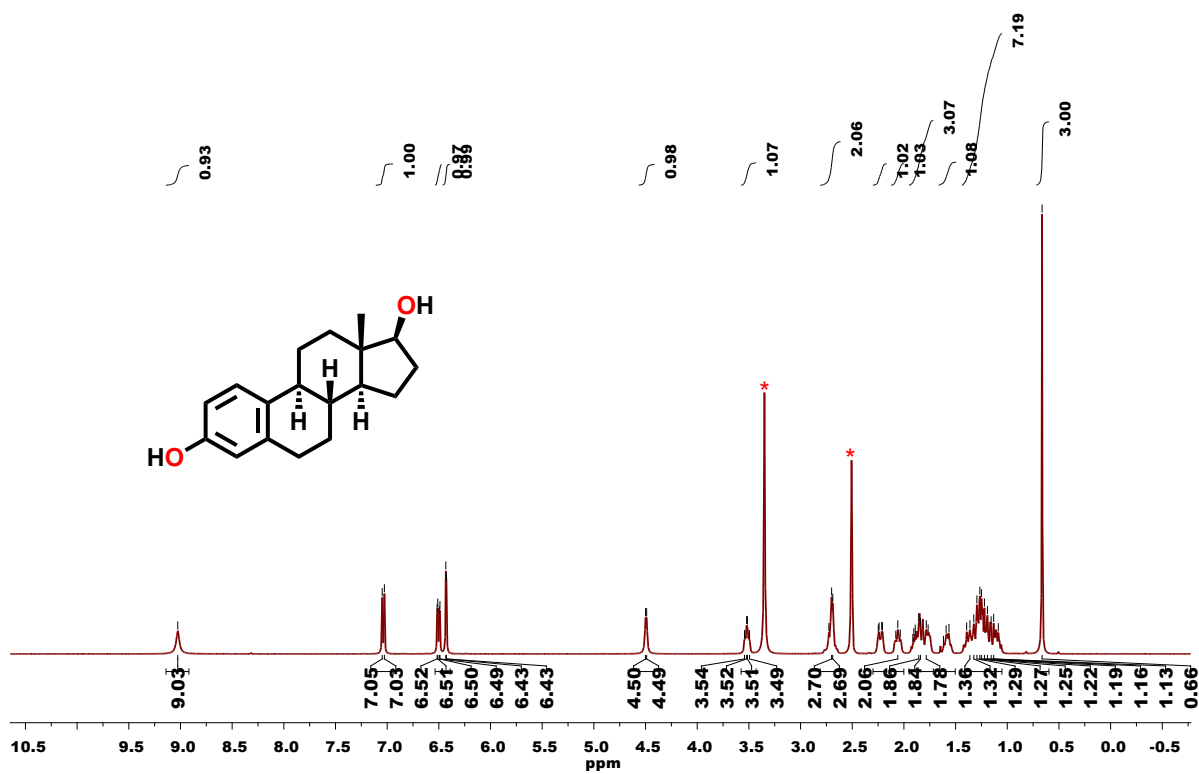

**Figure S117.**  $^1\text{H}$  NMR spectrum of product **50** (estradiol) in  $(\text{DMSO}-d_6)$  solvent where \* represents the residual solvent and/or adventitious water peaks.

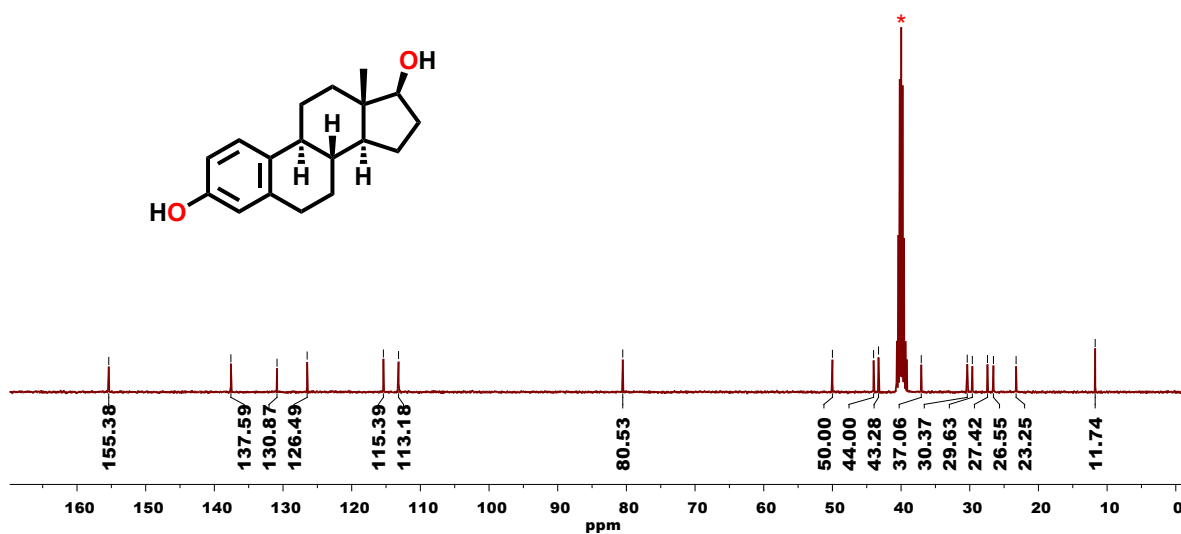

**Figure S118.** <sup>13</sup>C NMR spectrum of product **50** (estradiol) in (DMSO-*d*<sub>6</sub>) solvent where \* represents the residual solvent peak.

**Table S1.** Crystallographic data collection and structure refinement parameters for MOF 1.

|                                                              | <b>1</b>                                                                          |
|--------------------------------------------------------------|-----------------------------------------------------------------------------------|
| Empirical formula                                            | C <sub>128</sub> H <sub>110</sub> N <sub>14</sub> O <sub>51</sub> Co <sub>4</sub> |
| Formula weight                                               | 2896.01                                                                           |
| Temperature/K                                                | 296.15                                                                            |
| Crystal system                                               | monoclinic                                                                        |
| Space group                                                  | <i>C2/c</i>                                                                       |
| <i>a</i> /Å                                                  | 27.2275(13)                                                                       |
| <i>b</i> /Å                                                  | 14.6648(5)                                                                        |
| <i>c</i> /Å                                                  | 43.1167(16)                                                                       |
| $\alpha$ /°                                                  | 90                                                                                |
| $\beta$ /°                                                   | 99.068(2)                                                                         |
| $\gamma$ /°                                                  | 90                                                                                |
| Volume/Å <sup>3</sup>                                        | 17000.7(12)                                                                       |
| <i>Z</i>                                                     | 4                                                                                 |
| $\rho_{\text{calc}}$ /cm <sup>3</sup>                        | 1.131                                                                             |
| $\mu$ /mm <sup>-1</sup>                                      | 0.459                                                                             |
| <i>F</i> (000)                                               | 5968.0                                                                            |
| Crystal size/mm <sup>3</sup>                                 | 0.23 × 0.14 × 0.12                                                                |
| Radiation                                                    | MoK $\alpha$ ( $\lambda$ = 0.71073)                                               |
| 2 $\Theta$ range for data collection/°                       | 3.818 to 56.71                                                                    |
| Index ranges                                                 | -36 ≤ <i>h</i> ≤ 36, -19 ≤ <i>k</i> ≤ 18, -57 ≤ <i>l</i> ≤ 57                     |
| Reflections collected                                        | 135294                                                                            |
| Independent reflections                                      | 21223 [ <i>R</i> <sub>int</sub> = 0.1064, <i>R</i> <sub>sigma</sub> = 0.0731]     |
| Data/restraints/parameters                                   | 21223/0/896                                                                       |
| Goodness-of-fit on <i>F</i> <sup>2</sup>                     | 1.031                                                                             |
| Final <i>R</i> indexes [ <i>I</i> ≥ 2 $\sigma$ ( <i>I</i> )] | <i>R</i> <sub><i>I</i></sub> = 0.1026, <i>wR</i> <sub>2</sub> = 0.2824            |
| Final <i>R</i> indexes [all data]                            | <i>R</i> <sub><i>I</i></sub> = 0.1481, <i>wR</i> <sub>2</sub> = 0.3159            |
| Largest diff. peak/hole / e Å <sup>-3</sup>                  | 1.72/-1.55                                                                        |
| CCDC No.                                                     | 2334280                                                                           |

**Table S2.** Selected bond distances (Å) for MOF 1.

| <b>Bond</b>               | <b>1</b> |
|---------------------------|----------|
| Co(2)-O(19)               | 2.173(2) |
| Co(2)-O(14) <sup>#1</sup> | 2.073(3) |
| Co(2)-O(16)               | 2.057(4) |
| Co(2)-O(18)               | 2.038(4) |
| Co(2)-O(23)               | 2.085(4) |
| Co(2)-O(20)               | 2.133(4) |
| Co(1)-O(4) <sup>#2</sup>  | 2.110(4) |
| Co(1)-O(17)               | 2.051(6) |
| Co(1)-O(15)               | 2.102(5) |
| Co(1)-O(22)               | 2.061(8) |
| Co(1)-O(21)               | 2.102(7) |
| Co(1)-O(20)               | 2.091(5) |

Symmetry transformations used to generate equivalent atoms: <sup>#1</sup>+*X*,2-*Y*,-1/2+*Z*; <sup>#2</sup>+*X*,2-*Y*,1/2+*Z*

**Table S3.** Selected bond angles (°) for MOF 1.

| Bond                 | 1          |
|----------------------|------------|
| O(14) #1-Co(2)-O(19) | 87.22(12)  |
| O(14) #1-Co(2)-O(23) | 88.24(16)  |
| O(14) #1-Co(2)-O(20) | 91.75(15)  |
| O(16)-Co(2)-O(19)    | 85.76(15)  |
| O(16)-Co(2)-O(14) #1 | 85.31(15)  |
| O(16)-Co(2)-O(23)    | 170.34(18) |
| O(16)-Co(2)-O(20)    | 94.82(17)  |
| O(18)-Co(2)-O(19)    | 89.01(15)  |
| O(18)-Co(2)-O(14) #1 | 175.2(2)   |
| O(18)-Co(2)-O(16)    | 97.36(18)  |
| O(18)-Co(2)-O(23)    | 88.60(19)  |
| O(18)-Co(2)-O(20)    | 91.98(17)  |
| O(23)-Co(2)-O(19)    | 86.74(17)  |
| O(23)-Co(2)-O(20)    | 92.56(19)  |
| O(20)-Co(2)-O(19)    | 178.78(16) |
| O(17)-Co(1)-O(4) #2  | 84.2(2)    |
| O(17)-Co(1)-O(15)    | 94.7(2)    |
| O(17)-Co(1)-O(22)    | 87.4(3)    |
| O(17)-Co(1)-O(21)    | 174.0(3)   |
| O(17)-Co(1)-O(20)    | 95.2(2)    |
| O(15)-Co(1)-O(4) #2  | 178.2(2)   |
| O(15)-Co(1)-O(21)    | 89.3(2)    |
| O(22)-Co(1)-O(4) #2  | 93.3(3)    |
| O(22)-Co(1)-O(15)    | 88.1(3)    |
| O(22)-Co(1)-O(21)    | 88.3(4)    |
| O(22)-Co(1)-O(20)    | 176.0(2)   |
| O(21)-Co(1)-O(4) #2  | 91.8(2)    |
| O(20)-Co(1)-O(4) #2  | 89.92(17)  |
| O(20)-Co(1)-O(15)    | 88.7(2)    |
| O(20)-Co(1)-O(21)    | 89.3(3)    |
| Co(2)-O(19)-Co(2) #3 | 132.3(2)   |

Symmetry transformations used to generate equivalent atoms: #1+X,2-Y,-1/2+Z; #2+X,2-Y,1/2+Z; #31-X,+Y,3/2-Z

**Table S4.** Zero pass CHEM 21 green metrics toolkit parameters.

| Yield, conversion, selectivity, AE, RME                                                                                                                                                                                                                                                                                                                         |                        |               |           |          |             |         |             |                  |                           |                               |             |                  |             |                |                           |                               |              |      |      |      |            |       |        |           |                             |      |  |      |    |       |  |  |     |      |  |  |
|-----------------------------------------------------------------------------------------------------------------------------------------------------------------------------------------------------------------------------------------------------------------------------------------------------------------------------------------------------------------|------------------------|---------------|-----------|----------|-------------|---------|-------------|------------------|---------------------------|-------------------------------|-------------|------------------|-------------|----------------|---------------------------|-------------------------------|--------------|------|------|------|------------|-------|--------|-----------|-----------------------------|------|--|------|----|-------|--|--|-----|------|--|--|
| Reactant (Limiting Reactant First)                                                                                                                                                                                                                                                                                                                              | Mass (g)               | MW            | Mol       | Catalyst | Mass (g)    | Reagent | Mass (g)    | Reaction solvent | Volume (cm <sup>3</sup> ) | Density (g ml <sup>-1</sup> ) | Mass (g)    | Work up chemical | Mass (g)    | Workup solvent | Volume (cm <sup>3</sup> ) | Density (g ml <sup>-1</sup> ) | Mass (g)     |      |      |      |            |       |        |           |                             |      |  |      |    |       |  |  |     |      |  |  |
| Furfural                                                                                                                                                                                                                                                                                                                                                        | 1.00                   | 96.08         | 0.01      | [Co]     | 0.03        |         |             | Isopropanol      | 2.00                      | 0.79                          | 1.58        |                  |             | ethylacetate   | 15.00                     | 0.90                          | 13.50        |      |      |      |            |       |        |           |                             |      |  |      |    |       |  |  |     |      |  |  |
| Isopropanol                                                                                                                                                                                                                                                                                                                                                     | 0.62                   | 60.10         | 0.01      |          |             |         |             |                  |                           |                               | 0.00        |                  |             |                |                           |                               | 0.00         |      |      |      |            |       |        |           |                             |      |  |      |    |       |  |  |     |      |  |  |
| <b>Total</b>                                                                                                                                                                                                                                                                                                                                                    | <b>1.62</b>            | <b>156.18</b> |           |          | <b>0.03</b> |         | <b>0.00</b> |                  |                           |                               | <b>1.58</b> |                  | <b>0.00</b> |                |                           |                               | <b>13.50</b> |      |      |      |            |       |        |           |                             |      |  |      |    |       |  |  |     |      |  |  |
| $AE = \frac{\text{molecular weight of product}}{\text{total molecular weight of reactants}} \times 100$<br>$RME = \frac{\text{mass of isolated product}}{\text{total mass of reactants}} \times 100$                                                                                                                                                            |                        |               |           |          |             |         |             |                  |                           |                               |             |                  |             |                |                           |                               |              |      |      |      |            |       |        |           |                             |      |  |      |    |       |  |  |     |      |  |  |
| <table border="0"> <tr> <td>Yield</td> <td>99.9</td> <td>Flag</td> <td>99.9</td> </tr> <tr> <td>Conversion</td> <td>100.0</td> <td></td> <td>100.0</td> </tr> <tr> <td>Selectivity</td> <td>99.9</td> <td></td> <td>99.9</td> </tr> <tr> <td>AE</td> <td>62.8</td> <td></td> <td></td> </tr> <tr> <td>RME</td> <td>63.0</td> <td></td> <td></td> </tr> </table> |                        |               |           |          |             |         |             |                  |                           |                               |             |                  |             |                |                           |                               | Yield        | 99.9 | Flag | 99.9 | Conversion | 100.0 |        | 100.0     | Selectivity                 | 99.9 |  | 99.9 | AE | 62.8  |  |  | RME | 63.0 |  |  |
| Yield                                                                                                                                                                                                                                                                                                                                                           | 99.9                   | Flag          | 99.9      |          |             |         |             |                  |                           |                               |             |                  |             |                |                           |                               |              |      |      |      |            |       |        |           |                             |      |  |      |    |       |  |  |     |      |  |  |
| Conversion                                                                                                                                                                                                                                                                                                                                                      | 100.0                  |               | 100.0     |          |             |         |             |                  |                           |                               |             |                  |             |                |                           |                               |              |      |      |      |            |       |        |           |                             |      |  |      |    |       |  |  |     |      |  |  |
| Selectivity                                                                                                                                                                                                                                                                                                                                                     | 99.9                   |               | 99.9      |          |             |         |             |                  |                           |                               |             |                  |             |                |                           |                               |              |      |      |      |            |       |        |           |                             |      |  |      |    |       |  |  |     |      |  |  |
| AE                                                                                                                                                                                                                                                                                                                                                              | 62.8                   |               |           |          |             |         |             |                  |                           |                               |             |                  |             |                |                           |                               |              |      |      |      |            |       |        |           |                             |      |  |      |    |       |  |  |     |      |  |  |
| RME                                                                                                                                                                                                                                                                                                                                                             | 63.0                   |               |           |          |             |         |             |                  |                           |                               |             |                  |             |                |                           |                               |              |      |      |      |            |       |        |           |                             |      |  |      |    |       |  |  |     |      |  |  |
| <table border="0"> <tr> <td>Product</td> <td>mass</td> <td>mw</td> <td>mol</td> </tr> <tr> <td></td> <td>1.020</td> <td>96.100</td> <td>0.0103976</td> </tr> <tr> <td>Unreacted limiting reactant</td> <td>mass</td> <td></td> <td></td> </tr> <tr> <td></td> <td>0.000</td> <td></td> <td></td> </tr> </table>                                                 |                        |               |           |          |             |         |             |                  |                           |                               |             |                  |             |                |                           |                               | Product      | mass | mw   | mol  |            | 1.020 | 96.100 | 0.0103976 | Unreacted limiting reactant | mass |  |      |    | 0.000 |  |  |     |      |  |  |
| Product                                                                                                                                                                                                                                                                                                                                                         | mass                   | mw            | mol       |          |             |         |             |                  |                           |                               |             |                  |             |                |                           |                               |              |      |      |      |            |       |        |           |                             |      |  |      |    |       |  |  |     |      |  |  |
|                                                                                                                                                                                                                                                                                                                                                                 | 1.020                  | 96.100        | 0.0103976 |          |             |         |             |                  |                           |                               |             |                  |             |                |                           |                               |              |      |      |      |            |       |        |           |                             |      |  |      |    |       |  |  |     |      |  |  |
| Unreacted limiting reactant                                                                                                                                                                                                                                                                                                                                     | mass                   |               |           |          |             |         |             |                  |                           |                               |             |                  |             |                |                           |                               |              |      |      |      |            |       |        |           |                             |      |  |      |    |       |  |  |     |      |  |  |
|                                                                                                                                                                                                                                                                                                                                                                 | 0.000                  |               |           |          |             |         |             |                  |                           |                               |             |                  |             |                |                           |                               |              |      |      |      |            |       |        |           |                             |      |  |      |    |       |  |  |     |      |  |  |
| <b>Solvents (Zero Pass)</b>                                                                                                                                                                                                                                                                                                                                     |                        |               |           |          |             |         |             |                  |                           |                               |             |                  |             |                |                           |                               |              |      |      |      |            |       |        |           |                             |      |  |      |    |       |  |  |     |      |  |  |
| <b>Highly hazardous solvents (Red flag for any of the following)</b>                                                                                                                                                                                                                                                                                            |                        |               |           |          |             |         |             |                  |                           |                               |             |                  |             |                |                           |                               |              |      |      |      |            |       |        |           |                             |      |  |      |    |       |  |  |     |      |  |  |
| Et <sub>2</sub> O, Benzene, CCl <sub>4</sub> , chloroform, DCE, nitromethane, CS <sub>2</sub> , HMPA                                                                                                                                                                                                                                                            |                        |               |           |          |             |         |             |                  |                           |                               |             |                  |             |                |                           |                               |              |      |      |      |            |       |        |           |                             |      |  |      |    |       |  |  |     |      |  |  |
| <b>List Highly Hazardous Solvents Below</b>                                                                                                                                                                                                                                                                                                                     |                        |               |           |          |             |         |             |                  |                           |                               |             |                  |             |                |                           |                               |              |      |      |      |            |       |        |           |                             |      |  |      |    |       |  |  |     |      |  |  |
| None                                                                                                                                                                                                                                                                                                                                                            |                        |               |           |          |             |         |             |                  |                           |                               |             |                  |             |                |                           |                               |              |      |      |      |            |       |        |           |                             |      |  |      |    |       |  |  |     |      |  |  |
| <b>Health and Safety (Zero Pass)</b>                                                                                                                                                                                                                                                                                                                            |                        |               |           |          |             |         |             |                  |                           |                               |             |                  |             |                |                           |                               |              |      |      |      |            |       |        |           |                             |      |  |      |    |       |  |  |     |      |  |  |
| <b>Health &amp; safety (Red flag for any of the following)</b>                                                                                                                                                                                                                                                                                                  |                        |               |           |          |             |         |             |                  |                           |                               |             |                  |             |                |                           |                               |              |      |      |      |            |       |        |           |                             |      |  |      |    |       |  |  |     |      |  |  |
| <b>List substances plus the red flagged H-codes below</b>                                                                                                                                                                                                                                                                                                       |                        |               |           |          |             |         |             |                  |                           |                               |             |                  |             |                |                           |                               |              |      |      |      |            |       |        |           |                             |      |  |      |    |       |  |  |     |      |  |  |
| Highly explosive                                                                                                                                                                                                                                                                                                                                                | H200, H201, H202, H203 | None          |           |          |             |         |             |                  |                           |                               |             |                  |             |                |                           |                               |              |      |      |      |            |       |        |           |                             |      |  |      |    |       |  |  |     |      |  |  |
| Explosive thermal runaway                                                                                                                                                                                                                                                                                                                                       | H240                   | None          |           |          |             |         |             |                  |                           |                               |             |                  |             |                |                           |                               |              |      |      |      |            |       |        |           |                             |      |  |      |    |       |  |  |     |      |  |  |
| Fatally toxic                                                                                                                                                                                                                                                                                                                                                   | H300, H310, H330       | None          |           |          |             |         |             |                  |                           |                               |             |                  |             |                |                           |                               |              |      |      |      |            |       |        |           |                             |      |  |      |    |       |  |  |     |      |  |  |
| Mutagenic                                                                                                                                                                                                                                                                                                                                                       | H350                   | None          |           |          |             |         |             |                  |                           |                               |             |                  |             |                |                           |                               |              |      |      |      |            |       |        |           |                             |      |  |      |    |       |  |  |     |      |  |  |
| Repro-toxic                                                                                                                                                                                                                                                                                                                                                     | H360                   | None          |           |          |             |         |             |                  |                           |                               |             |                  |             |                |                           |                               |              |      |      |      |            |       |        |           |                             |      |  |      |    |       |  |  |     |      |  |  |
| Serious environmental implications                                                                                                                                                                                                                                                                                                                              | H420                   | None          |           |          |             |         |             |                  |                           |                               |             |                  |             |                |                           |                               |              |      |      |      |            |       |        |           |                             |      |  |      |    |       |  |  |     |      |  |  |

**Table S5. First pass CHEM 21 green metrics toolkit parameters.**

| Yield, AE, RME, MI/PMI and OE                                                                           |             |               |      |          |             |         |                                   |                  |                           |                               |             |                  |             |                |                           |                               |              |  |
|---------------------------------------------------------------------------------------------------------|-------------|---------------|------|----------|-------------|---------|-----------------------------------|------------------|---------------------------|-------------------------------|-------------|------------------|-------------|----------------|---------------------------|-------------------------------|--------------|--|
| Reactant (Limiting Reactant First)                                                                      | Mass (g)    | MW            | Mol  | Catalyst | Mass (g)    | Reagent | Mass (g)                          | Reaction solvent | Volume (cm <sup>3</sup> ) | Density (g ml <sup>-1</sup> ) | Mass (g)    | Work up chemical | Mass (g)    | Workup solvent | Volume (cm <sup>3</sup> ) | Density (g ml <sup>-1</sup> ) | Mass (g)     |  |
| Furfural                                                                                                | 1.00        | 96.08         | 0.01 | [Co]     | 0.03        |         |                                   | Isopropanol      | 2.00                      | 0.79                          | 1.58        |                  |             | ethyl acetate  | 15.00                     | 0.90                          | 13.50        |  |
| Isopropanol                                                                                             | 0.62        | 60.10         | 0.01 |          |             |         |                                   |                  |                           |                               | 0.00        |                  |             |                |                           |                               | 0.00         |  |
| <b>Total</b>                                                                                            | <b>1.62</b> | <b>156.18</b> |      |          | <b>0.03</b> |         | <b>0.00</b>                       |                  |                           |                               | <b>1.58</b> |                  | <b>0.00</b> |                |                           |                               | <b>13.50</b> |  |
|                                                                                                         |             |               |      |          |             |         | Yield                             | 99.9             | Flag                      | 99.9                          |             |                  |             |                |                           |                               |              |  |
|                                                                                                         |             |               |      |          |             |         | Conversion                        | 100.0            |                           | 100.0                         |             |                  |             |                |                           |                               |              |  |
|                                                                                                         |             |               |      |          |             |         | Selectivity                       | 99.9             |                           | 99.9                          |             |                  |             |                |                           |                               |              |  |
|                                                                                                         |             |               |      |          |             |         | AE                                | 62.8             |                           |                               |             |                  |             |                |                           |                               |              |  |
|                                                                                                         |             |               |      |          |             |         | RME                               | 63.0             | OE                        | 100.2                         |             |                  |             |                |                           |                               |              |  |
|                                                                                                         |             |               |      |          |             |         | PMI total                         | 16.4             |                           |                               |             |                  |             |                |                           |                               |              |  |
|                                                                                                         |             |               |      |          |             |         | PMI Reaction                      | 3.2              |                           |                               |             |                  |             |                |                           |                               |              |  |
|                                                                                                         |             |               |      |          |             |         | PMI reactants, reagents, catalyst | 1.6              |                           |                               |             |                  |             |                |                           |                               |              |  |
|                                                                                                         |             |               |      |          |             |         | PMI reaction solvents             | 1.5              |                           |                               |             |                  |             |                |                           |                               |              |  |
|                                                                                                         |             |               |      |          |             |         | PMI Workup                        | 13.2             |                           |                               |             |                  |             |                |                           |                               |              |  |
|                                                                                                         |             |               |      |          |             |         | PMI Workup chemical               | 0.0              |                           |                               |             |                  |             |                |                           |                               |              |  |
|                                                                                                         |             |               |      |          |             |         | PMI workup solvents               | 13.2             |                           |                               |             |                  |             |                |                           |                               |              |  |
|                                                                                                         |             |               |      |          |             |         | Product                           | Mass             | MW                        | Mol                           |             |                  |             |                |                           |                               |              |  |
|                                                                                                         |             |               |      |          |             |         | Unreacted limiting                | 0.00             | 1.020                     | 98.100                        | 0.010397554 |                  |             |                |                           |                               |              |  |
|                                                                                                         |             |               |      |          |             |         | mass                              |                  |                           |                               |             |                  |             |                |                           |                               |              |  |
|                                                                                                         |             |               |      |          |             |         | Unreacted limiting                | 0.00             |                           |                               |             |                  |             |                |                           |                               |              |  |
| $\text{mass intensity} = \frac{\text{total mass in a process or process step}}{\text{mass of product}}$ |             |               |      |          |             |         |                                   |                  |                           |                               |             |                  |             |                |                           |                               |              |  |
|                                                                                                         |             |               |      |          |             |         | PMI Reaction                      | 3.2              |                           |                               |             |                  |             |                |                           |                               |              |  |
|                                                                                                         |             |               |      |          |             |         | PMI reactants, reagents, catalyst | 1.6              |                           |                               |             |                  |             |                |                           |                               |              |  |
|                                                                                                         |             |               |      |          |             |         | PMI reaction solvents             | 1.5              |                           |                               |             |                  |             |                |                           |                               |              |  |
|                                                                                                         |             |               |      |          |             |         | PMI Workup                        | 13.2             |                           |                               |             |                  |             |                |                           |                               |              |  |
|                                                                                                         |             |               |      |          |             |         | PMI Workup chemical               | 0.0              |                           |                               |             |                  |             |                |                           |                               |              |  |
|                                                                                                         |             |               |      |          |             |         | PMI workup solvents               | 13.2             |                           |                               |             |                  |             |                |                           |                               |              |  |
|                                                                                                         |             |               |      |          |             |         | OE = $\frac{RME}{AE} \times 100$  |                  |                           |                               |             |                  |             |                |                           |                               |              |  |

  

| Solvents (First Pass)                                                    |                                                                                                                     |  | List solvents below |  |  |
|--------------------------------------------------------------------------|---------------------------------------------------------------------------------------------------------------------|--|---------------------|--|--|
| Preferred solvents                                                       | water, EtOH, nBuOH, AcOipr, AcOnBu, PhOMe, MeOH, tBuOH, BnOH, ethylene glycol, acetone, MEK, MIBK, AcOEt, sulfolane |  | 2-propanol          |  |  |
| Problematic solvents: (acceptable only if substitution does not offer)   | DMSO, cyclohexanone, DMPU, AcOH, Ac2O, Acetonitrile, AcOMe, THF, heptane, Me-cyclohexane, toluene, xylene,          |  |                     |  |  |
| Hazardous solvents: These solvents have significant health and/or safety | dioxane, pentane, TEA, diisopropyl ether, DME, DCM, DMF, DMA, NMP, methoxyethanol, hexane                           |  |                     |  |  |
| Highly hazardous solvents: The                                           | Et <sub>2</sub> O, Benzene, CCl <sub>4</sub> , chloroform, DCE, nitromethane, CS <sub>2</sub> .                     |  |                     |  |  |

  

| Catalyst/enzyme (First Pass)                                                    |            |   | Tick                               |            |   |
|---------------------------------------------------------------------------------|------------|---|------------------------------------|------------|---|
| Catalyst or enzyme used, or reaction takes place without any catalyst/reagents. | Green Flag | ✓ | Facile recovery of catalyst/enzyme | Green Flag | ✓ |
| Use of stoichiometric quantities of reagents                                    | Amber Flag |   | catalyst/enzyme not recovered      | Amber Flag |   |
| Use of reagents in excess                                                       | Red Flag   |   |                                    |            |   |

  

| Critical elements |             |              |
|-------------------|-------------|--------------|
| Supply remaining  | Flag colour | Note element |
| 5-50 years        | Red Flag    |              |
| 50-500 years      | Amber Flag  |              |
| +500 years        | Green Flag  | Co           |

  

| Energy (First Pass)                          |            |   | Tick                                                     |            |   |
|----------------------------------------------|------------|---|----------------------------------------------------------|------------|---|
| Reaction run between 0 to 70°C               | Green Flag | ✓ | Reaction run at reflux                                   | Red Flag   |   |
| Reaction run between -20 to 0 or 70 to 140°C | Amber Flag |   | Reaction run 5°C or more below the solvent boiling point | Green Flag | ✓ |
| Reaction run below -20 or above 140°C        | Red Flag   |   |                                                          |            |   |

  

| Batch/flow |            |  | Work Up                                                                           |            |                          |
|------------|------------|--|-----------------------------------------------------------------------------------|------------|--------------------------|
| Flow       | Green Flag |  | quenching                                                                         | Green Flag | Filtration & Evaporation |
| Batch      | Amber Flag |  | filtration                                                                        |            |                          |
|            |            |  | centrifugation                                                                    |            |                          |
|            |            |  | crystallisation                                                                   |            |                          |
|            |            |  | Low temperature distillation/evaporation/solvent exchange, quenching into aqueous | Amber Flag |                          |
|            |            |  | chromatography/ion exchange                                                       |            |                          |
|            |            |  | high temperature                                                                  | Red Flag   |                          |
|            |            |  | multiple recrystallisation                                                        |            |                          |

  

| Health & safety            |                        |                  | List substances and H-codes |      |                                 |
|----------------------------|------------------------|------------------|-----------------------------|------|---------------------------------|
| Highly explosive           | Red Flag               | Amber Flag       | Green Flag                  |      |                                 |
| Explosive thermal runaway  | H200, H201, H202, H203 | H205, H220, H224 | H241                        |      | Acetophenone: H227, H302, H318; |
| Toxic                      | H300, H310, H330       | H301, H311, H331 |                             | None | Isopropanol: H225, H319, H336;  |
| Long Term toxicity         | H340, H350, H360, H370 | H341, H351, H361 |                             |      | 1-Phenylethan-1-ol: H227, H302; |
| Environmental implications | H400, H410, H411, H420 | H401, H412       |                             |      | Acetone: H225, H319, H336.      |

  

| Use of chemicals of environmental concern                 |          |  | List substances of very high concern |  |  |
|-----------------------------------------------------------|----------|--|--------------------------------------|--|--|
| Chemical identified as Substances of Very High Concern by | Red Flag |  | None                                 |  |  |
